# Supplementary material for: Quantitative structure–activity relationships for primary aerobic biodegradation of organic chemicals in pristine surface waters: starting points for predicting biodegradation under acclimatization
Source: Royal Society of Chemistry journal article supplement (doi:10.1039/c7em00375g), 2017-11-14
Supplement: c7em00375g2.xlsx [file c7em00375g2.xlsx]

## Sheet: feature-importance-paDEL-RF-Bio
features	importance	SDEP	Descriptors	Description	Class
1494	0.046	0.094	TDB1i	3D topological distance based autocorrelation - lag 1 / weighted by first ionization potential	3D
1439	0.038	0.089	WTPT-5	Sum of path lengths starting from nitrogens	2D
1817	0.028	0.076	E3v	3rd component accessibility directional WHIM index / weighted by relative van der Waals volumes	3D
1822	0.026	0.072	Dv	D total accessibility index / weighted by relative van der Waals volumes	3D
438	0.02	0.075	SM1_Dzi	Spectral moment of order 1 from Barysz matrix / weighted by first ionization potential	2D
591	0.017	0.072	SC-3	Simple cluster, order 3	2D
1243	0.014	0.064	ZMIC3	Z-modified information content index (neighborhood symmetry of 3-order)	2D
1678	0.011	0.06	RDF80e	Radial distribution function - 080 / weighted by relative Sanderson electronegativities	3D
1542	0.01	0.05	WNSA-1	PNSA-1 * total molecular surface area /1000	3D
540	0.01	0.052	SpMax1_Bhi	Largest absolute eigenvalue of Burden modified matrix - n 1 / weighted by relative first ionization potential	2D
1588	0.01	0.052	RDF80u	Radial distribution function - 080 / unweighted	3D
914	0.01	0.032	minHsOH	Minimum atom-type H E-State: -OH	2D
567	0.009	0.049	SpMin4_Bhs	Smallest absolute eigenvalue of Burden modified matrix - n 4 / weighted by relative I-state	2D
477	0.009	0.053	SpMax2_Bhm	Largest absolute eigenvalue of Burden modified matrix - n 2 / weighted by relative mass	2D
1609	0.009	0.045	RDF35m	Radial distribution function - 035 / weighted by relative mass	3D
1496	0.009	0.034	TDB3i	3D topological distance based autocorrelation - lag 3 / weighted by first ionization potential	3D
1245	0.008	0.046	ZMIC5	Z-modified information content index (neighborhood symmetry of 5-order)	2D
1738	0.007	0.045	RDF80i	Radial distribution function - 080 / weighted by relative first ionization potential	3D
1430	0.006	0.021	SRW9	Self-returning walk count of order 9 (ln(1+x)	2D
1615	0.006	0.041	RDF65m	Radial distribution function - 065 / weighted by relative mass	3D
1244	0.006	0.035	ZMIC4	Z-modified information content index (neighborhood symmetry of 4-order)	2D
541	0.005	0.041	SpMax2_Bhi	Largest absolute eigenvalue of Burden modified matrix - n 2 / weighted by relative first ionization potential	2D
1768	0.005	0.039	RDF80s	Radial distribution function - 080 / weighted by relative I-state	3D
1809	0.005	0.027	Dm	D total accessibility index / weighted by relative mass	3D
250	0.005	0.023	AATSC4s	Average centered Broto-Moreau autocorrelation - lag 4 / weighted by I-state	2D
1495	0.005	0.024	TDB2i	3D topological distance based autocorrelation - lag 2 / weighted by first ionization potential	3D
1606	0.005	0.033	RDF20m	Radial distribution function - 020 / weighted by relative mass	3D
1191	0.005	0.03	ETA_Eta_B	Branching index EtaB	2D
1277	0.005	0.035	MLFER_E	Excessive molar refraction	2D
1612	0.005	0.039	RDF50m	Radial distribution function - 050 / weighted by relative mass	3D
1265	0.004	0.022	MDEO-12	Molecular distance edge between all primary and secondary oxygens	2D
332	0.004	0.035	GATS6v	Geary autocorrelation - lag 6 / weighted by van der Waals volumes	2D
1869	0.004	0.021	E3s	3rd component accessibility directional WHIM index / weighted by relative I-state	3D
1804	0.004	0.025	E3m	3rd component accessibility directional WHIM index / weighted by relative mass	3D
1193	0.004	0.036	ETA_Eta_B_RC	Branching index EtaB (with ring correction)	2D
463	0.004	0.023	BCUTp-1l	nhigh lowest polarizability weighted BCUTS	2D
196	0.004	0.022	AATSC4c	Average centered Broto-Moreau autocorrelation - lag 4 / weighted by charges	2D
1616	0.004	0.033	RDF70m	Radial distribution function - 070 / weighted by relative mass	3D
1608	0.003	0.027	RDF30m	Radial distribution function - 030 / weighted by relative mass	3D
1274	0.003	0.023	MLFER_BH	Overall or summation solute hydrogen bond basicity	2D
307	0.003	0.02	MATS5s	Moran autocorrelation - lag 5 / weighted by I-state	2D
135	0.003	0.02	ATSC6c	Centered Broto-Moreau autocorrelation - lag 6 / weighted by charges	2D
302	0.003	0.021	MATS8i	Moran autocorrelation - lag 8 / weighted by first ionization potential	2D
1140	0.003	0.02	meanI	Mean intrinsic state values I	2D
588	0.003	0.017	VCH-5	Valence chain, order 5	2D
1406	0.003	0.021	VE3_D	Logarithmic coefficient sum of the last eigenvector from topological distance matrix	2D
1242	0.003	0.02	ZMIC2	Z-modified information content index (neighborhood symmetry of 2-order)	2D
1874	0.003	0.015	Ds	D total accessibility index / weighted by relative I-state	3D
1868	0.003	0.013	E2s	2nd component accessibility directional WHIM index / weighted by relative I-state	3D
478	0.003	0.029	SpMax3_Bhm	Largest absolute eigenvalue of Burden modified matrix - n 3 / weighted by relative mass	2D
21	0.003	0.03	ATS0m	Broto-Moreau autocorrelation - lag 0 / weighted by mass	2D
1276	0.003	0.017	MLFER_S	Combined dipolarity/polarizability	2D
1835	0.003	0.018	De	D total accessibility index / weighted by relative Sanderson electronegativities	3D
258	0.003	0.022	MATS4c	Moran autocorrelation - lag 4 / weighted by charges	2D
1184	0.003	0.026	ETA_Eta_F	Functionality index EtaF	2D
314	0.003	0.015	GATS4c	Geary autocorrelation - lag 4 / weighted by charges	2D
306	0.003	0.014	MATS4s	Moran autocorrelation - lag 4 / weighted by I-state	2D
1248	0.003	0.015	Kier3	Third kappa (?) shape index	2D
200	0.003	0.013	AATSC8c	Average centered Broto-Moreau autocorrelation - lag 8 / weighted by charges	2D
365	0.002	0.015	GATS7s	Geary autocorrelation - lag 7 / weighted by I-state	2D
1648	0.002	0.031	RDF80v	Radial distribution function - 080 / weighted by relative van der Waals volumes	3D
263	0.002	0.016	MATS1m	Moran autocorrelation - lag 1 / weighted by mass	2D
137	0.002	0.012	ATSC8c	Centered Broto-Moreau autocorrelation - lag 8 / weighted by charges	2D
140	0.002	0.018	ATSC2m	Centered Broto-Moreau autocorrelation - lag 2 / weighted by mass	2D
1437	0.002	0.027	WTPT-3	Sum of path lengths starting from heteroatoms	2D
202	0.002	0.014	AATSC1m	Average centered Broto-Moreau autocorrelation - lag 1 / weighted by mass	2D
489	0.002	0.022	SpMin6_Bhm	Smallest absolute eigenvalue of Burden modified matrix - n 6 / weighted by relative mass	2D
901	0.002	0.014	minHBd	Minimum E-States for (strong) Hydrogen Bond donors	2D
972	0.002	0.018	minsOm	Minimum atom-type E-State: -O-	2D
1525	0.002	0.014	PPSA-2	Partial positive surface area * total positive charge on the molecule	3D
1141	0.002	0.012	hmax	Maximum H E-State	2D
144	0.002	0.016	ATSC6m	Centered Broto-Moreau autocorrelation - lag 6 / weighted by mass	2D
185	0.002	0.017	ATSC2s	Centered Broto-Moreau autocorrelation - lag 2 / weighted by I-state	2D
1194	0.002	0.015	ETA_EtaP_B_RC	Branching index EtaB (with ring correction) relative to molecular size	2D
1458	0.002	0.023	TDB5m	3D topological distance based autocorrelation - lag 5 / weighted by mass	3D
1843	0.002	0.017	E3p	3rd component accessibility directional WHIM index / weighted by relative polarizabilities	3D
1398	0.002	0.009	JGT	Global topological charge index	2D
1389	0.002	0.013	JGI2	Mean topological charge index of order 2	2D
549	0.002	0.022	SpMin2_Bhi	Smallest absolute eigenvalue of Burden modified matrix - n 2 / weighted by relative first ionization potential	2D
1461	0.002	0.021	TDB8m	3D topological distance based autocorrelation - lag 8 / weighted by mass	3D
1855	0.002	0.011	E2i	2nd component accessibility directional WHIM index / weighted by relative first ionization potential	3D
1189	0.002	0.023	ETA_Eta_F_L	Local functionality contribution EtaF_local	2D
479	0.002	0.022	SpMax4_Bhm	Largest absolute eigenvalue of Burden modified matrix - n 4 / weighted by relative mass	2D
1428	0.002	0.01	SRW7	Self-returning walk count of order 7 (ln(1+x)	2D
1699	0.002	0.024	RDF35p	Radial distribution function - 035 / weighted by relative polarizabilities	3D
1828	0.002	0.014	E1e	1st component accessibility directional WHIM index / weighted by relative Sanderson electronegativities	3D
1856	0.002	0.013	E3i	3rd component accessibility directional WHIM index / weighted by relative first ionization potential	3D
1255	0.002	0.014	MDEC-12	Molecular distance edge between all primary and secondary carbons	2D
187	0.002	0.013	ATSC4s	Centered Broto-Moreau autocorrelation - lag 4 / weighted by I-state	2D
1527	0.002	0.015	PNSA-1	Partial negative surface area -- sum of surface area on negative parts of molecule	3D
167	0.002	0.011	ATSC2p	Centered Broto-Moreau autocorrelation - lag 2 / weighted by polarizabilities	2D
584	0.002	0.012	SCH-6	Simple chain, order 6	2D
338	0.002	0.014	GATS4e	Geary autocorrelation - lag 4 / weighted by Sanderson electronegativities	2D
1171	0.002	0.023	ETA_Beta	A measure of electronic features of the molecule	2D
303	0.002	0.011	MATS1s	Moran autocorrelation - lag 1 / weighted by I-state	2D
461	0.002	0.01	BCUTc-1l	nhigh lowest partial charge weighted BCUTS	2D
188	0.002	0.011	ATSC5s	Centered Broto-Moreau autocorrelation - lag 5 / weighted by I-state	2D
317	0.002	0.011	GATS7c	Geary autocorrelation - lag 7 / weighted by charges	2D
1848	0.002	0.017	Dp	D total accessibility index / weighted by relative polarizabilities	3D
661	0.002	0.019	VR3_Dt	Logarithmic Randic-like eigenvector-based index from detour matrix	2D
151	0.002	0.014	ATSC4v	Centered Broto-Moreau autocorrelation - lag 4 / weighted by van der Waals volumes	2D
488	0.002	0.019	SpMin5_Bhm	Smallest absolute eigenvalue of Burden modified matrix - n 5 / weighted by relative mass	2D
1474	0.002	0.013	TDB1e	3D topological distance based autocorrelation - lag 1 / weighted by Sanderson electronegativities	3D
1020	0.002	0.011	maxHBd	Maximum E-States for (strong) Hydrogen Bond donors	2D
595	0.002	0.017	VC-3	Valence cluster, order 3	2D
500	0.002	0.019	SpMin1_Bhv	Smallest absolute eigenvalue of Burden modified matrix - n 1 / weighted by relative van der Waals volumes	2D
449	0.002	0.02	SpMAD_Dzs	Spectral mean absolute deviation from Barysz matrix / weighted by I-state	2D
520	0.002	0.012	SpMin5_Bhe	Smallest absolute eigenvalue of Burden modified matrix - n 5 / weighted by relative Sanderson electronegativities	2D
218	0.002	0.013	AATSC8v	Average centered Broto-Moreau autocorrelation - lag 8 / weighted by van der Waals volumes	2D
1519	0.002	0.021	TDB6r	3D topological distance based autocorrelation - lag 6 / weighted by covalent radius	3D
141	0.002	0.011	ATSC3m	Centered Broto-Moreau autocorrelation - lag 3 / weighted by mass	2D
1160	0.002	0.01	ETA_Epsilon_5	A measure of electronegative atom count	2D
156	0.002	0.011	ATSC0e	Centered Broto-Moreau autocorrelation - lag 0 / weighted by Sanderson electronegativities	2D
1802	0.002	0.012	E1m	1st component accessibility directional WHIM index / weighted by relative mass	3D
1174	0.002	0.012	ETA_BetaP_s	A measure of electronegative atom count of the molecule relative to molecular size	2D
928	0.002	0.01	minHCsats	Minimum atom-type H E-State: H�bonded to B, Si, P, Ge, As, Se, Sn or Pb	2D
281	0.002	0.012	MATS3e	Moran autocorrelation - lag 3 / weighted by Sanderson electronegativities	2D
1540	0.002	0.01	WPSA-2	PPSA-2 * total molecular surface area /1000	3D
359	0.002	0.008	GATS1s	Geary autocorrelation - lag 1 / weighted by I-state	2D
1207	0.001	0.011	IC3	Information content index (neighborhood symmetry of 3-order)	2D
1033	0.001	0.014	maxHsOH	Maximum atom-type H E-State: -OH	2D
210	0.001	0.011	AATSC0v	Average centered Broto-Moreau autocorrelation - lag 0 / weighted by van der Waals volumes	2D
1224	0.001	0.012	CIC2	Complementary information content index (neighborhood symmetry of 2-order)	2D
413	0.001	0.014	VE1_Dze	Coefficient sum of the last eigenvector from Barysz matrix / weighted by Sanderson electronegativities	2D
1047	0.001	0.012	maxHCsats	Maximum atom-type H E-State: H�bonded to B, Si, P, Ge, As, Se, Sn or Pb	2D
658	0.001	0.01	VE3_Dt	Logarithmic coefficient sum of the last eigenvector from detour matrix	2D
635	0.001	0.009	AVP-6	Average valence path, order 6	2D
266	0.001	0.012	MATS4m	Moran autocorrelation - lag 4 / weighted by mass	2D
1273	0.001	0.008	MLFER_A	Overall or summation solute hydrogen bond acidity	2D
216	0.001	0.012	AATSC6v	Average centered Broto-Moreau autocorrelation - lag 6 / weighted by van der Waals volumes	2D
519	0.001	0.02	SpMin4_Bhe	Smallest absolute eigenvalue of Burden modified matrix - n 4 / weighted by relative Sanderson electronegativities	2D
321	0.001	0.011	GATS3m	Geary autocorrelation - lag 3 / weighted by mass	2D
614	0.001	0.015	ASP-1	Average simple path, order 1	2D
1434	0.001	0.013	AMW	Average molecular weight (Molecular weight / Total number of atoms)	2D
1829	0.001	0.007	E2e	2nd component accessibility directional WHIM index / weighted by relative Sanderson electronegativities	3D
569	0.001	0.017	SpMin6_Bhs	Smallest absolute eigenvalue of Burden modified matrix - n 6 / weighted by relative I-state	2D
133	0.001	0.013	ATSC4c	Centered Broto-Moreau autocorrelation - lag 4 / weighted by charges	2D
203	0.001	0.007	AATSC2m	Average centered Broto-Moreau autocorrelation - lag 2 / weighted by mass	2D
311	0.001	0.007	GATS1c	Geary autocorrelation - lag 1 / weighted by charges	2D
75	0.001	0.013	AATS0m	Average Broto-Moreau autocorrelation - lag 0 / weighted by mass	2D
402	0.001	0.008	VE3_Dzv	Logarithmic coefficient sum of the last eigenvector from Barysz matrix / weighted by van der Waals volumes	2D
459	0.001	0.007	BCUTw-1l	nhigh lowest atom weighted BCUTS	2D
204	0.001	0.008	AATSC3m	Average centered Broto-Moreau autocorrelation - lag 3 / weighted by mass	2D
401	0.001	0.01	VE2_Dzv	Average coefficient sum of the last eigenvector from Barysz matrix / weighted by van der Waals volumes	2D
205	0.001	0.012	AATSC4m	Average centered Broto-Moreau autocorrelation - lag 4 / weighted by mass	2D
320	0.001	0.011	GATS2m	Geary autocorrelation - lag 2 / weighted by mass	2D
451	0.001	0.01	SM1_Dzs	Spectral moment of order 1 from Barysz matrix / weighted by I-state	2D
853	0.001	0.01	SsOm	Sum of atom-type E-State: -O-	2D
154	0.001	0.008	ATSC7v	Centered Broto-Moreau autocorrelation - lag 7 / weighted by van der Waals volumes	2D
1185	0.001	0.011	ETA_EtaP_F	Functionality index EtaF relative to molecular size	2D
1644	0.001	0.02	RDF60v	Radial distribution function - 060 / weighted by relative van der Waals volumes	3D
145	0.001	0.01	ATSC7m	Centered Broto-Moreau autocorrelation - lag 7 / weighted by mass	2D
1027	0.001	0.007	maxHBint5	Maximum E-State descriptors of strength for potential Hydrogen Bonds of path length 5	2D
161	0.001	0.007	ATSC5e	Centered Broto-Moreau autocorrelation - lag 5 / weighted by Sanderson electronegativities	2D
246	0.001	0.011	AATSC0s	Average centered Broto-Moreau autocorrelation - lag 0 / weighted by I-state	2D
564	0.001	0.011	SpMin1_Bhs	Smallest absolute eigenvalue of Burden modified matrix - n 1 / weighted by relative I-state	2D
181	0.001	0.014	ATSC7i	Centered Broto-Moreau autocorrelation - lag 7 / weighted by first ionization potential	2D
1460	0.001	0.008	TDB7m	3D topological distance based autocorrelation - lag 7 / weighted by mass	3D
598	0.001	0.012	VC-6	Valence cluster, order 6	2D
231	0.001	0.011	AATSC3p	Average centered Broto-Moreau autocorrelation - lag 3 / weighted by polarizabilities	2D
170	0.001	0.008	ATSC5p	Centered Broto-Moreau autocorrelation - lag 5 / weighted by polarizabilities	2D
903	0.001	0.009	minHBa	Minimum E-States for (strong) Hydrogen Bond acceptors	2D
251	0.001	0.01	AATSC5s	Average centered Broto-Moreau autocorrelation - lag 5 / weighted by I-state	2D
1235	0.001	0.017	MIC1	Modified information content index (neighborhood symmetry of 1-order)	2D
329	0.001	0.01	GATS3v	Geary autocorrelation - lag 3 / weighted by van der Waals volumes	2D
1444	0.001	0.008	TDB1u	3D topological distance based autocorrelation - lag 1 / unweighted	3D
1614	0.001	0.016	RDF60m	Radial distribution function - 060 / weighted by relative mass	3D
503	0.001	0.017	SpMin4_Bhv	Smallest absolute eigenvalue of Burden modified matrix - n 4 / weighted by relative van der Waals volumes	2D
262	0.001	0.009	MATS8c	Moran autocorrelation - lag 8 / weighted by charges	2D
1755	0.001	0.009	RDF15s	Radial distribution function - 015 / weighted by relative I-state	3D
1573	0.001	0.007	geomShape	Petitjean geometric shape index	3D
1756	0.001	0.007	RDF20s	Radial distribution function - 020 / weighted by relative I-state	3D
134	0.001	0.008	ATSC5c	Centered Broto-Moreau autocorrelation - lag 5 / weighted by charges	2D
585	0.001	0.011	SCH-7	Simple chain, order 7	2D
1259	0.001	0.008	MDEC-23	Molecular distance edge between all secondary and tertiary carbons	2D
464	0.001	0.015	BCUTp-1h	nlow highest polarizability weighted BCUTS	2D
660	0.001	0.008	VR2_Dt	Normalized Randic-like eigenvector-based index from detour matrix	2D
1549	0.001	0.008	THSA	Sum of solvent accessible surface areas of atoms with absolute value of partial charges less than 0.2	3D
1232	0.001	0.012	BIC4	Bond information content index (neighborhood symmetry of 4-order)	2D
1442	0.001	0.01	XLogP	XLogP	2D
176	0.001	0.006	ATSC2i	Centered Broto-Moreau autocorrelation - lag 2 / weighted by first ionization potential	2D
32	0.001	0.017	ATS2v	Broto-Moreau autocorrelation - lag 2 / weighted by van der Waals volumes	2D
288	0.001	0.011	MATS2p	Moran autocorrelation - lag 2 / weighted by polarizabilities	2D
207	0.001	0.016	AATSC6m	Average centered Broto-Moreau autocorrelation - lag 6 / weighted by mass	2D
195	0.001	0.008	AATSC3c	Average centered Broto-Moreau autocorrelation - lag 3 / weighted by charges	2D
1666	0.001	0.011	RDF20e	Radial distribution function - 020 / weighted by relative Sanderson electronegativities	3D
1241	0.001	0.007	ZMIC1	Z-modified information content index (neighborhood symmetry of 1-order)	2D
1541	0.001	0.007	WPSA-3	PPSA-3 * total molecular surface area / 1000	3D
1231	0.001	0.009	BIC3	Bond information content index (neighborhood symmetry of 3-order)	2D
1139	0.001	0.017	sumI	Sum of the intrinsic state values I	2D
1790	0.001	0.006	E2u	2nd component accessibility directional WHIM index / unweighted	3D
553	0.001	0.009	SpMin6_Bhi	Smallest absolute eigenvalue of Burden modified matrix - n 6 / weighted by relative first ionization potential	2D
350	0.001	0.009	GATS8p	Geary autocorrelation - lag 8 / weighted by polarizabilities	2D
554	0.001	0.007	SpMin7_Bhi	Smallest absolute eigenvalue of Burden modified matrix - n 7 / weighted by relative first ionization potential	2D
428	0.001	0.007	VE3_Dzp	Logarithmic coefficient sum of the last eigenvector from Barysz matrix / weighted by polarizabilities	2D
361	0.001	0.006	GATS3s	Geary autocorrelation - lag 3 / weighted by I-state	2D
1695	0.001	0.009	RDF15p	Radial distribution function - 015 / weighted by relative polarizabilities	3D
649	0.001	0.008	CrippenLogP	Crippen's LogP	2D
1618	0.001	0.009	RDF80m	Radial distribution function - 080 / weighted by relative mass	3D
360	0.001	0.007	GATS2s	Geary autocorrelation - lag 2 / weighted by I-state	2D
142	0.001	0.008	ATSC4m	Centered Broto-Moreau autocorrelation - lag 4 / weighted by mass	2D
1218	0.001	0.008	SIC2	Structural information content index (neighborhood symmetry of 2-order)	2D
227	0.001	0.008	AATSC8e	Average centered Broto-Moreau autocorrelation - lag 8 / weighted by Sanderson electronegativities	2D
453	0.001	0.007	VE2_Dzs	Average coefficient sum of the last eigenvector from Barysz matrix / weighted by I-state	2D
1467	0.001	0.007	TDB4v	3D topological distance based autocorrelation - lag 4 / weighted by van der Waals volumes	3D
944	0.001	0.008	mindsCH	Minimum atom-type E-State: =CH-	2D
485	0.001	0.011	SpMin2_Bhm	Smallest absolute eigenvalue of Burden modified matrix - n 2 / weighted by relative mass	2D
1447	0.001	0.008	TDB4u	3D topological distance based autocorrelation - lag 4 / unweighted	3D
426	0.001	0.008	VE1_Dzp	Coefficient sum of the last eigenvector from Barysz matrix / weighted by polarizabilities	2D
363	0.001	0.008	GATS5s	Geary autocorrelation - lag 5 / weighted by I-state	2D
287	0.001	0.008	MATS1p	Moran autocorrelation - lag 1 / weighted by polarizabilities	2D
1515	0.001	0.01	TDB2r	3D topological distance based autocorrelation - lag 2 / weighted by covalent radius	3D
222	0.001	0.008	AATSC3e	Average centered Broto-Moreau autocorrelation - lag 3 / weighted by Sanderson electronegativities	2D
304	0.001	0.007	MATS2s	Moran autocorrelation - lag 2 / weighted by I-state	2D
389	0.001	0.007	VE3_Dzm	Logarithmic coefficient sum of the last eigenvector from Barysz matrix / weighted by mass	2D
1816	0.001	0.005	E2v	2nd component accessibility directional WHIM index / weighted by relative van der Waals volumes	3D
351	0.001	0.007	GATS1i	Geary autocorrelation - lag 1 / weighted by first ionization potential	2D
1175	0.001	0.014	ETA_Beta_ns	A measure of electron-richness of the molecule	2D
1548	0.001	0.006	RNCS	Relative negative charge surface area -- most negative surface area * RNCG	3D
1445	0.001	0.01	TDB2u	3D topological distance based autocorrelation - lag 2 / unweighted	3D
234	0.001	0.013	AATSC6p	Average centered Broto-Moreau autocorrelation - lag 6 / weighted by polarizabilities	2D
1475	0.001	0.01	TDB2e	3D topological distance based autocorrelation - lag 2 / weighted by Sanderson electronegativities	3D
132	0.001	0.006	ATSC3c	Centered Broto-Moreau autocorrelation - lag 3 / weighted by charges	2D
1450	0.001	0.009	TDB7u	3D topological distance based autocorrelation - lag 7 / unweighted	3D
491	0.001	0.01	SpMin8_Bhm	Smallest absolute eigenvalue of Burden modified matrix - n 8 / weighted by relative mass	2D
1543	0.001	0.016	WNSA-2	PNSA-2 * total molecular surface area / 1000	3D
153	0.001	0.009	ATSC6v	Centered Broto-Moreau autocorrelation - lag 6 / weighted by van der Waals volumes	2D
1730	0.001	0.008	RDF40i	Radial distribution function - 040 / weighted by relative first ionization potential	3D
493	0.001	0.015	SpMax2_Bhv	Largest absolute eigenvalue of Burden modified matrix - n 2 / weighted by relative van der Waals volumes	2D
634	0.001	0.006	AVP-5	Average valence path, order 5	2D
1766	0.001	0.017	RDF70s	Radial distribution function - 070 / weighted by relative I-state	3D
629	0.001	0.007	AVP-0	Average valence path, order 0	2D
533	0.001	0.01	SpMin2_Bhp	Smallest absolute eigenvalue of Burden modified matrix - n 2 / weighted by relative polarizabilities	2D
1233	0.001	0.008	BIC5	Bond information content index (neighborhood symmetry of 5-order)	2D
245	0.001	0.007	AATSC8i	Average centered Broto-Moreau autocorrelation - lag 8 / weighted by first ionization potential	2D
362	0.001	0.007	GATS4s	Geary autocorrelation - lag 4 / weighted by I-state	2D
1796	0.001	0.008	Du	D total accessibility index / unweighted	3D
150	0.001	0.007	ATSC3v	Centered Broto-Moreau autocorrelation - lag 3 / weighted by van der Waals volumes	2D
1842	0.001	0.007	E2p	2nd component accessibility directional WHIM index / weighted by relative polarizabilities	3D
1371	0.001	0.007	RotBFrac	Fraction of rotatable bonds, excluding terminal bonds	2D
558	0.001	0.014	SpMax3_Bhs	Largest absolute eigenvalue of Burden modified matrix - n 3 / weighted by relative I-state	2D
462	0.001	0.009	BCUTc-1h	nlow highest partial charge weighted BCUTS	2D
439	0.001	0.007	VE1_Dzi	Coefficient sum of the last eigenvector from Barysz matrix / weighted by first ionization potential	2D
1234	0.001	0.007	MIC0	Modified information content index (neighborhood symmetry of 0-order)	2D
1758	0.001	0.007	RDF30s	Radial distribution function - 030 / weighted by relative I-state	3D
417	0.001	0.006	VR2_Dze	Normalized Randic-like eigenvector-based index from Barysz matrix / weighted by Sanderson electronegativities	2D
143	0.001	0.006	ATSC5m	Centered Broto-Moreau autocorrelation - lag 5 / weighted by mass	2D
1409	0.001	0.015	VR3_D	Logarithmic Randic-like eigenvector-based index from topological distance matrix	2D
1861	0.001	0.007	Di	D total accessibility index / weighted by relative first ionization potential	3D
636	0.001	0.005	AVP-7	Average valence path, order 7	2D
530	0.001	0.017	SpMax7_Bhp	Largest absolute eigenvalue of Burden modified matrix - n 7 / weighted by relative polarizabilities	2D
316	0.001	0.007	GATS6c	Geary autocorrelation - lag 6 / weighted by charges	2D
1153	0.001	0.009	ETA_AlphaP	Sum of alpha values of all non-hydrogen vertices of a molecule relative to molecular size	2D
76	0.001	0.008	AATS1m	Average Broto-Moreau autocorrelation - lag 1 / weighted by mass	2D
1164	0.001	0.005	ETA_dEpsilon_D	A measure of contribution of hydrogen bond donor atoms	2D
460	0.001	0.009	BCUTw-1h	nlow highest atom weighted BCUTS	2D
294	0.001	0.009	MATS8p	Moran autocorrelation - lag 8 / weighted by polarizabilities	2D
1229	0.001	0.006	BIC1	Bond information content index (neighborhood symmetry of 1-order)	2D
1765	0.001	0.014	RDF65s	Radial distribution function - 065 / weighted by relative I-state	3D
352	0.001	0.005	GATS2i	Geary autocorrelation - lag 2 / weighted by first ionization potential	2D
423	0.001	0.007	SpMAD_Dzp	Spectral mean absolute deviation from Barysz matrix / weighted by polarizabilities	2D
224	0.001	0.007	AATSC5e	Average centered Broto-Moreau autocorrelation - lag 5 / weighted by Sanderson electronegativities	2D
1465	0.001	0.008	TDB2v	3D topological distance based autocorrelation - lag 2 / weighted by van der Waals volumes	3D
1545	0.001	0.004	RPCG	Relative positive charge -- most positive charge / total positive charge	3D
387	0.001	0.007	VE1_Dzm	Coefficient sum of the last eigenvector from Barysz matrix / weighted by mass	2D
265	0.001	0.007	MATS3m	Moran autocorrelation - lag 3 / weighted by mass	2D
1498	0.001	0.006	TDB5i	3D topological distance based autocorrelation - lag 5 / weighted by first ionization potential	3D
942	0.001	0.008	minssCH2	Minimum atom-type E-State: -CH2-	2D
1803	0.001	0.006	E2m	2nd component accessibility directional WHIM index / weighted by relative mass	3D
168	0.001	0.005	ATSC3p	Centered Broto-Moreau autocorrelation - lag 3 / weighted by polarizabilities	2D
400	0.001	0.006	VE1_Dzv	Coefficient sum of the last eigenvector from Barysz matrix / weighted by van der Waals volumes	2D
1446	0.001	0.006	TDB3u	3D topological distance based autocorrelation - lag 3 / unweighted	3D
239	0.001	0.005	AATSC2i	Average centered Broto-Moreau autocorrelation - lag 2 / weighted by first ionization potential	2D
115	0.001	0.005	AATS4i	Average Broto-Moreau autocorrelation - lag 4 / weighted by first ionization potential	2D
334	0.001	0.009	GATS8v	Geary autocorrelation - lag 8 / weighted by van der Waals volumes	2D
290	0.001	0.006	MATS4p	Moran autocorrelation - lag 4 / weighted by polarizabilities	2D
1192	0.001	0.007	ETA_EtaP_B	Branching index EtaB relative to molecular size	2D
513	0.001	0.014	SpMax6_Bhe	Largest absolute eigenvalue of Burden modified matrix - n 6 / weighted by relative Sanderson electronegativities	2D
550	0.001	0.013	SpMin3_Bhi	Smallest absolute eigenvalue of Burden modified matrix - n 3 / weighted by relative first ionization potential	2D
1181	0.001	0.009	ETA_Eta	Composite index Eta	2D
177	0.001	0.006	ATSC3i	Centered Broto-Moreau autocorrelation - lag 3 / weighted by first ionization potential	2D
178	0.001	0.006	ATSC4i	Centered Broto-Moreau autocorrelation - lag 4 / weighted by first ionization potential	2D
1	0.001	0.006	ALogP	Ghose-Crippen LogKow	2D
440	0.001	0.006	VE2_Dzi	Average coefficient sum of the last eigenvector from Barysz matrix / weighted by first ionization potential	2D
1830	0.001	0.009	E3e	3rd component accessibility directional WHIM index / weighted by relative Sanderson electronegativities	3D
278	0.001	0.006	MATS8v	Moran autocorrelation - lag 8 / weighted by van der Waals volumes	2D
173	0.001	0.007	ATSC8p	Centered Broto-Moreau autocorrelation - lag 8 / weighted by polarizabilities	2D
274	0.001	0.006	MATS4v	Moran autocorrelation - lag 4 / weighted by van der Waals volumes	2D
319	0.001	0.005	GATS1m	Geary autocorrelation - lag 1 / weighted by mass	2D
1786	0.001	0.015	L3u	3rd component size directional WHIM index / unweighted	3D
189	0.001	0.005	ATSC6s	Centered Broto-Moreau autocorrelation - lag 6 / weighted by I-state	2D
126	0.001	0.007	AATS6s	Average Broto-Moreau autocorrelation - lag 6 / weighted by I-state	2D
315	0.001	0.005	GATS5c	Geary autocorrelation - lag 5 / weighted by charges	2D
89	0.001	0.016	AATS5v	Average Broto-Moreau autocorrelation - lag 5 / weighted by van der Waals volumes	2D
1144	0.001	0.008	gmin	Minimum E-State	2D
626	0.001	0.006	VP-5	Valence path, order 5	2D
1208	0.001	0.008	IC4	Information content index (neighborhood symmetry of 4-order)	2D
1497	0.001	0.007	TDB4i	3D topological distance based autocorrelation - lag 4 / weighted by first ionization potential	3D
1476	0.001	0.006	TDB3e	3D topological distance based autocorrelation - lag 3 / weighted by Sanderson electronegativities	3D
620	0.001	0.006	ASP-7	Average simple path, order 7	2D
120	0.001	0.005	AATS0s	Average Broto-Moreau autocorrelation - lag 0 / weighted by I-state	2D
848	0.001	0.007	SsOH	Sum of atom-type E-State: -OH	2D
570	0.001	0.006	SpMin7_Bhs	Smallest absolute eigenvalue of Burden modified matrix - n 7 / weighted by relative I-state	2D
175	0.001	0.007	ATSC1i	Centered Broto-Moreau autocorrelation - lag 1 / weighted by first ionization potential	2D
1223	0.001	0.007	CIC1	Complementary information content index (neighborhood symmetry of 1-order)	2D
656	0.001	0.005	VE1_Dt	Coefficient sum of the last eigenvector from detour matrix	2D
223	0.001	0.008	AATSC4e	Average centered Broto-Moreau autocorrelation - lag 4 / weighted by Sanderson electronegativities	2D
1149	0.001	0.013	MAXDN2	Maximum negative intrinsic state di�fference in the molecule (related to the nucleophilicity of the molecule). Using deltaV = Zv-maxBondedHydrogens. Gramatica, P., Corradi, M., and Consonni, V. (2000). Modelling and prediction of soil sorption coefficients of non-ionic organic pesticides by molecular descriptors. Chemosphere 41, 763-777.	2D
1405	0.001	0.007	VE2_D	Average coefficient sum of the last eigenvector from topological distance matrix	2D
1801	0.001	0.006	P2m	2nd component shape directional WHIM index / weighted by relative mass	3D
484	0.001	0.008	SpMin1_Bhm	Smallest absolute eigenvalue of Burden modified matrix - n 1 / weighted by relative mass	2D
1791	0.001	0.005	E3u	3rd component accessibility directional WHIM index / unweighted	3D
1617	0.001	0.006	RDF75m	Radial distribution function - 075 / weighted by relative mass	3D
633	0.001	0.004	AVP-4	Average valence path, order 4	2D
180	0.001	0.007	ATSC6i	Centered Broto-Moreau autocorrelation - lag 6 / weighted by first ionization potential	2D
795	0.001	0.009	SHsOH	Sum of atom-type H E-State: -OH	2D
430	0.001	0.004	VR2_Dzp	Normalized Randic-like eigenvector-based index from Barysz matrix / weighted by polarizabilities	2D
255	0.001	0.004	MATS1c	Moran autocorrelation - lag 1 / weighted by charges	2D
545	0.001	0.015	SpMax6_Bhi	Largest absolute eigenvalue of Burden modified matrix - n 6 / weighted by relative first ionization potential	2D
103	0.001	0.005	AATS1p	Average Broto-Moreau autocorrelation - lag 1 / weighted by polarizabilities	2D
821	0.001	0.005	SsCH3	Sum of atom-type E-State: -CH3	2D
160	0.001	0.007	ATSC4e	Centered Broto-Moreau autocorrelation - lag 4 / weighted by Sanderson electronegativities	2D
447	0.001	0.014	SpDiam_Dzs	Spectral diameter from Barysz matrix / weighted by I-state	2D
1539	0.001	0.006	WPSA-1	PPSA-1 * total molecular surface area / 1000	3D
322	0.001	0.005	GATS4m	Geary autocorrelation - lag 4 / weighted by mass	2D
325	0.001	0.008	GATS7m	Geary autocorrelation - lag 7 / weighted by mass	2D
641	0.001	0.015	Sp	Sum of atomic polarizabilities (scaled on carbon atom)	2D
1760	0.001	0.006	RDF40s	Radial distribution function - 040 / weighted by relative I-state	3D
279	0.001	0.005	MATS1e	Moran autocorrelation - lag 1 / weighted by Sanderson electronegativities	2D
1454	0.001	0.006	TDB1m	3D topological distance based autocorrelation - lag 1 / weighted by mass	3D
1385	0.001	0.014	GGI8	Topological charge index of order 8	2D
155	0.001	0.007	ATSC8v	Centered Broto-Moreau autocorrelation - lag 8 / weighted by van der Waals volumes	2D
1145	0.001	0.006	LipoaffinityIndex	Lipoaffinity index	2D
615	0.001	0.006	ASP-2	Average simple path, order 2	2D
1426	0.001	0.005	SRW5	Self-returning walk count of order 5 (ln(1+x)	2D
1438	0.001	0.005	WTPT-4	Sum of path lengths starting from oxygens	2D
1059	0.001	0.005	maxsCH3	Maximum atom-type E-State: -CH3	2D
1219	0.001	0.007	SIC3	Structural information content index (neighborhood symmetry of 3-order)	2D
1806	0.001	0.014	Am	A total size index / weighted by relative mass	3D
1499	0.001	0.006	TDB6i	3D topological distance based autocorrelation - lag 6 / weighted by first ionization potential	3D
1293	0.001	0.014	piPC5	Conventional bond order ID number of order 5 (ln(1+x)	2D
1448	0.001	0.006	TDB5u	3D topological distance based autocorrelation - lag 5 / unweighted	3D
101	0.001	0.006	AATS8e	Average Broto-Moreau autocorrelation - lag 8 / weighted by Sanderson electronegativities	2D
1524	0.001	0.006	PPSA-1	Partial positive surface area -- sum of surface area on positive parts of molecule	3D
1567	0.001	0.004	MOMI-XY	X/Y	3D
243	0.001	0.007	AATSC6i	Average centered Broto-Moreau autocorrelation - lag 6 / weighted by first ionization potential	2D
308	0.001	0.006	MATS6s	Moran autocorrelation - lag 6 / weighted by I-state	2D
159	0.001	0.004	ATSC3e	Centered Broto-Moreau autocorrelation - lag 3 / weighted by Sanderson electronegativities	2D
607	0.001	0.014	SP-2	Simple path, order 2	2D
1870	0.001	0.006	Ts	T total size index / weighted by relative I-state	3D
1050	0.001	0.008	maxHother	Maximum atom-type H E-State: H�on aaCH, dCH2 or dsCH	2D
236	0.001	0.006	AATSC8p	Average centered Broto-Moreau autocorrelation - lag 8 / weighted by polarizabilities	2D
291	0.001	0.005	MATS5p	Moran autocorrelation - lag 5 / weighted by polarizabilities	2D
1168	0.001	0.004	ETA_Shape_P	Shape index P	2D
1526	0.001	0.004	PPSA-3	Charge weighted partial positive surface area	3D
112	0.001	0.005	AATS1i	Average Broto-Moreau autocorrelation - lag 1 / weighted by first ionization potential	2D
1484	0.001	0.006	TDB1p	3D topological distance based autocorrelation - lag 1 / weighted by polarizabilities	3D
446	0.001	0.013	SpMax_Dzs	Leading eigenvalue from Barysz matrix / weighted by I-state	2D
1177	0.001	0.004	ETA_dBeta	A measure of relative unsaturation content	2D
630	0.001	0.005	AVP-1	Average valence path, order 1	2D
1516	0.001	0.008	TDB3r	3D topological distance based autocorrelation - lag 3 / weighted by covalent radius	3D
1459	0.001	0.006	TDB6m	3D topological distance based autocorrelation - lag 6 / weighted by mass	3D
296	0.001	0.006	MATS2i	Moran autocorrelation - lag 2 / weighted by first ionization potential	2D
450	0.001	0.013	EE_Dzs	Estrada-like index from Barysz matrix / weighted by I-state (ln(1+x))	2D
509	0.001	0.012	SpMax2_Bhe	Largest absolute eigenvalue of Burden modified matrix - n 2 / weighted by relative Sanderson electronegativities	2D
1799	0.001	0.005	L3m	3rd component size directional WHIM index / weighted by relative mass	3D
298	0.001	0.006	MATS4i	Moran autocorrelation - lag 4 / weighted by first ionization potential	2D
95	0.001	0.008	AATS2e	Average Broto-Moreau autocorrelation - lag 2 / weighted by Sanderson electronegativities	2D
454	0.001	0.005	VE3_Dzs	Logarithmic coefficient sum of the last eigenvector from Barysz matrix / weighted by I-state	2D
1561	0.001	0.006	GRAV-6	Cube root of gravitational index of all pairs of atoms (not just bonded pairs)	3D
318	0.001	0.007	GATS8c	Geary autocorrelation - lag 8 / weighted by charges	2D
237	0.001	0.005	AATSC0i	Average centered Broto-Moreau autocorrelation - lag 0 / weighted by first ionization potential	2D
83	0.001	0.007	AATS8m	Average Broto-Moreau autocorrelation - lag 8 / weighted by mass	2D
130	0.001	0.007	ATSC1c	Centered Broto-Moreau autocorrelation - lag 1 / weighted by charges	2D
119	0.001	0.005	AATS8i	Average Broto-Moreau autocorrelation - lag 8 / weighted by first ionization potential	2D
373	0.001	0.004	SM1_DzZ	Spectral moment of order 1 from Barysz matrix / weighted by atomic number	2D
452	0.001	0.005	VE1_Dzs	Coefficient sum of the last eigenvector from Barysz matrix / weighted by I-state	2D
312	0.001	0.006	GATS2c	Geary autocorrelation - lag 2 / weighted by charges	2D
1271	0.001	0.008	MDEN-23	Molecular distance edge between all secondary and tertiary nitrogens	2D
324	0.001	0.007	GATS6m	Geary autocorrelation - lag 6 / weighted by mass	2D
1513	0.001	0.007	TDB10s	3D topological distance based autocorrelation - lag 10 / weighted by I-state	3D
1226	0.001	0.005	CIC4	Complementary information content index (neighborhood symmetry of 4-order)	2D
192	0.001	0.004	AATSC0c	Average centered Broto-Moreau autocorrelation - lag 0 / weighted by charges	2D
1432	0.001	0.013	TSRW	Total self-return walk count (up to order 10) (ln(1+x))	2D
616	0.001	0.004	ASP-3	Average simple path, order 3	2D
138	0.001	0.005	ATSC0m	Centered Broto-Moreau autocorrelation - lag 0 / weighted by mass	2D
1427	0.001	0.012	SRW6	Self-returning walk count of order 6 (ln(1+x)	2D
282	0.001	0.007	MATS4e	Moran autocorrelation - lag 4 / weighted by Sanderson electronegativities	2D
285	0.001	0.006	MATS7e	Moran autocorrelation - lag 7 / weighted by Sanderson electronegativities	2D
1294	0.001	0.012	piPC6	Conventional bond order ID number of order 6 (ln(1+x)	2D
1391	0.001	0.006	JGI4	Mean topological charge index of order 4	2D
1764	0.001	0.006	RDF60s	Radial distribution function - 060 / weighted by relative I-state	3D
1696	0.001	0.005	RDF20p	Radial distribution function - 020 / weighted by relative polarizabilities	3D
295	0.001	0.004	MATS1i	Moran autocorrelation - lag 1 / weighted by first ionization potential	2D
568	0.001	0.004	SpMin5_Bhs	Smallest absolute eigenvalue of Burden modified matrix - n 5 / weighted by relative I-state	2D
1535	0.001	0.004	FPSA-3	PPSA-3 / total molecular surface area	3D
1404	0.001	0.006	VE1_D	Coefficient sum of the last eigenvector from topological distance matrix	2D
1841	0.001	0.004	E1p	1st component accessibility directional WHIM index / weighted by relative polarizabilities	3D
1763	0.001	0.005	RDF55s	Radial distribution function - 055 / weighted by relative I-state	3D
522	0.001	0.007	SpMin7_Bhe	Smallest absolute eigenvalue of Burden modified matrix - n 7 / weighted by relative Sanderson electronegativities	2D
1860	0.001	0.005	Ki	K global shape index / weighted by relative first ionization potential	3D
252	0.001	0.005	AATSC6s	Average centered Broto-Moreau autocorrelation - lag 6 / weighted by I-state	2D
238	0.001	0.005	AATSC1i	Average centered Broto-Moreau autocorrelation - lag 1 / weighted by first ionization potential	2D
448	0.001	0.012	SpAD_Dzs	Spectral absolute deviation from Barysz matrix / weighted by I-state	2D
249	0.001	0.004	AATSC3s	Average centered Broto-Moreau autocorrelation - lag 3 / weighted by I-state	2D
364	0.001	0.005	GATS6s	Geary autocorrelation - lag 6 / weighted by I-state	2D
445	0.001	0.012	SpAbs_Dzs	Graph energy from Barysz matrix / weighted by I-state	2D
1506	0.001	0.004	TDB3s	3D topological distance based autocorrelation - lag 3 / weighted by I-state	3D
171	0.001	0.006	ATSC6p	Centered Broto-Moreau autocorrelation - lag 6 / weighted by polarizabilities	2D
201	0.001	0.004	AATSC0m	Average centered Broto-Moreau autocorrelation - lag 0 / weighted by mass	2D
1204	0.001	0.005	IC0	Information content index (neighborhood symmetry of 0-order)	2D
1256	0.001	0.007	MDEC-13	Molecular distance edge between all primary and tertiary carbons	2D
1237	0.001	0.006	MIC3	Modified information content index (neighborhood symmetry of 3-order)	2D
1576	0.001	0.005	RDF20u	Radial distribution function - 020 / unweighted	3D
427	0.001	0.005	VE2_Dzp	Average coefficient sum of the last eigenvector from Barysz matrix / weighted by polarizabilities	2D
354	0.001	0.005	GATS4i	Geary autocorrelation - lag 4 / weighted by first ionization potential	2D
1388	0.001	0.004	JGI1	Mean topological charge index of order 1	2D
1551	0.001	0.005	RHSA	THSA / total molecular surface area	3D
1408	0.001	0.004	VR2_D	Normalized Randic-like eigenvector-based index from topological distance matrix	2D
84	0.001	0.008	AATS0v	Average Broto-Moreau autocorrelation - lag 0 / weighted by van der Waals volumes	2D
1227	0.001	0.004	CIC5	Complementary information content index (neighborhood symmetry of 5-order)	2D
532	0.001	0.007	SpMin1_Bhp	Smallest absolute eigenvalue of Burden modified matrix - n 1 / weighted by relative polarizabilities	2D
82	0.001	0.006	AATS7m	Average Broto-Moreau autocorrelation - lag 7 / weighted by mass	2D
96	0.001	0.004	AATS3e	Average Broto-Moreau autocorrelation - lag 3 / weighted by Sanderson electronegativities	2D
331	0.001	0.007	GATS5v	Geary autocorrelation - lag 5 / weighted by van der Waals volumes	2D
456	0.001	0.004	VR2_Dzs	Normalized Randic-like eigenvector-based index from Barysz matrix / weighted by I-state	2D
593	0.001	0.005	SC-5	Simple cluster, order 5	2D
264	0.001	0.005	MATS2m	Moran autocorrelation - lag 2 / weighted by mass	2D
1837	0.001	0.006	L2p	2nd component size directional WHIM index / weighted by relative polarizabilities	3D
1759	0.001	0.005	RDF35s	Radial distribution function - 035 / weighted by relative I-state	3D
1492	0.001	0.007	TDB9p	3D topological distance based autocorrelation - lag 9 / weighted by polarizabilities	3D
506	0.001	0.006	SpMin7_Bhv	Smallest absolute eigenvalue of Burden modified matrix - n 7 / weighted by relative van der Waals volumes	2D
1854	0.001	0.003	E1i	1st component accessibility directional WHIM index / weighted by relative first ionization potential	3D
268	0.001	0.007	MATS6m	Moran autocorrelation - lag 6 / weighted by mass	2D
280	0.001	0.006	MATS2e	Moran autocorrelation - lag 2 / weighted by Sanderson electronegativities	2D
792	0.001	0.006	SHBint8	Sum of E-State descriptors of strength for potential hydrogen bonds of path length 8	2D
1217	0.001	0.006	SIC1	Structural information content index (neighborhood symmetry of 1-order)	2D
230	0.001	0.005	AATSC2p	Average centered Broto-Moreau autocorrelation - lag 2 / weighted by polarizabilities	2D
1530	0.001	0.005	DPSA-1	Difference of PPSA-1 and PNSA-1	3D
289	0.001	0.004	MATS3p	Moran autocorrelation - lag 3 / weighted by polarizabilities	2D
305	0.001	0.003	MATS3s	Moran autocorrelation - lag 3 / weighted by I-state	2D
613	0.001	0.005	ASP-0	Average simple path, order 0	2D
1789	0.001	0.004	E1u	1st component accessibility directional WHIM index / unweighted	3D
1815	0.001	0.005	E1v	1st component accessibility directional WHIM index / weighted by relative van der Waals volumes	3D
23	0.001	0.006	ATS2m	Broto-Moreau autocorrelation - lag 2 / weighted by mass	2D
336	0.001	0.005	GATS2e	Geary autocorrelation - lag 2 / weighted by Sanderson electronegativities	2D
1261	0.001	0.005	MDEC-33	Molecular distance edge between all tertiary carbons	2D
949	0.001	0.006	mindssC	Minimum atom-type E-State: =C<	2D
632	0.001	0.004	AVP-3	Average valence path, order 3	2D
1216	0.001	0.009	SIC0	Structural information content index (neighborhood symmetry of 0-order)	2D
1840	0.001	0.006	P2p	2nd component shape directional WHIM index / weighted by relative polarizabilities	3D
229	0.001	0.006	AATSC1p	Average centered Broto-Moreau autocorrelation - lag 1 / weighted by polarizabilities	2D
214	0.001	0.004	AATSC4v	Average centered Broto-Moreau autocorrelation - lag 4 / weighted by van der Waals volumes	2D
226	0.001	0.008	AATSC7e	Average centered Broto-Moreau autocorrelation - lag 7 / weighted by Sanderson electronegativities	2D
1392	0.001	0.004	JGI5	Mean topological charge index of order 5	2D
179	0	0.004	ATSC5i	Centered Broto-Moreau autocorrelation - lag 5 / weighted by first ionization potential	2D
524	0	0.006	SpMax1_Bhp	Largest absolute eigenvalue of Burden modified matrix - n 1 / weighted by relative polarizabilities	2D
968	0	0.005	mindO	Minimum atom-type E-State: =O	2D
211	0	0.005	AATSC1v	Average centered Broto-Moreau autocorrelation - lag 1 / weighted by van der Waals volumes	2D
414	0	0.004	VE2_Dze	Average coefficient sum of the last eigenvector from Barysz matrix / weighted by Sanderson electronegativities	2D
339	0	0.003	GATS5e	Geary autocorrelation - lag 5 / weighted by Sanderson electronegativities	2D
415	0	0.003	VE3_Dze	Logarithmic coefficient sum of the last eigenvector from Barysz matrix / weighted by Sanderson electronegativities	2D
441	0	0.003	VE3_Dzi	Logarithmic coefficient sum of the last eigenvector from Barysz matrix / weighted by first ionization potential	2D
267	0	0.005	MATS5m	Moran autocorrelation - lag 5 / weighted by mass	2D
1203	0	0.003	HybRatio	Fraction of sp3 carbons to sp2 carbons	2D
431	0	0.004	VR3_Dzp	Logarithmic Randic-like eigenvector-based index from Barysz matrix / weighted by polarizabilities	2D
375	0	0.004	VE2_DzZ	Average coefficient sum of the last eigenvector from Barysz matrix / weighted by atomic number	2D
1156	0	0.006	ETA_Epsilon_1	A measure of electronegative atom count	2D
784	0	0.005	SHBa	Sum of E-States for (strong) hydrogen bond acceptors	2D
1867	0	0.004	E1s	1st component accessibility directional WHIM index / weighted by relative I-state	3D
665	0	0.006	nHBa	Count of E-States for (strong) Hydrogen Bond acceptors	2D
232	0	0.005	AATSC4p	Average centered Broto-Moreau autocorrelation - lag 4 / weighted by polarizabilities	2D
256	0	0.003	MATS2c	Moran autocorrelation - lag 2 / weighted by charges	2D
248	0	0.005	AATSC2s	Average centered Broto-Moreau autocorrelation - lag 2 / weighted by I-state	2D
1761	0	0.005	RDF45s	Radial distribution function - 045 / weighted by relative I-state	3D
323	0	0.003	GATS5m	Geary autocorrelation - lag 5 / weighted by mass	2D
1157	0	0.003	ETA_Epsilon_2	A measure of electronegative atom count	2D
1757	0	0.004	RDF25s	Radial distribution function - 025 / weighted by relative I-state	3D
337	0	0.003	GATS3e	Geary autocorrelation - lag 3 / weighted by Sanderson electronegativities	2D
578	0	0.005	C2SP3	Singly bound carbon bound to two other carbons	2D
566	0	0.005	SpMin3_Bhs	Smallest absolute eigenvalue of Burden modified matrix - n 3 / weighted by relative I-state	2D
335	0	0.003	GATS1e	Geary autocorrelation - lag 1 / weighted by Sanderson electronegativities	2D
1390	0	0.003	JGI3	Mean topological charge index of order 3	2D
571	0	0.004	SpMin8_Bhs	Smallest absolute eigenvalue of Burden modified matrix - n 8 / weighted by relative I-state	2D
271	0	0.005	MATS1v	Moran autocorrelation - lag 1 / weighted by van der Waals volumes	2D
136	0	0.005	ATSC7c	Centered Broto-Moreau autocorrelation - lag 7 / weighted by charges	2D
565	0	0.01	SpMin2_Bhs	Smallest absolute eigenvalue of Burden modified matrix - n 2 / weighted by relative I-state	2D
386	0	0.005	SM1_Dzm	Spectral moment of order 1 from Barysz matrix / weighted by mass	2D
1517	0	0.005	TDB4r	3D topological distance based autocorrelation - lag 4 / weighted by covalent radius	3D
1550	0	0.004	TPSA	Sum of solvent accessible surface areas of atoms with absolute value of partial charges greater than or equal 0.2	3D
131	0	0.003	ATSC2c	Centered Broto-Moreau autocorrelation - lag 2 / weighted by charges	2D
1698	0	0.004	RDF30p	Radial distribution function - 030 / weighted by relative polarizabilities	3D
197	0	0.006	AATSC5c	Average centered Broto-Moreau autocorrelation - lag 5 / weighted by charges	2D
1209	0	0.005	IC5	Information content index (neighborhood symmetry of 5-order)	2D
139	0	0.003	ATSC1m	Centered Broto-Moreau autocorrelation - lag 1 / weighted by mass	2D
213	0	0.005	AATSC3v	Average centered Broto-Moreau autocorrelation - lag 3 / weighted by van der Waals volumes	2D
1501	0	0.006	TDB8i	3D topological distance based autocorrelation - lag 8 / weighted by first ionization potential	3D
1754	0	0.003	RDF10s	Radial distribution function - 010 / weighted by relative I-state	3D
1482	0	0.005	TDB9e	3D topological distance based autocorrelation - lag 9 / weighted by Sanderson electronegativities	3D
1485	0	0.004	TDB2p	3D topological distance based autocorrelation - lag 2 / weighted by polarizabilities	3D
1834	0	0.005	Ke	K global shape index / weighted by relative Sanderson electronegativities	3D
1563	0	0.003	LOBMIN	The L/B ratio for the rotation that results in the minimum area	3D
1221	0	0.004	SIC5	Structural information content index (neighborhood symmetry of 5-order)	2D
1798	0	0.006	L2m	2nd component size directional WHIM index / weighted by relative mass	3D
342	0	0.005	GATS8e	Geary autocorrelation - lag 8 / weighted by Sanderson electronegativities	2D
1529	0	0.004	PNSA-3	Charge weighted partial negative surface area	3D
1300	0	0.004	R_TpiPCTPC	Ratio of total conventional bond order (up to order 10) with total path count (up to order 10)	2D
1269	0	0.005	MDEN-13	Molecular distance edge between all primary and tertiary niroqens	2D
330	0	0.004	GATS4v	Geary autocorrelation - lag 4 / weighted by van der Waals volumes	2D
552	0	0.004	SpMin5_Bhi	Smallest absolute eigenvalue of Burden modified matrix - n 5 / weighted by relative first ionization potential	2D
508	0	0.004	SpMax1_Bhe	Largest absolute eigenvalue of Burden modified matrix - n 1 / weighted by relative Sanderson electronegativities	2D
504	0	0.004	SpMin5_Bhv	Smallest absolute eigenvalue of Burden modified matrix - n 5 / weighted by relative van der Waals volumes	2D
148	0	0.003	ATSC1v	Centered Broto-Moreau autocorrelation - lag 1 / weighted by van der Waals volumes	2D
1479	0	0.004	TDB6e	3D topological distance based autocorrelation - lag 6 / weighted by Sanderson electronegativities	3D
1225	0	0.004	CIC3	Complementary information content index (neighborhood symmetry of 3-order)	2D
88	0	0.004	AATS4v	Average Broto-Moreau autocorrelation - lag 4 / weighted by van der Waals volumes	2D
186	0	0.003	ATSC3s	Centered Broto-Moreau autocorrelation - lag 3 / weighted by I-state	2D
1301	0	0.004	PetitjeanNumber	Petitjean number	2D
345	0	0.004	GATS3p	Geary autocorrelation - lag 3 / weighted by polarizabilities	2D
1169	0	0.004	ETA_Shape_Y	Shape index Y	2D
659	0	0.005	VR1_Dt	Randic-like eigenvector-based index from detour matrix	2D
116	0	0.004	AATS5i	Average Broto-Moreau autocorrelation - lag 5 / weighted by first ionization potential	2D
1534	0	0.004	FPSA-2	PPSA-2 / total molecular surface area	3D
647	0	0.004	Mp	Mean atomic polarizabilities (scaled on carbon atom)	2D
850	0	0.004	SssO	Sum of atom-type E-State: -O-	2D
404	0	0.005	VR2_Dzv	Normalized Randic-like eigenvector-based index from Barysz matrix / weighted by van der Waals volumes	2D
97	0	0.004	AATS4e	Average Broto-Moreau autocorrelation - lag 4 / weighted by Sanderson electronegativities	2D
328	0	0.003	GATS2v	Geary autocorrelation - lag 2 / weighted by van der Waals volumes	2D
1377	0	0.005	topoShape	Petitjean topological shape index	2D
1645	0	0.006	RDF65v	Radial distribution function - 065 / weighted by relative van der Waals volumes	3D
358	0	0.004	GATS8i	Geary autocorrelation - lag 8 / weighted by first ionization potential	2D
1275	0	0.003	MLFER_BO	Overall or summation solute hydrogen bond basicity	2D
110	0	0.006	AATS8p	Average Broto-Moreau autocorrelation - lag 8 / weighted by polarizabilities	2D
1639	0	0.006	RDF35v	Radial distribution function - 035 / weighted by relative van der Waals volumes	3D
1195	0	0.005	FMF	Complexity of a molecule	2D
551	0	0.004	SpMin4_Bhi	Smallest absolute eigenvalue of Burden modified matrix - n 4 / weighted by relative first ionization potential	2D
1729	0	0.005	RDF35i	Radial distribution function - 035 / weighted by relative first ionization potential	3D
283	0	0.005	MATS5e	Moran autocorrelation - lag 5 / weighted by Sanderson electronegativities	2D
1569	0	0.003	MOMI-YZ	Y/Z	3D
348	0	0.004	GATS6p	Geary autocorrelation - lag 6 / weighted by polarizabilities	2D
1182	0	0.003	ETA_EtaP	Composite index Eta relative to molecular size	2D
152	0	0.003	ATSC5v	Centered Broto-Moreau autocorrelation - lag 5 / weighted by van der Waals volumes	2D
1202	0	0.004	nHBDon_Lipinski	Number of hydrogen bond donors (using Lipinski's definition: Any OH or NH. Each available hydrogen atom is counted as one hydrogen bond donor)	2D
157	0	0.004	ATSC1e	Centered Broto-Moreau autocorrelation - lag 1 / weighted by Sanderson electronegativities	2D
1643	0	0.006	RDF55v	Radial distribution function - 055 / weighted by relative van der Waals volumes	3D
631	0	0.004	AVP-2	Average valence path, order 2	2D
374	0	0.004	VE1_DzZ	Coefficient sum of the last eigenvector from Barysz matrix / weighted by atomic number	2D
556	0	0.003	SpMax1_Bhs	Largest absolute eigenvalue of Burden modified matrix - n 1 / weighted by relative I-state	2D
487	0	0.005	SpMin4_Bhm	Smallest absolute eigenvalue of Burden modified matrix - n 4 / weighted by relative mass	2D
809	0	0.003	SHCsats	Sum of atom-type H E-State: H on C sp3 bonded to saturated C	2D
228	0	0.003	AATSC0p	Average centered Broto-Moreau autocorrelation - lag 0 / weighted by polarizabilities	2D
1502	0	0.004	TDB9i	3D topological distance based autocorrelation - lag 9 / weighted by first ionization potential	3D
1547	0	0.002	RPCS	Relative positive charge surface area -- most positive surface area * RPCG	3D
617	0	0.003	ASP-4	Average simple path, order 4	2D
1468	0	0.003	TDB5v	3D topological distance based autocorrelation - lag 5 / weighted by van der Waals volumes	3D
225	0	0.004	AATSC6e	Average centered Broto-Moreau autocorrelation - lag 6 / weighted by Sanderson electronegativities	2D
117	0	0.003	AATS6i	Average Broto-Moreau autocorrelation - lag 6 / weighted by first ionization potential	2D
1247	0	0.006	Kier2	Second kappa shape index	2D
1220	0	0.005	SIC4	Structural information content index (neighborhood symmetry of 4-order)	2D
1250	0	0.003	nAtomP	Number of atoms in the largest pi system	2D
873	0	0.006	SsCl	Sum of atom-type E-State: -Cl	2D
1044	0	0.004	maxHdsCH	Maximum atom-type H E-State: =CH-	2D
346	0	0.003	GATS4p	Geary autocorrelation - lag 4 / weighted by polarizabilities	2D
353	0	0.004	GATS3i	Geary autocorrelation - lag 3 / weighted by first ionization potential	2D
669	0	0.005	nHBint4	Count of E-State descriptors of strength for potential Hydrogen Bonds of path length 4	2D
125	0	0.003	AATS5s	Average Broto-Moreau autocorrelation - lag 5 / weighted by I-state	2D
1146	0	0.004	MAXDN	Maximum negative intrinsic state di�fference in the molecule (related to the nucleophilicity of the molecule). Using deltaV = (Zv-maxBondedHydrogens) /(atomicNumber-Zv-1). Gramatica, P., Corradi, M., and Consonni, V. (2000). Modelling and prediction of soil sorption coefficients of non-ionic organic pesticides by molecular descriptors. Chemosphere 41, 763-777.	2D
378	0	0.005	VR2_DzZ	Normalized Randic-like eigenvector-based index from Barysz matrix / weighted by atomic number	2D
969	0	0.004	minssO	Minimum atom-type E-State: -O-	2D
1394	0	0.004	JGI7	Mean topological charge index of order 7	2D
194	0	0.006	AATSC2c	Average centered Broto-Moreau autocorrelation - lag 2 / weighted by charges	2D
940	0	0.004	minsCH3	Minimum atom-type E-State: -CH3	2D
918	0	0.004	minHssNH	Minimum atom-type H E-State: -NH-	2D
590	0	0.003	VCH-7	Valence chain, order 7	2D
1604	0	0.003	RDF10m	Radial distribution function - 010 / weighted by relative mass	3D
1810	0	0.006	L1v	1st component size directional WHIM index / weighted by relative van der Waals volumes	3D
589	0	0.004	VCH-6	Valence chain, order 6	2D
1514	0	0.005	TDB1r	3D topological distance based autocorrelation - lag 1 / weighted by covalent radius	3D
217	0	0.004	AATSC7v	Average centered Broto-Moreau autocorrelation - lag 7 / weighted by van der Waals volumes	2D
657	0	0.003	VE2_Dt	Average coefficient sum of the last eigenvector from detour matrix	2D
1575	0	0.004	RDF15u	Radial distribution function - 015 / unweighted	3D
825	0	0.004	SdsCH	Sum of atom-type E-State: =CH-	2D
61	0	0.004	ATS4i	Broto-Moreau autocorrelation - lag 4 / weighted by first ionization potential	2D
1613	0	0.005	RDF55m	Radial distribution function - 055 / weighted by relative mass	3D
1466	0	0.006	TDB3v	3D topological distance based autocorrelation - lag 3 / weighted by van der Waals volumes	3D
12	0	0.004	nN	Number of nitrogen atoms	2D
327	0	0.006	GATS1v	Geary autocorrelation - lag 1 / weighted by van der Waals volumes	2D
1143	0	0.003	hmin	Minimum H E-State	2D
1787	0	0.006	P1u	1st component shape directional WHIM index / unweighted	3D
490	0	0.003	SpMin7_Bhm	Smallest absolute eigenvalue of Burden modified matrix - n 7 / weighted by relative mass	2D
105	0	0.005	AATS3p	Average Broto-Moreau autocorrelation - lag 3 / weighted by polarizabilities	2D
1544	0	0.003	WNSA-3	PNSA-3 * total molecular surface area / 1000	3D
1407	0	0.003	VR1_D	Randic-like eigenvector-based index from topological distance matrix	2D
276	0	0.003	MATS6v	Moran autocorrelation - lag 6 / weighted by van der Waals volumes	2D
100	0	0.004	AATS7e	Average Broto-Moreau autocorrelation - lag 7 / weighted by Sanderson electronegativities	2D
113	0	0.004	AATS2i	Average Broto-Moreau autocorrelation - lag 2 / weighted by first ionization potential	2D
149	0	0.003	ATSC2v	Centered Broto-Moreau autocorrelation - lag 2 / weighted by van der Waals volumes	2D
1061	0	0.005	maxssCH2	Maximum atom-type E-State: -CH2-	2D
297	0	0.003	MATS3i	Moran autocorrelation - lag 3 / weighted by first ionization potential	2D
166	0	0.005	ATSC1p	Centered Broto-Moreau autocorrelation - lag 1 / weighted by polarizabilities	2D
1490	0	0.006	TDB7p	3D topological distance based autocorrelation - lag 7 / weighted by polarizabilities	3D
270	0	0.005	MATS8m	Moran autocorrelation - lag 8 / weighted by mass	2D
1481	0	0.005	TDB8e	3D topological distance based autocorrelation - lag 8 / weighted by Sanderson electronegativities	3D
86	0	0.003	AATS2v	Average Broto-Moreau autocorrelation - lag 2 / weighted by van der Waals volumes	2D
129	0	0.004	ATSC0c	Centered Broto-Moreau autocorrelation - lag 0 / weighted by charges	2D
931	0	0.004	minHother	Minimum atom-type H E-State: H�on aaCH, dCH2 or dsCH	2D
1236	0	0.003	MIC2	Modified information content index (neighborhood symmetry of 2-order)	2D
241	0	0.003	AATSC4i	Average centered Broto-Moreau autocorrelation - lag 4 / weighted by first ionization potential	2D
1634	0	0.006	RDF10v	Radial distribution function - 010 / weighted by relative van der Waals volumes	3D
109	0	0.006	AATS7p	Average Broto-Moreau autocorrelation - lag 7 / weighted by polarizabilities	2D
1509	0	0.004	TDB6s	3D topological distance based autocorrelation - lag 6 / weighted by I-state	3D
1393	0	0.005	JGI6	Mean topological charge index of order 6	2D
1610	0	0.003	RDF40m	Radial distribution function - 040 / weighted by relative mass	3D
1671	0	0.004	RDF45e	Radial distribution function - 045 / weighted by relative Sanderson electronegativities	3D
575	0	0.005	C2SP2	Doubly bound carbon bound to two other carbons	2D
619	0	0.004	ASP-6	Average simple path, order 6	2D
99	0	0.003	AATS6e	Average Broto-Moreau autocorrelation - lag 6 / weighted by Sanderson electronegativities	2D
1694	0	0.005	RDF10p	Radial distribution function - 010 / weighted by relative polarizabilities	3D
904	0	0.004	minwHBa	Minimum E-States for weak Hydrogen Bond acceptors	2D
548	0	0.004	SpMin1_Bhi	Smallest absolute eigenvalue of Burden modified matrix - n 1 / weighted by relative first ionization potential	2D
1154	0	0.007	ETA_dAlpha_A	A measure of count of non-hydrogen heteroatoms	2D
70	0	0.003	ATS4s	Broto-Moreau autocorrelation - lag 4 / weighted by I-state	2D
66	0	0.003	ATS0s	Broto-Moreau autocorrelation - lag 0 / weighted by I-state	2D
429	0	0.004	VR1_Dzp	Randic-like eigenvector-based index from Barysz matrix / weighted by polarizabilities	2D
1086	0	0.007	maxsOH	Maximum atom-type E-State: -OH	2D
220	0	0.002	AATSC1e	Average centered Broto-Moreau autocorrelation - lag 1 / weighted by Sanderson electronegativities	2D
1488	0	0.005	TDB5p	3D topological distance based autocorrelation - lag 5 / weighted by polarizabilities	3D
1063	0	0.003	maxdsCH	Maximum atom-type E-State: =CH-	2D
844	0	0.006	SsssN	Sum of atom-type E-State: >N-	2D
1852	0	0.003	P1i	1st component shape directional WHIM index / weighted by relative first ionization potential	3D
1571	0	0.003	geomRadius	Geometrical radius (minimum geometric eccentricity)	3D
1205	0	0.003	IC1	Information content index (neighborhood symmetry of 1-order)	2D
543	0	0.005	SpMax4_Bhi	Largest absolute eigenvalue of Burden modified matrix - n 4 / weighted by relative first ionization potential	2D
455	0	0.003	VR1_Dzs	Randic-like eigenvector-based index from Barysz matrix / weighted by I-state	2D
1264	0	0.006	MDEO-11	Molecular distance edge between all primary oxygens	2D
127	0	0.003	AATS7s	Average Broto-Moreau autocorrelation - lag 7 / weighted by I-state	2D
1142	0	0.004	gmax	Maximum E-State	2D
534	0	0.002	SpMin3_Bhp	Smallest absolute eigenvalue of Burden modified matrix - n 3 / weighted by relative polarizabilities	2D
87	0	0.004	AATS3v	Average Broto-Moreau autocorrelation - lag 3 / weighted by van der Waals volumes	2D
1566	0	0.003	MOMI-Z	Moment of inertia along Z axis	3D
114	0	0.002	AATS3i	Average Broto-Moreau autocorrelation - lag 3 / weighted by first ionization potential	2D
1728	0	0.003	RDF30i	Radial distribution function - 030 / weighted by relative first ionization potential	3D
1373	0	0.003	RotBtFrac	Fraction of rotatable bonds, including terminal bonds	2D
184	0	0.004	ATSC1s	Centered Broto-Moreau autocorrelation - lag 1 / weighted by I-state	2D
1546	0	0.002	RNCG	Relative negative charge -- most negative charge / total negative charge	3D
1178	0	0.003	ETA_dBetaP	A measure of relative unsaturation content relative to molecular size	2D
98	0	0.003	AATS5e	Average Broto-Moreau autocorrelation - lag 5 / weighted by Sanderson electronegativities	2D
269	0	0.004	MATS7m	Moran autocorrelation - lag 7 / weighted by mass	2D
925	0	0.003	minHdsCH	Minimum atom-type H E-State: =CH-	2D
1708	0	0.006	RDF80p	Radial distribution function - 080 / weighted by relative polarizabilities	3D
1795	0	0.002	Ku	K global shape index / unweighted	3D
1372	0	0.003	nRotBt	Number of rotatable bonds, including terminal bonds	2D
1636	0	0.002	RDF20v	Radial distribution function - 020 / weighted by relative van der Waals volumes	3D
9	0	0.004	nH	Number of hydrogen atoms	2D
1560	0	0.003	GRAV-5	Square root of gravitational index of all pairs of atoms (not just bonded pairs)	3D
260	0	0.002	MATS6c	Moran autocorrelation - lag 6 / weighted by charges	2D
482	0	0.004	SpMax7_Bhm	Largest absolute eigenvalue of Burden modified matrix - n 7 / weighted by relative mass	2D
1762	0	0.004	RDF50s	Radial distribution function - 050 / weighted by relative I-state	3D
212	0	0.003	AATSC2v	Average centered Broto-Moreau autocorrelation - lag 2 / weighted by van der Waals volumes	2D
1823	0	0.004	L1e	1st component size directional WHIM index / weighted by relative Sanderson electronegativities	3D
536	0	0.003	SpMin5_Bhp	Smallest absolute eigenvalue of Burden modified matrix - n 5 / weighted by relative polarizabilities	2D
1396	0	0.005	JGI9	Mean topological charge index of order 9	2D
1532	0	0.003	DPSA-3	Difference of PPSA-3 and PNSA-3	3D
648	0	0.003	Mi	Mean first first ionization potentials (scaled on carbon atom)	2D
1260	0	0.003	MDEC-24	Molecular distance edge between all secondary and quaternary carbons	2D
240	0	0.003	AATSC3i	Average centered Broto-Moreau autocorrelation - lag 3 / weighted by first ionization potential	2D
538	0	0.003	SpMin7_Bhp	Smallest absolute eigenvalue of Burden modified matrix - n 7 / weighted by relative polarizabilities	2D
24	0	0.004	ATS3m	Broto-Moreau autocorrelation - lag 3 / weighted by mass	2D
80	0	0.004	AATS5m	Average Broto-Moreau autocorrelation - lag 5 / weighted by mass	2D
1590	0	0.006	RDF90u	Radial distribution function - 090 / unweighted	3D
1847	0	0.003	Kp	K global shape index / weighted by relative polarizabilities	3D
215	0	0.003	AATSC5v	Average centered Broto-Moreau autocorrelation - lag 5 / weighted by van der Waals volumes	2D
198	0	0.002	AATSC6c	Average centered Broto-Moreau autocorrelation - lag 6 / weighted by charges	2D
806	0	0.004	SHdsCH	Sum of atom-type H E-State: =CH-	2D
92	0	0.006	AATS8v	Average Broto-Moreau autocorrelation - lag 8 / weighted by van der Waals volumes	2D
596	0	0.003	VC-4	Valence cluster, order 4	2D
1813	0	0.003	P1v	1st component shape directional WHIM index / weighted by relative van der Waals volumes	3D
111	0	0.003	AATS0i	Average Broto-Moreau autocorrelation - lag 0 / weighted by first ionization potential	2D
1668	0	0.003	RDF30e	Radial distribution function - 030 / weighted by relative Sanderson electronegativities	3D
486	0	0.003	SpMin3_Bhm	Smallest absolute eigenvalue of Burden modified matrix - n 3 / weighted by relative mass	2D
313	0	0.003	GATS3c	Geary autocorrelation - lag 3 / weighted by charges	2D
1451	0	0.004	TDB8u	3D topological distance based autocorrelation - lag 8 / unweighted	3D
1489	0	0.003	TDB6p	3D topological distance based autocorrelation - lag 6 / weighted by polarizabilities	3D
785	0	0.002	SwHBa	Sum of E-States for weak hydrogen bond acceptors	2D
1464	0	0.002	TDB1v	3D topological distance based autocorrelation - lag 1 / weighted by van der Waals volumes	3D
1814	0	0.002	P2v	2nd component shape directional WHIM index / weighted by relative van der Waals volumes	3D
341	0	0.003	GATS7e	Geary autocorrelation - lag 7 / weighted by Sanderson electronegativities	2D
299	0	0.002	MATS5i	Moran autocorrelation - lag 5 / weighted by first ionization potential	2D
235	0	0.003	AATSC7p	Average centered Broto-Moreau autocorrelation - lag 7 / weighted by polarizabilities	2D
577	0	0.003	C1SP3	Singly bound carbon bound to one other carbon	2D
416	0	0.002	VR1_Dze	Randic-like eigenvector-based index from Barysz matrix / weighted by Sanderson electronegativities	2D
90	0	0.004	AATS6v	Average Broto-Moreau autocorrelation - lag 6 / weighted by van der Waals volumes	2D
1611	0	0.003	RDF45m	Radial distribution function - 045 / weighted by relative mass	3D
1249	0	0.003	nAtomLC	Number of atoms in the largest chain	2D
422	0	0.005	SpAD_Dzp	Spectral absolute deviation from Barysz matrix / weighted by polarizabilities	2D
1531	0	0.003	DPSA-2	Difference of FPSA-2 and PNSA-2	3D
1697	0	0.003	RDF25p	Radial distribution function - 025 / weighted by relative polarizabilities	3D
618	0	0.003	ASP-5	Average simple path, order 5	2D
242	0	0.003	AATSC5i	Average centered Broto-Moreau autocorrelation - lag 5 / weighted by first ionization potential	2D
355	0	0.003	GATS5i	Geary autocorrelation - lag 5 / weighted by first ionization potential	2D
233	0	0.002	AATSC5p	Average centered Broto-Moreau autocorrelation - lag 5 / weighted by polarizabilities	2D
525	0	0.003	SpMax2_Bhp	Largest absolute eigenvalue of Burden modified matrix - n 2 / weighted by relative polarizabilities	2D
193	0	0.003	AATSC1c	Average centered Broto-Moreau autocorrelation - lag 1 / weighted by charges	2D
310	0	0.002	MATS8s	Moran autocorrelation - lag 8 / weighted by I-state	2D
1726	0	0.002	RDF20i	Radial distribution function - 020 / weighted by relative first ionization potential	3D
106	0	0.003	AATS4p	Average Broto-Moreau autocorrelation - lag 4 / weighted by polarizabilities	2D
518	0	0.002	SpMin3_Bhe	Smallest absolute eigenvalue of Burden modified matrix - n 3 / weighted by relative Sanderson electronegativities	2D
1278	0	0.003	MLFER_L	Solute gas-hexadecane partition coefficient	2D
1635	0	0.003	RDF15v	Radial distribution function - 015 / weighted by relative van der Waals volumes	3D
782	0	0.004	SHBd	Sum of E-States for (strong) hydrogen bond donors	2D
1538	0	0.002	FNSA-3	PNSA-3 / total molecular surface area	3D
59	0	0.004	ATS2i	Broto-Moreau autocorrelation - lag 2 / weighted by first ionization potential	2D
557	0	0.002	SpMax2_Bhs	Largest absolute eigenvalue of Burden modified matrix - n 2 / weighted by relative I-state	2D
172	0	0.002	ATSC7p	Centered Broto-Moreau autocorrelation - lag 7 / weighted by polarizabilities	2D
158	0	0.003	ATSC2e	Centered Broto-Moreau autocorrelation - lag 2 / weighted by Sanderson electronegativities	2D
1568	0	0.002	MOMI-XZ	X/Z	3D
293	0	0.003	MATS7p	Moran autocorrelation - lag 7 / weighted by polarizabilities	2D
343	0	0.002	GATS1p	Geary autocorrelation - lag 1 / weighted by polarizabilities	2D
1865	0	0.004	P1s	1st component shape directional WHIM index / weighted by relative I-state	3D
1827	0	0.003	P2e	2nd component shape directional WHIM index / weighted by relative Sanderson electronegativities	3D
1266	0	0.003	MDEO-22	Molecular distance edge between all secondary oxygens	2D
1537	0	0.003	FNSA-2	PNSA-2 / total molecular surface area	3D
1068	0	0.002	maxdssC	Maximum atom-type E-State: =C<	2D
475	0	0.003	bpol	Sum of the absolute value of the difference between atomic polarizabilities of all bonded atoms in the molecule (including implicit hydrogens)	2D
599	0	0.004	SPC-4	Simple path cluster, order 4	2D
523	0	0.003	SpMin8_Bhe	Smallest absolute eigenvalue of Burden modified matrix - n 8 / weighted by relative Sanderson electronegativities	2D
1165	0	0.004	ETA_Psi_1	A measure of hydrogen bonding propensity of the molecules and/or polar surface area	2D
1091	0	0.003	maxsOm	Maximum atom-type E-State: -O-	2D
1536	0	0.002	FNSA-1	PNSA-1 / total molecular surface area	3D
1724	0	0.002	RDF10i	Radial distribution function - 010 / weighted by relative first ionization potential	3D
967	0	0.004	minsOH	Minimum atom-type E-State: -OH	2D
476	0	0.004	SpMax1_Bhm	Largest absolute eigenvalue of Burden modified matrix - n 1 / weighted by relative mass	2D
1583	0	0.002	RDF55u	Radial distribution function - 055 / unweighted	3D
1849	0	0.004	L1i	1st component size directional WHIM index / weighted by relative first ionization potential	3D
1449	0	0.002	TDB6u	3D topological distance based autocorrelation - lag 6 / unweighted	3D
344	0	0.002	GATS2p	Geary autocorrelation - lag 2 / weighted by polarizabilities	2D
1733	0	0.002	RDF55i	Radial distribution function - 055 / weighted by relative first ionization potential	3D
169	0	0.001	ATSC4p	Centered Broto-Moreau autocorrelation - lag 4 / weighted by polarizabilities	2D
1641	0	0.003	RDF45v	Radial distribution function - 045 / weighted by relative van der Waals volumes	3D
1638	0	0.002	RDF30v	Radial distribution function - 030 / weighted by relative van der Waals volumes	3D
555	0	0.003	SpMin8_Bhi	Smallest absolute eigenvalue of Burden modified matrix - n 8 / weighted by relative first ionization potential	2D
244	0	0.002	AATSC7i	Average centered Broto-Moreau autocorrelation - lag 7 / weighted by first ionization potential	2D
124	0	0.003	AATS4s	Average Broto-Moreau autocorrelation - lag 4 / weighted by I-state	2D
163	0	0.004	ATSC7e	Centered Broto-Moreau autocorrelation - lag 7 / weighted by Sanderson electronegativities	2D
1505	0	0.002	TDB2s	3D topological distance based autocorrelation - lag 2 / weighted by I-state	3D
257	0	0.002	MATS3c	Moran autocorrelation - lag 3 / weighted by charges	2D
1508	0	0.002	TDB5s	3D topological distance based autocorrelation - lag 5 / weighted by I-state	3D
376	0	0.002	VE3_DzZ	Logarithmic coefficient sum of the last eigenvector from Barysz matrix / weighted by atomic number	2D
1727	0	0.005	RDF25i	Radial distribution function - 025 / weighted by relative first ionization potential	3D
118	0	0.002	AATS7i	Average Broto-Moreau autocorrelation - lag 7 / weighted by first ionization potential	2D
371	0	0.005	SpMAD_DzZ	Spectral mean absolute deviation from Barysz matrix / weighted by atomic number	2D
1673	0	0.002	RDF55e	Radial distribution function - 055 / weighted by relative Sanderson electronegativities	3D
259	0	0.002	MATS5c	Moran autocorrelation - lag 5 / weighted by charges	2D
849	0	0.004	SdO	Sum of atom-type E-State: =O	2D
643	0	0.002	Mv	Mean atomic van der Waals volumes (scaled on carbon atom)	2D
85	0	0.003	AATS1v	Average Broto-Moreau autocorrelation - lag 1 / weighted by van der Waals volumes	2D
468	0	0.003	nBondsS2	Total number of single bonds (including bonds to hydrogens, excluding aromatic bonds)	2D
1155	0	0.001	ETA_dAlpha_B	A measure of count of hydrogen bond acceptor atoms and/or polar surface area	2D
788	0	0.003	SHBint4	Sum of E-State descriptors of strength for potential hydrogen bonds of path length 4	2D
1478	0	0.002	TDB5e	3D topological distance based autocorrelation - lag 5 / weighted by Sanderson electronegativities	3D
560	0	0.003	SpMax5_Bhs	Largest absolute eigenvalue of Burden modified matrix - n 5 / weighted by relative I-state	2D
388	0	0.002	VE2_Dzm	Average coefficient sum of the last eigenvector from Barysz matrix / weighted by mass	2D
1819	0	0.003	Av	A total size index / weighted by relative van der Waals volumes	3D
221	0	0.002	AATSC2e	Average centered Broto-Moreau autocorrelation - lag 2 / weighted by Sanderson electronegativities	2D
123	0	0.002	AATS3s	Average Broto-Moreau autocorrelation - lag 3 / weighted by I-state	2D
1521	0	0.004	TDB8r	3D topological distance based autocorrelation - lag 8 / weighted by covalent radius	3D
1228	0	0.001	BIC0	Bond information content index (neighborhood symmetry of 0-order)	2D
1230	0	0.002	BIC2	Bond information content index (neighborhood symmetry of 2-order)	2D
602	0	0.003	VPC-4	Valence path cluster, order 4	2D
1258	0	0.002	MDEC-22	Molecular distance edge between all secondary carbons	2D
347	0	0.002	GATS5p	Geary autocorrelation - lag 5 / weighted by polarizabilities	2D
67	0	0.004	ATS1s	Broto-Moreau autocorrelation - lag 1 / weighted by I-state	2D
1838	0	0.003	L3p	3rd component size directional WHIM index / weighted by relative polarizabilities	3D
539	0	0.002	SpMin8_Bhp	Smallest absolute eigenvalue of Burden modified matrix - n 8 / weighted by relative polarizabilities	2D
1664	0	0.003	RDF10e	Radial distribution function - 010 / weighted by relative Sanderson electronegativities	3D
574	0	0.003	C1SP2	Doubly bound carbon bound to one other carbon	2D
1623	0	0.003	RDF105m	Radial distribution function - 105 / weighted by relative mass	3D
547	0	0.003	SpMax8_Bhi	Largest absolute eigenvalue of Burden modified matrix - n 8 / weighted by relative first ionization potential	2D
1866	0	0.001	P2s	2nd component shape directional WHIM index / weighted by relative I-state	3D
1163	0	0.002	ETA_dEpsilon_C	A measure of contribution of electronegativity	2D
1607	0	0.003	RDF25m	Radial distribution function - 025 / weighted by relative mass	3D
789	0	0.002	SHBint5	Sum of E-State descriptors of strength for potential hydrogen bonds of path length 5	2D
183	0	0.003	ATSC0s	Centered Broto-Moreau autocorrelation - lag 0 / weighted by I-state	2D
1147	0	0.003	MAXDP	Maximum positive intrinsic state di�fference in the molecule (related to the electrophilicity of the molecule). Using deltaV = (Zv-maxBondedHydrogens) /(atomicNumber-Zv-1). Gramatica, P., Corradi, M., and Consonni, V. (2000). Modelling and prediction of soil sorption coefficients of non-ionic organic pesticides by molecular descriptors. Chemosphere 41, 763-777.	2D
333	0	0.002	GATS7v	Geary autocorrelation - lag 7 / weighted by van der Waals volumes	2D
1206	0	0.002	IC2	Information content index (neighborhood symmetry of 2-order)	2D
300	0	0.002	MATS6i	Moran autocorrelation - lag 6 / weighted by first ionization potential	2D
622	0	0.003	VP-1	Valence path, order 1	2D
1023	0	0.002	maxwHBa	Maximum E-States for weak Hydrogen Bond acceptors	2D
1190	0	0.002	ETA_EtaP_F_L	Local functionality contribution EtaF_local relative to molecular size	2D
1873	0	0.001	Ks	K global shape index / weighted by relative I-state	3D
1700	0	0.002	RDF40p	Radial distribution function - 040 / weighted by relative polarizabilities	3D
502	0	0.002	SpMin3_Bhv	Smallest absolute eigenvalue of Burden modified matrix - n 3 / weighted by relative van der Waals volumes	2D
356	0	0.002	GATS6i	Geary autocorrelation - lag 6 / weighted by first ionization potential	2D
1252	0	0.002	MLogP	Mannhold LogP	2D
1354	0	0.002	nF9HeteroRing	Number of 9-membered fused rings containing heteroatoms (N, O, P, S, or halogens)	2D
1240	0	0.003	ZMIC0	Z-modified information content index (neighborhood symmetry of 0-order)	2D
1808	0	0.001	Km	K global shape index / weighted by relative mass	3D
182	0	0.003	ATSC8i	Centered Broto-Moreau autocorrelation - lag 8 / weighted by first ionization potential	2D
1500	0	0.002	TDB7i	3D topological distance based autocorrelation - lag 7 / weighted by first ionization potential	3D
93	0	0.002	AATS0e	Average Broto-Moreau autocorrelation - lag 0 / weighted by Sanderson electronegativities	2D
326	0	0.002	GATS8m	Geary autocorrelation - lag 8 / weighted by mass	2D
1637	0	0.003	RDF25v	Radial distribution function - 025 / weighted by relative van der Waals volumes	3D
1582	0	0.003	RDF50u	Radial distribution function - 050 / unweighted	3D
1562	0	0.003	LOBMAX	The maximum L/B ratio	3D
49	0	0.003	ATS1p	Broto-Moreau autocorrelation - lag 1 / weighted by polarizabilities	2D
1158	0	0.004	ETA_Epsilon_3	A measure of electronegative atom count	2D
1331	0	0.003	nT9Ring	Number of 9-membered rings (includes counts from fused rings)	2D
1486	0	0.002	TDB3p	3D topological distance based autocorrelation - lag 3 / weighted by polarizabilities	3D
272	0	0.003	MATS2v	Moran autocorrelation - lag 2 / weighted by van der Waals volumes	2D
597	0	0.002	VC-5	Valence cluster, order 5	2D
1480	0	0.003	TDB7e	3D topological distance based autocorrelation - lag 7 / weighted by Sanderson electronegativities	3D
1452	0	0.004	TDB9u	3D topological distance based autocorrelation - lag 9 / unweighted	3D
906	0	0.004	minHBint3	Minimum E-State descriptors of strength for potential Hydrogen Bonds of path length 3	2D
1170	0	0.002	ETA_Shape_X	Shape index X	2D
627	0	0.003	VP-6	Valence path, order 6	2D
1187	0	0.002	ETA_EtaP_L	Local index Eta_local relative to molecular size	2D
1731	0	0.002	RDF45i	Radial distribution function - 045 / weighted by relative first ionization potential	3D
691	0	0.003	nHCsatu	Count of atom-type H E-State: H�on C sp3 bonded to unsaturated C	2D
1554	0	0.002	GRAV-2	Square root of gravitational index of heavy atoms	3D
79	0	0.002	AATS4m	Average Broto-Moreau autocorrelation - lag 4 / weighted by mass	2D
501	0	0.002	SpMin2_Bhv	Smallest absolute eigenvalue of Burden modified matrix - n 2 / weighted by relative van der Waals volumes	2D
425	0	0.002	SM1_Dzp	Spectral moment of order 1 from Barysz matrix / weighted by polarizabilities	2D
309	0	0.002	MATS7s	Moran autocorrelation - lag 7 / weighted by I-state	2D
1785	0	0.002	L2u	2nd component size directional WHIM index / unweighted	3D
1725	0	0.002	RDF15i	Radial distribution function - 015 / weighted by relative first ionization potential	3D
1457	0	0.002	TDB4m	3D topological distance based autocorrelation - lag 4 / weighted by mass	3D
507	0	0.003	SpMin8_Bhv	Smallest absolute eigenvalue of Burden modified matrix - n 8 / weighted by relative van der Waals volumes	2D
443	0	0.002	VR2_Dzi	Normalized Randic-like eigenvector-based index from Barysz matrix / weighted by first ionization potential	2D
284	0	0.002	MATS6e	Moran autocorrelation - lag 6 / weighted by Sanderson electronegativities	2D
1589	0	0.002	RDF85u	Radial distribution function - 085 / unweighted	3D
60	0	0.002	ATS3i	Broto-Moreau autocorrelation - lag 3 / weighted by first ionization potential	2D
563	0	0.002	SpMax8_Bhs	Largest absolute eigenvalue of Burden modified matrix - n 8 / weighted by relative I-state	2D
1788	0	0.001	P2u	2nd component shape directional WHIM index / unweighted	3D
1811	0	0.002	L2v	2nd component size directional WHIM index / weighted by relative van der Waals volumes	3D
521	0	0.001	SpMin6_Bhe	Smallest absolute eigenvalue of Burden modified matrix - n 6 / weighted by relative Sanderson electronegativities	2D
833	0	0.002	SssssC	Sum of atom-type E-State: >C<	2D
254	0	0.002	AATSC8s	Average centered Broto-Moreau autocorrelation - lag 8 / weighted by I-state	2D
122	0	0.001	AATS2s	Average Broto-Moreau autocorrelation - lag 2 / weighted by I-state	2D
1522	0	0.003	TDB9r	3D topological distance based autocorrelation - lag 9 / weighted by covalent radius	3D
1579	0	0.002	RDF35u	Radial distribution function - 035 / unweighted	3D
50	0	0.003	ATS2p	Broto-Moreau autocorrelation - lag 2 / weighted by polarizabilities	2D
199	0	0.002	AATSC7c	Average centered Broto-Moreau autocorrelation - lag 7 / weighted by charges	2D
1565	0	0.002	MOMI-Y	Moment of inertia along Y axis	3D
1510	0	0.002	TDB7s	3D topological distance based autocorrelation - lag 7 / weighted by I-state	3D
582	0	0.004	SCH-4	Simple chain, order 4	2D
418	0	0.002	VR3_Dze	Logarithmic Randic-like eigenvector-based index from Barysz matrix / weighted by Sanderson electronegativities	2D
1844	0	0.002	Tp	T total size index / weighted by relative polarizabilities	3D
673	0	0.002	nHBint8	Count of E-State descriptors of strength for potential Hydrogen Bonds of path length 8	2D
1214	0	0.003	TIC4	Total information content index (neighborhood symmetry of 4-order)	2D
517	0	0.003	SpMin2_Bhe	Smallest absolute eigenvalue of Burden modified matrix - n 2 / weighted by relative Sanderson electronegativities	2D
340	0	0.002	GATS6e	Geary autocorrelation - lag 6 / weighted by Sanderson electronegativities	2D
146	0	0.002	ATSC8m	Centered Broto-Moreau autocorrelation - lag 8 / weighted by mass	2D
1410	0	0.001	TopoPSA	Topological polar surface area	2D
559	0	0.002	SpMax4_Bhs	Largest absolute eigenvalue of Burden modified matrix - n 4 / weighted by relative I-state	2D
1162	0	0.002	ETA_dEpsilon_B	A measure of contribution of unsaturation	2D
219	0	0.002	AATSC0e	Average centered Broto-Moreau autocorrelation - lag 0 / weighted by Sanderson electronegativities	2D
1257	0	0.003	MDEC-14	Molecular distance edge between all primary and quaternary carbons	2D
94	0	0.001	AATS1e	Average Broto-Moreau autocorrelation - lag 1 / weighted by Sanderson electronegativities	2D
81	0	0.002	AATS6m	Average Broto-Moreau autocorrelation - lag 6 / weighted by mass	2D
1200	0	0.003	nHBAcc_Lipinski	Number of hydrogen bond acceptors (using Lipinski's definition: any nitrogen; any oxygen)	2D
162	0	0.002	ATSC6e	Centered Broto-Moreau autocorrelation - lag 6 / weighted by Sanderson electronegativities	2D
411	0	0.003	EE_Dze	Estrada-like index from Barysz matrix / weighted by Sanderson electronegativities (ln(1+x))	2D
646	0	0.001	Mare	Mean atomic Allred-Rochow electronegativities (scaled on carbon atom)	2D
1159	0	0.001	ETA_Epsilon_4	A measure of electronegative atom count	2D
1862	0	0.003	L1s	1st component size directional WHIM index / weighted by relative I-state	3D
1161	0	0.002	ETA_dEpsilon_A	A measure of contribution of unsaturation and electronegative atom count	2D
1504	0	0.001	TDB1s	3D topological distance based autocorrelation - lag 1 / weighted by I-state	3D
1863	0	0.001	L2s	2nd component size directional WHIM index / weighted by relative I-state	3D
505	0	0.002	SpMin6_Bhv	Smallest absolute eigenvalue of Burden modified matrix - n 6 / weighted by relative van der Waals volumes	2D
292	0	0.002	MATS6p	Moran autocorrelation - lag 6 / weighted by polarizabilities	2D
1520	0	0.002	TDB7r	3D topological distance based autocorrelation - lag 7 / weighted by covalent radius	3D
1151	0	0.002	DELS2	Sum of all atoms intrinsic state differences (measure of total charge transfer in the molecule). Using deltaV = Zv-maxBondedHydrogens. Gramatica, P., Corradi, M., and Consonni, V. (2000). Modelling and prediction of soil sorption coefficients of non-ionic organic pesticides by molecular descriptors. Chemosphere 41, 763-777.	2D
1022	0	0.002	maxHBa	Maximum E-States for (strong) Hydrogen Bond acceptors	2D
823	0	0.002	SssCH2	Sum of atom-type E-State: -CH2-	2D
1048	0	0.001	maxHCsatu	Maximum atom-type H E-State: H�on C sp3 bonded to unsaturated C	2D
1710	0	0.003	RDF90p	Radial distribution function - 090 / weighted by relative polarizabilities	3D
247	0	0.001	AATSC1s	Average centered Broto-Moreau autocorrelation - lag 1 / weighted by I-state	2D
412	0	0.002	SM1_Dze	Spectral moment of order 1 from Barysz matrix / weighted by Sanderson electronegativities	2D
286	0	0.002	MATS8e	Moran autocorrelation - lag 8 / weighted by Sanderson electronegativities	2D
1029	0	0.002	maxHBint7	Maximum E-State descriptors of strength for potential Hydrogen Bonds of path length 7	2D
562	0	0.002	SpMax7_Bhs	Largest absolute eigenvalue of Burden modified matrix - n 7 / weighted by relative I-state	2D
1800	0	0.001	P1m	1st component shape directional WHIM index / weighted by relative mass	3D
1581	0	0.002	RDF45u	Radial distribution function - 045 / unweighted	3D
1037	0	0.002	maxHssNH	Maximum atom-type H E-State: -NH-	2D
690	0	0.002	nHCsats	Count of atom-type H E-State: H�bonded to B, Si, P, Ge, As, Se, Sn or Pb	2D
531	0	0.002	SpMax8_Bhp	Largest absolute eigenvalue of Burden modified matrix - n 8 / weighted by relative polarizabilities	2D
644	0	0.001	Mse	Mean atomic Sanderson electronegativities (scaled on carbon atom)	2D
442	0	0.002	VR1_Dzi	Randic-like eigenvector-based index from Barysz matrix / weighted by first ionization potential	2D
457	0	0.002	VR3_Dzs	Logarithmic Randic-like eigenvector-based index from Barysz matrix / weighted by I-state	2D
208	0	0.002	AATSC7m	Average centered Broto-Moreau autocorrelation - lag 7 / weighted by mass	2D
1433	0	0.001	MW	Molecular weight	2D
1585	0	0.001	RDF65u	Radial distribution function - 065 / unweighted	3D
1339	0	0.003	n5HeteroRing	Number of 5-membered rings containing heteroatoms (N, O, P, S, or halogens)	2D
206	0	0.001	AATSC5m	Average centered Broto-Moreau autocorrelation - lag 5 / weighted by mass	2D
1701	0	0.002	RDF45p	Radial distribution function - 045 / weighted by relative polarizabilities	3D
277	0	0.001	MATS7v	Moran autocorrelation - lag 7 / weighted by van der Waals volumes	2D
908	0	0.002	minHBint5	Minimum E-State descriptors of strength for potential Hydrogen Bonds of path length 5	2D
165	0	0.001	ATSC0p	Centered Broto-Moreau autocorrelation - lag 0 / weighted by polarizabilities	2D
435	0	0.002	SpAD_Dzi	Spectral absolute deviation from Barysz matrix / weighted by first ionization potential	2D
929	0	0.002	minHCsatu	Minimum atom-type H E-State: H�on C sp3 bonded to unsaturated C	2D
1792	0	0.002	Tu	T total size index / unweighted	3D
961	0	0.002	mindsN	Minimum atom-type E-State: =N-	2D
1503	0	0.002	TDB10i	3D topological distance based autocorrelation - lag 10 / weighted by first ionization potential	3D
1836	0	0.001	L1p	1st component size directional WHIM index / weighted by relative polarizabilities	3D
1850	0	0.001	L2i	2nd component size directional WHIM index / weighted by relative first ionization potential	3D
1088	0	0.003	maxssO	Maximum atom-type E-State: -O-	2D
1821	0	0.001	Kv	K global shape index / weighted by relative van der Waals volumes	3D
492	0	0.002	SpMax1_Bhv	Largest absolute eigenvalue of Burden modified matrix - n 1 / weighted by relative van der Waals volumes	2D
511	0	0.002	SpMax4_Bhe	Largest absolute eigenvalue of Burden modified matrix - n 4 / weighted by relative Sanderson electronegativities	2D
1327	0	0.002	nT5Ring	Number of 5-membered rings (includes counts from fused rings)	2D
731	0	0.001	nssO	Count of atom-type E-State: -O-	2D
645	0	0.002	Mpe	Mean atomic Pauling electronegativities (scaled on carbon atom)	2D
69	0	0.002	ATS3s	Broto-Moreau autocorrelation - lag 3 / weighted by I-state	2D
963	0	0.002	minsssN	Minimum atom-type E-State: >N-	2D
399	0	0.001	SM1_Dzv	Spectral moment of order 1 from Barysz matrix / weighted by van der Waals volumes	2D
1552	0	0.001	RPSA	TPSA / total molecular surface area	3D
1239	0	0.002	MIC5	Modified information content index (neighborhood symmetry of 5-order)	2D
1172	0	0.001	ETA_BetaP	A measure of electronic features of the molecule relative to molecular size	2D
1511	0	0.003	TDB8s	3D topological distance based autocorrelation - lag 8 / weighted by I-state	3D
403	0	0.001	VR1_Dzv	Randic-like eigenvector-based index from Barysz matrix / weighted by van der Waals volumes	2D
121	0	0.001	AATS1s	Average Broto-Moreau autocorrelation - lag 1 / weighted by I-state	2D
544	0	0.002	SpMax5_Bhi	Largest absolute eigenvalue of Burden modified matrix - n 5 / weighted by relative first ionization potential	2D
810	0	0.001	SHCsatu	Sum of atom-type H E-State: H�on C sp3 bonded to unsaturated C	2D
1703	0	0.002	RDF55p	Radial distribution function - 055 / weighted by relative polarizabilities	3D
729	0	0.002	nsOH	Count of atom-type E-State: -OH	2D
1528	0	0.001	PNSA-2	Partial negative surface area * total negative charge on the molecule	3D
390	0	0.001	VR1_Dzm	Randic-like eigenvector-based index from Barysz matrix / weighted by mass	2D
1574	0	0.002	RDF10u	Radial distribution function - 010 / unweighted	3D
1507	0	0.002	TDB4s	3D topological distance based autocorrelation - lag 4 / weighted by I-state	3D
1559	0	0.001	GRAV-4	Gravitational index of all pairs of atoms (not just bonded pairs)	3D
147	0	0.002	ATSC0v	Centered Broto-Moreau autocorrelation - lag 0 / weighted by van der Waals volumes	2D
22	0	0.001	ATS1m	Broto-Moreau autocorrelation - lag 1 / weighted by mass	2D
174	0	0.002	ATSC0i	Centered Broto-Moreau autocorrelation - lag 0 / weighted by first ionization potential	2D
1473	0	0.001	TDB10v	3D topological distance based autocorrelation - lag 10 / weighted by van der Waals volumes	3D
377	0	0.001	VR1_DzZ	Randic-like eigenvector-based index from Barysz matrix / weighted by atomic number	2D
1665	0	0.001	RDF15e	Radial distribution function - 015 / weighted by relative Sanderson electronegativities	3D
1818	0	0.002	Tv	T total size index / weighted by relative van der Waals volumes	3D
275	0	0.001	MATS5v	Moran autocorrelation - lag 5 / weighted by van der Waals volumes	2D
1812	0	0.002	L3v	3rd component size directional WHIM index / weighted by relative van der Waals volumes	3D
3	0	0.001	AMR	Molar refractivity	2D
1825	0	0.001	L3e	3rd component size directional WHIM index / weighted by relative Sanderson electronegativities	3D
1533	0	0.002	FPSA-1	PPSA-1 / total molecular surface area	3D
496	0	0.001	SpMax5_Bhv	Largest absolute eigenvalue of Burden modified matrix - n 5 / weighted by relative van der Waals volumes	2D
561	0	0.001	SpMax6_Bhs	Largest absolute eigenvalue of Burden modified matrix - n 6 / weighted by relative I-state	2D
1280	0	0.001	MPC3	Molecular path count of order 3	2D
1362	0	0.003	nT6HeteroRing	Number of 6-membered rings (includes counts from fused rings) containing heteroatoms (N, O, P, S, or halogens)	2D
301	0	0.002	MATS7i	Moran autocorrelation - lag 7 / weighted by first ionization potential	2D
273	0	0.001	MATS3v	Moran autocorrelation - lag 3 / weighted by van der Waals volumes	2D
1670	0	0.001	RDF40e	Radial distribution function - 040 / weighted by relative Sanderson electronegativities	3D
1471	0	0.002	TDB8v	3D topological distance based autocorrelation - lag 8 / weighted by van der Waals volumes	3D
191	0	0.001	ATSC8s	Centered Broto-Moreau autocorrelation - lag 8 / weighted by I-state	2D
78	0	0.001	AATS3m	Average Broto-Moreau autocorrelation - lag 3 / weighted by mass	2D
1024	0	0.002	maxHBint2	Maximum E-State descriptors of strength for potential Hydrogen Bonds of path length 2	2D
1669	0	0.001	RDF35e	Radial distribution function - 035 / weighted by relative Sanderson electronegativities	3D
1578	0	0.001	RDF30u	Radial distribution function - 030 / unweighted	3D
1336	0	0.002	nHeteroRing	Number of rings containing heteroatoms (N, O, P, S, or halogens)	2D
1680	0	0.002	RDF90e	Radial distribution function - 090 / weighted by relative Sanderson electronegativities	3D
1436	0	0.001	WTPT-2	Molecular ID / number of atoms	2D
25	0	0.001	ATS4m	Broto-Moreau autocorrelation - lag 4 / weighted by mass	2D
43	0	0.001	ATS4e	Broto-Moreau autocorrelation - lag 4 / weighted by Sanderson electronegativities	2D
1380	0	0.001	GGI3	Topological charge index of order 3	2D
1640	0	0.001	RDF40v	Radial distribution function - 040 / weighted by relative van der Waals volumes	3D
1591	0	0.001	RDF95u	Radial distribution function - 095 / unweighted	3D
405	0	0.002	VR3_Dzv	Logarithmic Randic-like eigenvector-based index from Barysz matrix / weighted by van der Waals volumes	2D
1477	0	0.001	TDB4e	3D topological distance based autocorrelation - lag 4 / weighted by Sanderson electronegativities	3D
1414	0	0.001	MWC3	Molecular walk count of order 3 (ln(1+x)	2D
1166	0	0.001	ETA_dPsi_A	A measure of hydrogen bonding propensity of the molecules	2D
604	0	0.001	VPC-6	Valence path cluster, order 6	2D
498	0	0.002	SpMax7_Bhv	Largest absolute eigenvalue of Burden modified matrix - n 7 / weighted by relative van der Waals volumes	2D
526	0	0.001	SpMax3_Bhp	Largest absolute eigenvalue of Burden modified matrix - n 3 / weighted by relative polarizabilities	2D
1705	0	0.001	RDF65p	Radial distribution function - 065 / weighted by relative polarizabilities	3D
624	0	0.002	VP-3	Valence path, order 3	2D
1586	0	0.001	RDF70u	Radial distribution function - 070 / unweighted	3D
1305	0	0.001	n5Ring	Number of 5-membered rings	2D
470	0	0.002	nBondsD	Number of double bonds	2D
594	0	0.001	SC-6	Simple cluster, order 6	2D
1483	0	0.002	TDB10e	3D topological distance based autocorrelation - lag 10 / weighted by Sanderson electronegativities	3D
537	0	0.001	SpMin6_Bhp	Smallest absolute eigenvalue of Burden modified matrix - n 6 / weighted by relative polarizabilities	2D
952	0	0.001	minssssC	Minimum atom-type E-State: >C<	2D
48	0	0.002	ATS0p	Broto-Moreau autocorrelation - lag 0 / weighted by polarizabilities	2D
787	0	0.001	SHBint3	Sum of E-State descriptors of strength for potential hydrogen bonds of path length 3	2D
63	0	0.002	ATS6i	Broto-Moreau autocorrelation - lag 6 / weighted by first ionization potential	2D
1186	0	0.001	ETA_Eta_L	Local index Eta_local	2D
1572	0	0.001	geomDiameter	Geometrical diameter (maximum geometric eccentricity)	3D
1469	0	0.001	TDB6v	3D topological distance based autocorrelation - lag 6 / weighted by van der Waals volumes	3D
1148	0	0.001	DELS	Sum of all atoms intrinsic state differences (measure of total charge transfer in the molecule). Using deltaV = (Zv-maxBondedHydrogens) /(atomicNumber-Zv-1). Gramatica, P., Corradi, M., and Consonni, V. (2000). Modelling and prediction of soil sorption coefficients of non-ionic organic pesticides by molecular descriptors. Chemosphere 41, 763-777.	2D
1518	0	0.001	TDB5r	3D topological distance based autocorrelation - lag 5 / weighted by covalent radius	3D
1797	0	0.001	L1m	1st component size directional WHIM index / weighted by relative mass	3D
1491	0	0.001	TDB8p	3D topological distance based autocorrelation - lag 8 / weighted by polarizabilities	3D
609	0	0.001	SP-4	Simple path, order 4	2D
1839	0	0.001	P1p	1st component shape directional WHIM index / weighted by relative polarizabilities	3D
954	0	0.002	minsNH2	Minimum atom-type E-State: -NH2	2D
1619	0	0.001	RDF85m	Radial distribution function - 085 / weighted by relative mass	3D
1667	0	0.002	RDF25e	Radial distribution function - 025 / weighted by relative Sanderson electronegativities	3D
30	0	0.001	ATS0v	Broto-Moreau autocorrelation - lag 0 / weighted by van der Waals volumes	2D
104	0	0.001	AATS2p	Average Broto-Moreau autocorrelation - lag 2 / weighted by polarizabilities	2D
391	0	0.001	VR2_Dzm	Normalized Randic-like eigenvector-based index from Barysz matrix / weighted by mass	2D
1807	0	0.002	Vm	V total size index / weighted by relative mass	3D
190	0	0.001	ATSC7s	Centered Broto-Moreau autocorrelation - lag 7 / weighted by I-state	2D
917	0	0.001	minHsNH2	Minimum atom-type H E-State: -NH2	2D
396	0	0.002	SpAD_Dzv	Spectral absolute deviation from Barysz matrix / weighted by van der Waals volumes	2D
382	0	0.002	SpDiam_Dzm	Spectral diameter from Barysz matrix / weighted by mass	2D
1416	0	0.001	MWC5	Molecular walk count of order 5 (ln(1+x)	2D
605	0	0.001	SP-0	Simple path, order 0	2D
1418	0	0.001	MWC7	Molecular walk count of order 7 (ln(1+x)	2D
1211	0	0.001	TIC1	Total information content index (neighborhood symmetry of 1-order)	2D
209	0	0.001	AATSC8m	Average centered Broto-Moreau autocorrelation - lag 8 / weighted by mass	2D
164	0	0.001	ATSC8e	Centered Broto-Moreau autocorrelation - lag 8 / weighted by Sanderson electronegativities	2D
1577	0	0.001	RDF25u	Radial distribution function - 025 / unweighted	3D
1553	0	0.001	GRAV-1	Gravitational index of heavy atoms	3D
1401	0	0.001	SpAD_D	Spectral absolute deviation from topological distance matrix	2D
638	0	0.001	Sse	Sum of atomic Sanderson electronegativities (scaled on carbon atom)	2D
1704	0	0.001	RDF60p	Radial distribution function - 060 / weighted by relative polarizabilities	3D
107	0	0.001	AATS5p	Average Broto-Moreau autocorrelation - lag 5 / weighted by polarizabilities	2D
1747	0	0.001	RDF125i	Radial distribution function - 125 / weighted by relative first ionization potential	3D
1297	0	0.002	piPC9	Conventional bond order ID number of order 9 (ln(1+x)	2D
37	0	0.001	ATS7v	Broto-Moreau autocorrelation - lag 7 / weighted by van der Waals volumes	2D
529	0	0.001	SpMax6_Bhp	Largest absolute eigenvalue of Burden modified matrix - n 6 / weighted by relative polarizabilities	2D
1031	0	0.002	maxHBint9	Maximum E-State descriptors of strength for potential Hydrogen Bonds of path length 9	2D
960	0	0.002	minsssNHp	Minimum atom-type E-State: >NH-+	2D
515	0	0.001	SpMax8_Bhe	Largest absolute eigenvalue of Burden modified matrix - n 8 / weighted by relative Sanderson electronegativities	2D
637	0	0.001	Sv	Sum of atomic van der Waals volumes (scaled on carbon atom)	2D
663	0	0.001	nHBd	Count of E-States for (strong) Hydrogen Bond donors	2D
992	0	0.001	minsCl	Minimum atom-type E-State: -Cl	2D
420	0	0.001	SpMax_Dzp	Leading eigenvalue from Barysz matrix / weighted by polarizabilities	2D
708	0	0.001	nsssCH	Count of atom-type E-State: >CH-	2D
1212	0	0.001	TIC2	Total information content index (neighborhood symmetry of 2-order)	2D
1456	0	0	TDB3m	3D topological distance based autocorrelation - lag 3 / weighted by mass	3D
1853	0	0.001	P2i	2nd component shape directional WHIM index / weighted by relative first ionization potential	3D
603	0	0.001	VPC-5	Valence path cluster, order 5	2D
13	0	0.001	nO	Number of oxygen atoms	2D
1222	0	0.001	CIC0	Complementary information content index (neighborhood symmetry of 0-order)	2D
357	0	0.001	GATS7i	Geary autocorrelation - lag 7 / weighted by first ionization potential	2D
1706	0	0.001	RDF70p	Radial distribution function - 070 / weighted by relative polarizabilities	3D
1826	0	0.001	P1e	1st component shape directional WHIM index / weighted by relative Sanderson electronegativities	3D
1820	0	0.001	Vv	V total size index / weighted by relative van der Waals volumes	3D
670	0	0.001	nHBint5	Count of E-State descriptors of strength for potential Hydrogen Bonds of path length 5	2D
57	0	0.001	ATS0i	Broto-Moreau autocorrelation - lag 0 / weighted by first ionization potential	2D
1292	0	0.001	piPC4	Conventional bond order ID number of order 4 (ln(1+x)	2D
546	0	0.001	SpMax7_Bhi	Largest absolute eigenvalue of Burden modified matrix - n 7 / weighted by relative first ionization potential	2D
830	0	0.001	SdssC	Sum of atom-type E-State: =C<	2D
392	0	0.001	VR3_Dzm	Logarithmic Randic-like eigenvector-based index from Barysz matrix / weighted by mass	2D
1397	0	0.001	JGI10	Mean topological charge index of order 10	2D
514	0	0.001	SpMax7_Bhe	Largest absolute eigenvalue of Burden modified matrix - n 7 / weighted by relative Sanderson electronegativities	2D
419	0	0.001	SpAbs_Dzp	Graph energy from Barysz matrix / weighted by polarizabilities	2D
927	0	0.001	minHCHnX	Minimum atom-type H E-State: CHnX	2D
1734	0	0.001	RDF60i	Radial distribution function - 060 / weighted by relative first ionization potential	3D
1415	0	0.001	MWC4	Molecular walk count of order 4 (ln(1+x)	2D
1087	0	0.001	maxdO	Maximum atom-type E-State: =O	2D
946	0	0.001	minsssCH	Minimum atom-type E-State: >CH-	2D
1026	0	0.001	maxHBint4	Maximum E-State descriptors of strength for potential Hydrogen Bonds of path length 4	2D
1784	0	0.001	L1u	1st component size directional WHIM index / unweighted	3D
1425	0	0.001	SRW4	Self-returning walk count of order 4 (ln(1+x)	2D
666	0	0.001	nwHBa	Count of E-States for weak Hydrogen Bond acceptors	2D
1299	0	0.001	TpiPC	Total conventional bond order (up to order 10) (ln(1+x))	2D
62	0	0.001	ATS5i	Broto-Moreau autocorrelation - lag 5 / weighted by first ionization potential	2D
1403	0	0.001	EE_D	Estrada-like index from topological distance matrix	2D
1646	0	0.001	RDF70v	Radial distribution function - 070 / weighted by relative van der Waals volumes	3D
1282	0	0.001	MPC5	Molecular path count of order 5	2D
704	0	0.001	nssCH2	Count of atom-type E-State: -CH2-	2D
366	0	0.001	GATS8s	Geary autocorrelation - lag 8 / weighted by I-state	2D
1674	0	0.001	RDF60e	Radial distribution function - 060 / weighted by relative Sanderson electronegativities	3D
610	0	0.001	SP-5	Simple path, order 5	2D
671	0	0.001	nHBint6	Count of E-State descriptors of strength for potential Hydrogen Bonds of path length 6	2D
1201	0	0.001	nHBDon	Number of hydrogen bond donors (using CDK HBondDonorCountDescriptor algorithm)	2D
1620	0	0.001	RDF90m	Radial distribution function - 090 / weighted by relative mass	3D
35	0	0.001	ATS5v	Broto-Moreau autocorrelation - lag 5 / weighted by van der Waals volumes	2D
1440	0	0.001	WPATH	Weiner path number	2D
410	0	0.001	SpMAD_Dze	Spectral mean absolute deviation from Barysz matrix / weighted by Sanderson electronegativities	2D
31	0	0.001	ATS1v	Broto-Moreau autocorrelation - lag 1 / weighted by van der Waals volumes	2D
495	0	0.001	SpMax4_Bhv	Largest absolute eigenvalue of Burden modified matrix - n 4 / weighted by relative van der Waals volumes	2D
253	0	0.001	AATSC7s	Average centered Broto-Moreau autocorrelation - lag 7 / weighted by I-state	2D
1197	0	0.001	nHBAcc	Number of hydrogen bond acceptors (using CDK HBondAcceptorCountDescriptor algorithm)	2D
1845	0	0.001	Ap	A total size index / weighted by relative polarizabilities	3D
723	0	0.001	ndsN	Count of atom-type E-State: =N-	2D
1210	0	0.001	TIC0	Total information content index (neighborhood symmetry of 0-order)	2D
397	0	0.001	SpMAD_Dzv	Spectral mean absolute deviation from Barysz matrix / weighted by van der Waals volumes	2D
53	0	0.001	ATS5p	Broto-Moreau autocorrelation - lag 5 / weighted by polarizabilities	2D
1712	0	0.001	RDF100p	Radial distribution function - 100 / weighted by relative polarizabilities	3D
542	0	0.001	SpMax3_Bhi	Largest absolute eigenvalue of Burden modified matrix - n 3 / weighted by relative first ionization potential	2D
528	0	0.001	SpMax5_Bhp	Largest absolute eigenvalue of Burden modified matrix - n 5 / weighted by relative polarizabilities	2D
1851	0	0	L3i	3rd component size directional WHIM index / weighted by relative first ionization potential	3D
1781	0	0.001	RDF145s	Radial distribution function - 145 / weighted by relative I-state	3D
55	0	0.001	ATS7p	Broto-Moreau autocorrelation - lag 7 / weighted by polarizabilities	2D
1864	0	0.001	L3s	3rd component size directional WHIM index / weighted by relative I-state	3D
40	0	0.001	ATS1e	Broto-Moreau autocorrelation - lag 1 / weighted by Sanderson electronegativities	2D
798	0	0.001	SHsNH2	Sum of atom-type H E-State: -NH2	2D
261	0	0.001	MATS7c	Moran autocorrelation - lag 7 / weighted by charges	2D
1435	0	0.001	WTPT-1	Molecular ID	2D
1455	0	0.001	TDB2m	3D topological distance based autocorrelation - lag 2 / weighted by mass	3D
535	0	0.001	SpMin4_Bhp	Smallest absolute eigenvalue of Burden modified matrix - n 4 / weighted by relative polarizabilities	2D
1872	0	0.001	Vs	V total size index / weighted by relative I-state	3D
409	0	0.001	SpAD_Dze	Spectral absolute deviation from Barysz matrix / weighted by Sanderson electronegativities	2D
1370	0	0.001	nRotB	Number of rotatable bonds, excluding terminal bonds	2D
1737	0	0.001	RDF75i	Radial distribution function - 075 / weighted by relative first ionization potential	3D
497	0	0.001	SpMax6_Bhv	Largest absolute eigenvalue of Burden modified matrix - n 6 / weighted by relative van der Waals volumes	2D
494	0	0.001	SpMax3_Bhv	Largest absolute eigenvalue of Burden modified matrix - n 3 / weighted by relative van der Waals volumes	2D
1805	0	0.001	Tm	T total size index / weighted by relative mass	3D
11	0	0.001	nC	Number of carbon atoms	2D
434	0	0.001	SpDiam_Dzi	Spectral diameter from Barysz matrix / weighted by first ionization potential	2D
34	0	0	ATS4v	Broto-Moreau autocorrelation - lag 4 / weighted by van der Waals volumes	2D
108	0	0.001	AATS6p	Average Broto-Moreau autocorrelation - lag 6 / weighted by polarizabilities	2D
1453	0	0.001	TDB10u	3D topological distance based autocorrelation - lag 10 / unweighted	3D
702	0	0.001	nsCH3	Count of atom-type E-State: -CH3	2D
601	0	0.001	SPC-6	Simple path cluster, order 6	2D
1558	0	0	GRAVH-3	Cube root of hydrogen-included gravitational index	3D
1858	0	0	Ai	A total size index / weighted by relative first ionization potential	3D
42	0	0.001	ATS3e	Broto-Moreau autocorrelation - lag 3 / weighted by Sanderson electronegativities	2D
1303	0	0.001	n3Ring	Number of 3-membered rings	2D
1413	0	0	MWC2	Molecular walk count of order 2 (ln(1+x)	2D
1824	0	0	L2e	2nd component size directional WHIM index / weighted by relative Sanderson electronegativities	3D
623	0	0.001	VP-2	Valence path, order 2	2D
1675	0	0.001	RDF65e	Radial distribution function - 065 / weighted by relative Sanderson electronegativities	3D
1709	0	0.001	RDF85p	Radial distribution function - 085 / weighted by relative polarizabilities	3D
676	0	0.001	nHsOH	Count of atom-type H E-State: -OH	2D
381	0	0.001	SpMax_Dzm	Leading eigenvalue from Barysz matrix / weighted by mass	2D
1771	0	0.001	RDF95s	Radial distribution function - 095 / weighted by relative I-state	3D
1399	0	0.001	SpMax_D	Leading eigenvalue from topological distance matrix	2D
1564	0	0.001	MOMI-X	Moment of inertia along X axis	3D
102	0	0	AATS0p	Average Broto-Moreau autocorrelation - lag 0 / weighted by polarizabilities	2D
1238	0	0.001	MIC4	Modified information content index (neighborhood symmetry of 4-order)	2D
628	0	0.001	VP-7	Valence path, order 7	2D
383	0	0	SpAD_Dzm	Spectral absolute deviation from Barysz matrix / weighted by mass	2D
957	0	0.001	minssNH	Minimum atom-type E-State: -NH-	2D
128	0	0.001	AATS8s	Average Broto-Moreau autocorrelation - lag 8 / weighted by I-state	2D
68	0	0	ATS2s	Broto-Moreau autocorrelation - lag 2 / weighted by I-state	2D
368	0	0	SpMax_DzZ	Leading eigenvalue from Barysz matrix / weighted by atomic number	2D
1470	0	0.001	TDB7v	3D topological distance based autocorrelation - lag 7 / weighted by van der Waals volumes	3D
1580	0	0	RDF40u	Radial distribution function - 040 / unweighted	3D
1183	0	0.001	ETA_Eta_R	Composite index Eta for reference alkane	2D
1150	0	0.001	MAXDP2	Maximum positive intrinsic state di�fference in the molecule (related to the electrophilicity of the molecule). Using deltaV = Zv-maxBondedHydrogens. Gramatica, P., Corradi, M., and Consonni, V. (2000). Modelling and prediction of soil sorption coefficients of non-ionic organic pesticides by molecular descriptors. Chemosphere 41, 763-777.	2D
583	0	0.001	SCH-5	Simple chain, order 5	2D
1417	0	0	MWC6	Molecular walk count of order 6 (ln(1+x)	2D
1384	0	0	GGI7	Topological charge index of order 7	2D
907	0	0.001	minHBint4	Minimum E-State descriptors of strength for potential Hydrogen Bonds of path length 4	2D
379	0	0	VR3_DzZ	Logarithmic Randic-like eigenvector-based index from Barysz matrix / weighted by atomic number	2D
1672	0	0	RDF50e	Radial distribution function - 050 / weighted by relative Sanderson electronegativities	3D
667	0	0.001	nHBint2	Count of E-State descriptors of strength for potential Hydrogen Bonds of path length 2	2D
1782	0	0.001	RDF150s	Radial distribution function - 150 / weighted by relative I-state	3D
1251	0	0	nAtomLAC	Number of atoms in the longest aliphatic chain	2D
1082	0	0.001	maxsssN	Maximum atom-type E-State: >N-	2D
1597	0	0.001	RDF125u	Radial distribution function - 125 / unweighted	3D
721	0	0.001	ntN	Count of atom-type E-State: #N	2D
1732	0	0	RDF50i	Radial distribution function - 050 / weighted by relative first ionization potential	3D
706	0	0.001	ndsCH	Count of atom-type E-State: =CH-	2D
380	0	0	SpAbs_Dzm	Graph energy from Barysz matrix / weighted by mass	2D
714	0	0.001	nssssC	Count of atom-type E-State: >C<	2D
20	0	0.001	nX	Number of halogen atoms (F, Cl, Br, I, At, Uus)	2D
1622	0	0.001	RDF100m	Radial distribution function - 100 / weighted by relative mass	3D
1411	0	0.001	VABC	Van der Waals volume calculated using the method proposed in [Zhao, Yuan H. and Abraham, Michael H. and Zissimos, Andreas M., Fast Calculation of van der Waals Volume as a Sum of Atomic and Bond Contributions and Its Application to Drug Compounds, The Journal of Organic Chemistry, 2003, 68:7368-7373]	2D
1871	0	0.001	As	A total size index / weighted by relative I-state	3D
52	0	0	ATS4p	Broto-Moreau autocorrelation - lag 4 / weighted by polarizabilities	2D
827	0	0.001	SsssCH	Sum of atom-type E-State: >CH-	2D
51	0	0.001	ATS3p	Broto-Moreau autocorrelation - lag 3 / weighted by polarizabilities	2D
408	0	0	SpDiam_Dze	Spectral diameter from Barysz matrix / weighted by Sanderson electronegativities	2D
369	0	0.001	SpDiam_DzZ	Spectral diameter from Barysz matrix / weighted by atomic number	2D
754	0	0.001	nsCl	Count of atom-type E-State: -Cl	2D
1421	0	0	MWC10	Molecular walk count of order 10 (ln(1+x)	2D
693	0	0	nHother	Count of atom-type H E-State: H�on aaCH, dCH2 or dsCH	2D
1720	0	0.001	RDF140p	Radial distribution function - 140 / weighted by relative polarizabilities	3D
1295	0	0.001	piPC7	Conventional bond order ID number of order 7 (ln(1+x)	2D
1472	0	0	TDB9v	3D topological distance based autocorrelation - lag 9 / weighted by van der Waals volumes	3D
608	0	0	SP-3	Simple path, order 3	2D
1402	0	0	SpMAD_D	Spectral mean absolute deviation from topological distance matrix	2D
1487	0	0	TDB4p	3D topological distance based autocorrelation - lag 4 / weighted by polarizabilities	3D
799	0	0.001	SHssNH	Sum of atom-type H E-State: -NH-	2D
1740	0	0	RDF90i	Radial distribution function - 090 / weighted by relative first ionization potential	3D
662	0	0	ECCEN	A topological descriptor combining distance and adjacency information	2D
650	0	0	CrippenMR	Crippen's molar refractivity	2D
909	0	0.001	minHBint6	Minimum E-State descriptors of strength for potential Hydrogen Bonds of path length 6	2D
516	0	0	SpMin1_Bhe	Smallest absolute eigenvalue of Burden modified matrix - n 1 / weighted by relative Sanderson electronegativities	2D
384	0	0	SpMAD_Dzm	Spectral mean absolute deviation from Barysz matrix / weighted by mass	2D
1262	0	0.001	MDEC-34	Molecular distance edge between all tertiary and quaternary carbons	2D
1254	0	0.001	MDEC-11	Molecular distance edge between all primary carbons	2D
370	0	0.001	SpAD_DzZ	Spectral absolute deviation from Barysz matrix / weighted by atomic number	2D
406	0	0	SpAbs_Dze	Graph energy from Barysz matrix / weighted by Sanderson electronegativities	2D
902	0	0	minwHBd	Minimum E-States for weak Hydrogen Bond donors	2D
1831	0	0	Te	T total size index / weighted by relative Sanderson electronegativities	3D
395	0	0	SpDiam_Dzv	Spectral diameter from Barysz matrix / weighted by van der Waals volumes	2D
1649	0	0	RDF85v	Radial distribution function - 085 / weighted by relative van der Waals volumes	3D
41	0	0	ATS2e	Broto-Moreau autocorrelation - lag 2 / weighted by Sanderson electronegativities	2D
444	0	0	VR3_Dzi	Logarithmic Randic-like eigenvector-based index from Barysz matrix / weighted by first ionization potential	2D
1176	0	0	ETA_BetaP_ns	A measure of electron-richness of the molecule relative to molecular size	2D
1605	0	0	RDF15m	Radial distribution function - 015 / weighted by relative mass	3D
39	0	0	ATS0e	Broto-Moreau autocorrelation - lag 0 / weighted by Sanderson electronegativities	2D
77	0	0	AATS2m	Average Broto-Moreau autocorrelation - lag 2 / weighted by mass	2D
1633	0	0.001	RDF155m	Radial distribution function - 155 / weighted by relative mass	3D
1381	0	0.001	GGI4	Topological charge index of order 4	2D
1647	0	0.001	RDF75v	Radial distribution function - 075 / weighted by relative van der Waals volumes	3D
1707	0	0	RDF75p	Radial distribution function - 075 / weighted by relative polarizabilities	3D
1270	0	0	MDEN-22	Molecular distance edge between all secondary nitroqens	2D
835	0	0	SsNH2	Sum of atom-type E-State: -NH2	2D
481	0	0	SpMax6_Bhm	Largest absolute eigenvalue of Burden modified matrix - n 6 / weighted by relative mass	2D
711	0	0	ndssC	Count of atom-type E-State: =C<	2D
625	0	0	VP-4	Valence path, order 4	2D
1767	0	0	RDF75s	Radial distribution function - 075 / weighted by relative I-state	3D
1463	0	0	TDB10m	3D topological distance based autocorrelation - lag 10 / weighted by mass	3D
1025	0	0	maxHBint3	Maximum E-State descriptors of strength for potential Hydrogen Bonds of path length 3	2D
512	0	0	SpMax5_Bhe	Largest absolute eigenvalue of Burden modified matrix - n 5 / weighted by relative Sanderson electronegativities	2D
801	0	0.001	SHsNH3p	Sum of atom-type H E-State: -NH3+	2D
1794	0	0	Vu	V total size index / unweighted	3D
1650	0	0	RDF90v	Radial distribution function - 090 / weighted by relative van der Waals volumes	3D
600	0	0	SPC-5	Simple path cluster, order 5	2D
687	0	0	nHdsCH	Count of atom-type H E-State: =CH-	2D
716	0	0.001	nsNH2	Count of atom-type E-State: -NH2	2D
1651	0	0	RDF95v	Radial distribution function - 095 / weighted by relative van der Waals volumes	3D
29	0	0	ATS8m	Broto-Moreau autocorrelation - lag 8 / weighted by mass	2D
1281	0	0	MPC4	Molecular path count of order 4	2D
1702	0	0	RDF50p	Radial distribution function - 050 / weighted by relative polarizabilities	3D
1512	0	0	TDB9s	3D topological distance based autocorrelation - lag 9 / weighted by I-state	3D
1584	0	0	RDF60u	Radial distribution function - 060 / unweighted	3D
1046	0	0.001	maxHCHnX	Maximum atom-type H E-State: CHnX	2D
725	0	0	nsssN	Count of atom-type E-State: >N-	2D
639	0	0	Spe	Sum of atomic Pauling electronegativities (scaled on carbon atom)	2D
1431	0	0	SRW10	Self-returning walk count of order 10 (ln(1+x)	2D
612	0	0	SP-7	Simple path, order 7	2D
349	0	0	GATS7p	Geary autocorrelation - lag 7 / weighted by polarizabilities	2D
1198	0	0	nHBAcc2	Number of hydrogen bond acceptors (any oxygen; any nitrogen where the formal charge of the nitrogen is non-positive (i.e. formal charge <= 0) except a non-aromatic nitrogen that is adjacent to an oxygen and aromatic ring, or an aromatic nitrogen with a hydrogen atom in a ring, or an aromatic nitrogen with 3 neighouring atoms in a ring, or a nitrogen with total bond order >=4; any fluorine)	2D
1379	0	0	GGI2	Topological charge index of order 2	2D
1286	0	0	MPC9	Molecular path count of order 9	2D
783	0	0.001	SwHBd	Sum of E-States for weak hydrogen bond donors	2D
1036	0	0	maxHsNH2	Maximum atom-type H E-State: -NH2	2D
437	0	0	EE_Dzi	Estrada-like index from Barysz matrix / weighted by first ionization potential (ln(1+x))	2D
653	0	0	SpAD_Dt	Spectral absolute deviation from detour matrix	2D
1793	0	0	Au	A total size index / unweighted	3D
905	0	0	minHBint2	Minimum E-State descriptors of strength for potential Hydrogen Bonds of path length 2	2D
465	0	0	nBonds	Number of bonds (excluding bonds with hydrogen)	2D
1340	0	0	n6HeteroRing	Number of 6-membered rings containing heteroatoms (N, O, P, S, or halogens)	2D
1523	0	0	TDB10r	3D topological distance based autocorrelation - lag 10 / weighted by covalent radius	3D
527	0	0	SpMax4_Bhp	Largest absolute eigenvalue of Burden modified matrix - n 4 / weighted by relative polarizabilities	2D
1334	0	0	nT12Ring	Number of 12-membered rings (includes counts from fused rings)	2D
1462	0	0	TDB9m	3D topological distance based autocorrelation - lag 9 / weighted by mass	3D
1076	0	0.001	maxssNH	Maximum atom-type E-State: -NH-	2D
689	0	0.001	nHCHnX	Count of atom-type H E-State: CHnX	2D
606	0	0	SP-1	Simple path, order 1	2D
398	0	0	EE_Dzv	Estrada-like index from Barysz matrix / weighted by van der Waals volumes (ln(1+x))	2D
44	0	0	ATS5e	Broto-Moreau autocorrelation - lag 5 / weighted by Sanderson electronegativities	2D
47	0	0	ATS8e	Broto-Moreau autocorrelation - lag 8 / weighted by Sanderson electronegativities	2D
572	0	0.001	C1SP1	Triply bound carbon bound to one other carbon	2D
483	0	0	SpMax8_Bhm	Largest absolute eigenvalue of Burden modified matrix - n 8 / weighted by relative mass	2D
407	0	0	SpMax_Dze	Leading eigenvalue from Barysz matrix / weighted by Sanderson electronegativities	2D
33	0	0	ATS3v	Broto-Moreau autocorrelation - lag 3 / weighted by van der Waals volumes	2D
786	0	0	SHBint2	Sum of E-State descriptors of strength for potential hydrogen bonds of path length 2	2D
1289	0	0	piPC1	Conventional bond order ID number of order 1 (ln(1+x)	2D
1382	0	0	GGI5	Topological charge index of order 5	2D
1570	0	0	MOMI-R	Radius of gyration	3D
621	0	0	VP-0	Valence path, order 0	2D
592	0	0	SC-4	Simple cluster, order 4	2D
394	0	0	SpMax_Dzv	Leading eigenvalue from Barysz matrix / weighted by van der Waals volumes	2D
611	0	0	SP-6	Simple path, order 6	2D
1772	0	0	RDF100s	Radial distribution function - 100 / weighted by relative I-state	3D
1688	0	0	RDF130e	Radial distribution function - 130 / weighted by relative Sanderson electronegativities	3D
1306	0	0	n6Ring	Number of 6-membered rings	2D
58	0	0	ATS1i	Broto-Moreau autocorrelation - lag 1 / weighted by first ionization potential	2D
1199	0	0	nHBAcc3	Number of hydrogen bond acceptors (any oxygen; any nitrogen where the formal charge of the nitrogen is non-positive (i.e. formal charge <= 0) except a non-aromatic nitrogen that is adjacent to an oxygen and aromatic ring, or an aromatic nitrogen with a hydrogen atom in a ring, or an aromatic nitrogen with 3 neighouring atoms in a ring, or a nitrogen with total bond order >=4, or a nitrogen in an …	2D
1213	0	0	TIC3	Total information content index (neighborhood symmetry of 3-order)	2D
432	0	0	SpAbs_Dzi	Graph energy from Barysz matrix / weighted by first ionization potential	2D
652	0	0	SpDiam_Dt	Spectral diameter from detour matrix	2D
654	0	0	SpMAD_Dt	Spectral mean absolute deviation from detour matrix	2D
1857	0	0	Ti	T total size index / weighted by relative first ionization potential	3D
71	0	0	ATS5s	Broto-Moreau autocorrelation - lag 5 / weighted by I-state	2D
1215	0	0	TIC5	Total information content index (neighborhood symmetry of 5-order)	2D
26	0	0	ATS5m	Broto-Moreau autocorrelation - lag 5 / weighted by mass	2D
1627	0	0	RDF125m	Radial distribution function - 125 / weighted by relative mass	3D
587	0	0	VCH-4	Valence chain, order 4	2D
480	0	0	SpMax5_Bhm	Largest absolute eigenvalue of Burden modified matrix - n 5 / weighted by relative mass	2D
65	0	0	ATS8i	Broto-Moreau autocorrelation - lag 8 / weighted by first ionization potential	2D
1376	0	0	topoDiameter	Topological diameter (maximum atom eccentricity)	2D
576	0	0	C3SP2	Doubly bound carbon bound to three other carbons	2D
668	0	0	nHBint3	Count of E-State descriptors of strength for potential Hydrogen Bonds of path length 3	2D
433	0	0	SpMax_Dzi	Leading eigenvalue from Barysz matrix / weighted by first ionization potential	2D
7	0	0	nAtom	Number of atoms	2D
655	0	0	EE_Dt	Estrada-like index from detour matrix	2D
74	0	0	ATS8s	Broto-Moreau autocorrelation - lag 8 / weighted by I-state	2D
812	0	0	SHother	Sum of atom-type H E-State: H�on aaCH, dCH2 or dsCH	2D
54	0	0	ATS6p	Broto-Moreau autocorrelation - lag 6 / weighted by polarizabilities	2D
421	0	0	SpDiam_Dzp	Spectral diameter from Barysz matrix / weighted by polarizabilities	2D
651	0	0	SpMax_Dt	Leading eigenvalue from detour matrix	2D
1288	0	0	TPC	Total path count (up to order 10)	2D
1321	0	0	nF10Ring	Number of 10-membered fused rings	2D
640	0	0	Sare	Sum of atomic Allred-Rochow electronegativities (scaled on carbon atom)	2D
385	0	0	EE_Dzm	Estrada-like index from Barysz matrix / weighted by mass (ln(1+x))	2D
1296	0	0	piPC8	Conventional bond order ID number of order 8 (ln(1+x)	2D
1684	0	0	RDF110e	Radial distribution function - 110 / weighted by relative Sanderson electronegativities	3D
1253	0	0	McGowan_Volume	McGowan characteristic volume	2D
424	0	0	EE_Dzp	Estrada-like index from Barysz matrix / weighted by polarizabilities (ln(1+x))	2D
1735	0	0	RDF65i	Radial distribution function - 065 / weighted by relative first ionization potential	3D
1290	0	0	piPC2	Conventional bond order ID number of order 2 (ln(1+x)	2D
1779	0	0	RDF135s	Radial distribution function - 135 / weighted by relative I-state	3D
1679	0	0	RDF85e	Radial distribution function - 085 / weighted by relative Sanderson electronegativities	3D
1652	0	0	RDF100v	Radial distribution function - 100 / weighted by relative van der Waals volumes	3D
73	0	0	ATS7s	Broto-Moreau autocorrelation - lag 7 / weighted by I-state	2D
1246	0	0	Kier1	First kappa shape index	2D
802	0	0	SHssNH2p	Sum of atom-type H E-State: -NH2-+	2D
1846	0	0	Vp	V total size index / weighted by relative polarizabilities	3D
1723	0	0	RDF155p	Radial distribution function - 155 / weighted by relative polarizabilities	3D
1599	0	0	RDF135u	Radial distribution function - 135 / unweighted	3D
1111	0	0	maxsCl	Maximum atom-type E-State: -Cl	2D
1741	0	0	RDF95i	Radial distribution function - 095 / weighted by relative first ionization potential	3D
1400	0	0	SpDiam_D	Spectral diameter from topological distance matrix	2D
1419	0	0	MWC8	Molecular walk count of order 8 (ln(1+x)	2D
1587	0	0	RDF75u	Radial distribution function - 075 / unweighted	3D
436	0	0	SpMAD_Dzi	Spectral mean absolute deviation from Barysz matrix / weighted by first ionization potential	2D
1423	0	0	SRW2	Self-returning walk count of order 2 (ln(1+x)	2D
1021	0	0	maxwHBd	Maximum E-States for weak Hydrogen Bond donors	2D
1595	0	0	RDF115u	Radial distribution function - 115 / unweighted	3D
1714	0	0	RDF110p	Radial distribution function - 110 / weighted by relative polarizabilities	3D
679	0	0	nHsNH2	Count of atom-type H E-State: -NH2	2D
1556	0	0	GRAVH-1	Gravitational index - hydrogens included	3D
1653	0	0	RDF105v	Radial distribution function - 105 / weighted by relative van der Waals volumes	3D
28	0	0	ATS7m	Broto-Moreau autocorrelation - lag 7 / weighted by mass	2D
1832	0	0	Ae	A total size index / weighted by relative Sanderson electronegativities	3D
72	0	0	ATS6s	Broto-Moreau autocorrelation - lag 6 / weighted by I-state	2D
1073	0	0	maxsNH2	Maximum atom-type E-State: -NH2	2D
642	0	0	Si	Sum of first first ionization potentials (scaled on carbon atom)	2D
91	0	0	AATS7v	Average Broto-Moreau autocorrelation - lag 7 / weighted by van der Waals volumes	2D
1717	0	0	RDF125p	Radial distribution function - 125 / weighted by relative polarizabilities	3D
1272	0	0	MDEN-33	Molecular distance edge between all tertiary nitrogens	2D
1283	0	0	MPC6	Molecular path count of order 6	2D
36	0	0	ATS6v	Broto-Moreau autocorrelation - lag 6 / weighted by van der Waals volumes	2D
1361	0	0	nT5HeteroRing	Number of 5-membered rings (includes counts from fused rings) containing heteroatoms (N, O, P, S, or halogens)	2D
1065	0	0	maxsssCH	Maximum atom-type E-State: >CH-	2D
1683	0	0	RDF105e	Radial distribution function - 105 / weighted by relative Sanderson electronegativities	3D
1681	0	0	RDF95e	Radial distribution function - 095 / weighted by relative Sanderson electronegativities	3D
1739	0	0	RDF85i	Radial distribution function - 085 / weighted by relative first ionization potential	3D
4	0	0	apol	Sum of the atomic polarizabilities (including implicit hydrogens)	2D
1555	0	0	GRAV-3	Cube root of gravitational index of heavy atoms	3D
1593	0	0	RDF105u	Radial distribution function - 105 / unweighted	3D
499	0	0	SpMax8_Bhv	Largest absolute eigenvalue of Burden modified matrix - n 8 / weighted by relative van der Waals volumes	2D
1441	0	0	WPOL	Weiner polarity number	2D
1557	0	0	GRAVH-2	Square root of hydrogen-included gravitational index	3D
17	0	0	nCl	Number of chlorine atoms	2D
56	0	0	ATS8p	Broto-Moreau autocorrelation - lag 8 / weighted by polarizabilities	2D
1682	0	0	RDF100e	Radial distribution function - 100 / weighted by relative Sanderson electronegativities	3D
1742	0	0	RDF100i	Radial distribution function - 100 / weighted by relative first ionization potential	3D
989	0	0	minddssS	Minimum atom-type E-State: >S==	2D
1378	0	0	GGI1	Topological charge index of order 1	2D
1656	0	0	RDF120v	Radial distribution function - 120 / weighted by relative van der Waals volumes	3D
1833	0	0	Ve	V total size index / weighted by relative Sanderson electronegativities	3D
393	0	0	SpAbs_Dzv	Graph energy from Barysz matrix / weighted by van der Waals volumes	2D
1630	0	0	RDF140m	Radial distribution function - 140 / weighted by relative mass	3D
862	0	0	SdsssP	Sum of atom-type E-State: ->P=	2D
1859	0	0	Vi	V total size index / weighted by relative first ionization potential	3D
1713	0	0	RDF105p	Radial distribution function - 105 / weighted by relative polarizabilities	3D
1687	0	0	RDF125e	Radial distribution function - 125 / weighted by relative Sanderson electronegativities	3D
1152	0	0	ETA_Alpha	Sum of alpha values of all non-hydrogen vertices of a molecule	2D
38	0	0	ATS8v	Broto-Moreau autocorrelation - lag 8 / weighted by van der Waals volumes	2D
790	0	0	SHBint6	Sum of E-State descriptors of strength for potential hydrogen bonds of path length 6	2D
45	0	0	ATS6e	Broto-Moreau autocorrelation - lag 6 / weighted by Sanderson electronegativities	2D
1395	0	0	JGI8	Mean topological charge index of order 8	2D
14	0	0	nS	Number of sulphur atoms	2D
367	0	0	SpAbs_DzZ	Graph energy from Barysz matrix / weighted by atomic number	2D
1443	0	0	Zagreb	Sum of the squares of atom degree over all heavy atoms i	2D
469	0	0	nBondsS3	Total number of single bonds (excluding bonds to hydrogens and aromatic bonds)	2D
1422	0	0	TWC	Total walk count (up to order 10)	2D
1314	0	0	nFRing	Number of fused rings	2D
467	0	0	nBondsS	Number of single bonds (including bonds with hydrogen)	2D
730	0	0	ndO	Count of atom-type E-State: =O	2D
921	0	0	minHssNH2p	Minimum atom-type H E-State: -NH2-+	2D
1188	0	0	ETA_Eta_R_L	Local index Eta_local for reference alkane	2D
1285	0	0	MPC8	Molecular path count of order 8	2D
1711	0	0	RDF95p	Radial distribution function - 095 / weighted by relative polarizabilities	3D
1420	0	0	MWC9	Molecular walk count of order 9 (ln(1+x)	2D
866	0	0	SdS	Sum of atom-type E-State: =S	2D
372	0	0	EE_DzZ	Estrada-like index from Barysz matrix / weighted by atomic number (ln(1+x))	2D
1060	0	0	maxdCH2	Maximum atom-type E-State: =CH2	2D
870	0	0	SddssS	Sum of atom-type E-State: >S==	2D
1592	0	0	RDF100u	Radial distribution function - 100 / unweighted	3D
1657	0	0	RDF125v	Radial distribution function - 125 / weighted by relative van der Waals volumes	3D
474	0	0	nBondsM	Total number of bonds that have bond order greater than one (aromatic bonds have bond order 1.5).	2D
1677	0	0	RDF75e	Radial distribution function - 075 / weighted by relative Sanderson electronegativities	3D
1654	0	0	RDF110v	Radial distribution function - 110 / weighted by relative van der Waals volumes	3D
1736	0	0	RDF70i	Radial distribution function - 070 / weighted by relative first ionization potential	3D
1196	0	0	fragC	Complexity of a system	2D
1776	0	0	RDF120s	Radial distribution function - 120 / weighted by relative I-state	3D
1777	0	0	RDF125s	Radial distribution function - 125 / weighted by relative I-state	3D
1284	0	0	MPC7	Molecular path count of order 7	2D
1716	0	0	RDF120p	Radial distribution function - 120 / weighted by relative polarizabilities	3D
1287	0	0	MPC10	Molecular path count of order 10	2D
1267	0	0	MDEN-11	Molecular distance edge between all primary nitrogens	2D
1067	0	0	maxtsC	Maximum atom-type E-State: #C-	2D
1770	0	0	RDF90s	Radial distribution function - 090 / weighted by relative I-state	3D
734	0	0	nsOm	Count of atom-type E-State: -O-	2D
1751	0	0	RDF145i	Radial distribution function - 145 / weighted by relative first ionization potential	3D
842	0	0	SdsN	Sum of atom-type E-State: =N-	2D
1366	0	0	nT10HeteroRing	Number of 10-membered rings (includes counts from fused rings) containing heteroatoms (N, O, P, S, or halogens)	2D
471	0	0	nBondsD2	Total number of double bonds (excluding bonds to aromatic bonds)	2D
1298	0	0	piPC10	Conventional bond order ID number of order 10 (ln(1+x)	2D
1367	0	0	nT11HeteroRing	Number of 11-membered rings (includes counts from fused rings) containing heteroatoms (N, O, P, S, or halogens)	2D
1743	0	0	RDF105i	Radial distribution function - 105 / weighted by relative first ionization potential	3D
466	0	0	nBonds2	Total number of bonds (including bonds to hydrogens)	2D
1685	0	0	RDF115e	Radial distribution function - 115 / weighted by relative Sanderson electronegativities	3D
748	0	0	nssS	Count of atom-type E-State: -S-	2D
510	0	0	SpMax3_Bhe	Largest absolute eigenvalue of Burden modified matrix - n 3 / weighted by relative Sanderson electronegativities	2D
1744	0	0	RDF110i	Radial distribution function - 110 / weighted by relative first ionization potential	3D
1676	0	0	RDF70e	Radial distribution function - 070 / weighted by relative Sanderson electronegativities	3D
27	0	0	ATS6m	Broto-Moreau autocorrelation - lag 6 / weighted by mass	2D
1383	0	0	GGI6	Topological charge index of order 6	2D
8	0	0	nHeavyAtom	Number of heavy atoms (i.e. not hydrogen)	2D
1493	0	0	TDB10p	3D topological distance based autocorrelation - lag 10 / weighted by polarizabilities	3D
1358	0	0	nFG12HeteroRing	Number of >12-membered fused rings containing heteroatoms (N, O, P, S, or halogens)	2D
1601	0	0	RDF145u	Radial distribution function - 145 / unweighted	3D
579	0	0	C3SP3	Singly bound carbon bound to three other carbons	2D
1429	0	0	SRW8	Self-returning walk count of order 8 (ln(1+x)	2D
981	0	0	mindsssP	Minimum atom-type E-State: ->P=	2D
1302	0	0	nRing	Number of rings	2D
1291	0	0	piPC3	Conventional bond order ID number of order 3 (ln(1+x)	2D
1715	0	0	RDF115p	Radial distribution function - 115 / weighted by relative polarizabilities	3D
1745	0	0	RDF115i	Radial distribution function - 115 / weighted by relative first ionization potential	3D
1032	0	0	maxHBint10	Maximum E-State descriptors of strength for potential Hydrogen Bonds of path length 10	2D
1660	0	0	RDF140v	Radial distribution function - 140 / weighted by relative van der Waals volumes	3D
1774	0	0	RDF110s	Radial distribution function - 110 / weighted by relative I-state	3D
1104	0	0	maxdS	Maximum atom-type E-State: =S	2D
920	0	0	minHsNH3p	Minimum atom-type H E-State: -NH3+	2D
912	0	0	minHBint9	Minimum E-State descriptors of strength for potential Hydrogen Bonds of path length 9	2D
1749	0	0	RDF135i	Radial distribution function - 135 / weighted by relative first ionization potential	3D
1642	0	0	RDF50v	Radial distribution function - 050 / weighted by relative van der Waals volumes	3D
64	0	0	ATS7i	Broto-Moreau autocorrelation - lag 7 / weighted by first ionization potential	2D
1043	0	0	maxHdCH2	Maximum atom-type H E-State: =CH2	2D
1279	0	0	MPC2	Molecular path count of order 2	2D
911	0	0	minHBint8	Minimum E-State descriptors of strength for potential Hydrogen Bonds of path length 8	2D
682	0	0	nHsNH3p	Count of atom-type H E-State: -NH3+	2D
1603	0	0	RDF155u	Radial distribution function - 155 / unweighted	3D
1042	0	0	maxHtCH	Maximum atom-type H E-State: #CH	2D
1030	0	0	maxHBint8	Maximum E-State descriptors of strength for potential Hydrogen Bonds of path length 8	2D
1268	0	0	MDEN-12	Molecular distance edge between all primary and secondary nitrogens	2D
1602	0	0	RDF150u	Radial distribution function - 150 / unweighted	3D
1074	0	0	maxssNH2p	Maximum atom-type E-State: -NH2-+	2D
953	0	0	minsNH3p	Minimum atom-type E-State: -NH3+	2D
1028	0	0	maxHBint6	Maximum E-State descriptors of strength for potential Hydrogen Bonds of path length 6	2D
1655	0	0	RDF115v	Radial distribution function - 115 / weighted by relative van der Waals volumes	3D
458	0	0	nBase	Number of basic groups. The list of basic groups is defined by this SMARTS "[$([NH2]-[CX4])]", "[$([NH](-[CX4])-[CX4])]", "[$(N(-[CX4])(-[CX4])-[CX4])]", "[$([*;+;!$(*~[*;-])])]", "[$(N=C-N)]", and "[$(N-C=N)]" originally presented in JOELib	2D
1624	0	0	RDF110m	Radial distribution function - 110 / weighted by relative mass	3D
793	0	0	SHBint9	Sum of E-State descriptors of strength for potential hydrogen bonds of path length 9	2D
1039	0	0	maxHsNH3p	Maximum atom-type H E-State: -NH3+	2D
1628	0	0	RDF130m	Radial distribution function - 130 / weighted by relative mass	3D
1173	0	0	ETA_Beta_s	A measure of electronegative atom count of the molecule	2D
1386	0	0	GGI9	Topological charge index of order 9	2D
910	0	0	minHBint7	Minimum E-State descriptors of strength for potential Hydrogen Bonds of path length 7	2D
1374	0	0	LipinskiFailures	Number failures of the Lipinski's Rule Of 5	2D
1661	0	0	RDF145v	Radial distribution function - 145 / weighted by relative van der Waals volumes	3D
685	0	0	nHtCH	Count of atom-type H E-State: #CH	2D
683	0	0	nHssNH2p	Count of atom-type H E-State: -NH2-+	2D
722	0	0	nsssNHp	Count of atom-type E-State: >NH-+	2D
1775	0	0	RDF115s	Radial distribution function - 115 / weighted by relative I-state	3D
1778	0	0	RDF130s	Radial distribution function - 130 / weighted by relative I-state	3D
1773	0	0	RDF105s	Radial distribution function - 105 / weighted by relative I-state	3D
1594	0	0	RDF110u	Radial distribution function - 110 / unweighted	3D
1328	0	0	nT6Ring	Number of 6-membered rings (includes counts from fused rings)	2D
1092	0	0	maxsF	Maximum atom-type E-State: -F	2D
1769	0	0	RDF85s	Radial distribution function - 085 / weighted by relative I-state	3D
1626	0	0	RDF120m	Radial distribution function - 120 / weighted by relative mass	3D
664	0	0	nwHBd	Count of E-States for weak Hydrogen Bond donors	2D
1041	0	0	maxHsssNHp	Maximum atom-type H E-State: >NH-+	2D
1783	0	0	RDF155s	Radial distribution function - 155 / weighted by relative I-state	3D
794	0	0	SHBint10	Sum of E-State descriptors of strength for potential hydrogen bonds of path length 10	2D
1320	0	0	nF9Ring	Number of 9-membered fused rings	2D
580	0	0	C4SP3	Singly bound carbon bound to four other carbons	2D
1621	0	0	RDF95m	Radial distribution function - 095 / weighted by relative mass	3D
1080	0	0	maxdsN	Maximum atom-type E-State: =N-	2D
1719	0	0	RDF135p	Radial distribution function - 135 / weighted by relative polarizabilities	3D
1596	0	0	RDF120u	Radial distribution function - 120 / unweighted	3D
804	0	0	SHtCH	Sum of atom-type H E-State: #CH	2D
1718	0	0	RDF130p	Radial distribution function - 130 / weighted by relative polarizabilities	3D
943	0	0	mintCH	Minimum atom-type E-State: #CH	2D
1375	0	0	topoRadius	Topological radius (minimum atom eccentricity)	2D
46	0	0	ATS7e	Broto-Moreau autocorrelation - lag 7 / weighted by Sanderson electronegativities	2D
1325	0	0	nTRing	Number of rings (includes counts from fused rings)	2D
1658	0	0	RDF130v	Radial distribution function - 130 / weighted by relative van der Waals volumes	3D
834	0	0	SsNH3p	Sum of atom-type E-State: -NH3+	2D
841	0	0	SsssNHp	Sum of atom-type E-State: >NH-+	2D
1780	0	0	RDF140s	Radial distribution function - 140 / weighted by relative I-state	3D
1079	0	0	maxsssNHp	Maximum atom-type E-State: >NH-+	2D
913	0	0	minHBint10	Minimum E-State descriptors of strength for potential Hydrogen Bonds of path length 10	2D
808	0	0	SHCHnX	Sum of atom-type H E-State: CHnX	2D
16	0	0	nF	Number of fluorine atoms	2D
854	0	0	SsF	Sum of atom-type E-State: -F	2D
675	0	0	nHBint10	Count of E-State descriptors of strength for potential Hydrogen Bonds of path length 10	2D
1625	0	0	RDF115m	Radial distribution function - 115 / weighted by relative mass	3D
791	0	0	SHBint7	Sum of E-State descriptors of strength for potential hydrogen bonds of path length 7	2D
1598	0	0	RDF130u	Radial distribution function - 130 / unweighted	3D
705	0	0	ntCH	Count of atom-type E-State: #CH	2D
1387	0	0	GGI10	Topological charge index of order 10	2D
1600	0	0	RDF140u	Radial distribution function - 140 / unweighted	3D
803	0	0	SHsssNHp	Sum of atom-type H E-State: >NH-+	2D
684	0	0	nHsssNHp	Count of atom-type H E-State: >NH-+	2D
829	0	0	StsC	Sum of atom-type E-State: #C-	2D
1353	0	0	nF8HeteroRing	Number of 8-membered fused rings containing heteroatoms (N, O, P, S, or halogens)	2D
680	0	0	nHssNH	Count of atom-type H E-State: -NH-	2D
1752	0	0	RDF150i	Radial distribution function - 150 / weighted by relative first ionization potential	3D
922	0	0	minHsssNHp	Minimum atom-type H E-State: >NH-+	2D
1750	0	0	RDF140i	Radial distribution function - 140 / weighted by relative first ionization potential	3D
1686	0	0	RDF120e	Radial distribution function - 120 / weighted by relative Sanderson electronegativities	3D
1632	0	0	RDF150m	Radial distribution function - 150 / weighted by relative mass	3D
1072	0	0	maxsNH3p	Maximum atom-type E-State: -NH3+	2D
1332	0	0	nT10Ring	Number of 10-membered rings (includes counts from fused rings)	2D
719	0	0	nssNH	Count of atom-type E-State: -NH-	2D
1355	0	0	nF10HeteroRing	Number of 10-membered fused rings containing heteroatoms (N, O, P, S, or halogens)	2D
1721	0	0	RDF145p	Radial distribution function - 145 / weighted by relative polarizabilities	3D
735	0	0	nsF	Count of atom-type E-State: -F	2D
1329	0	0	nT7Ring	Number of 7-membered rings (includes counts from fused rings)	2D
674	0	0	nHBint9	Count of E-State descriptors of strength for potential Hydrogen Bonds of path length 9	2D
955	0	0	minssNH2p	Minimum atom-type E-State: -NH2-+	2D
1659	0	0	RDF135v	Radial distribution function - 135 / weighted by relative van der Waals volumes	3D
822	0	0	SdCH2	Sum of atom-type E-State: =CH2	2D
1689	0	0	RDF135e	Radial distribution function - 135 / weighted by relative Sanderson electronegativities	3D
867	0	0	SssS	Sum of atom-type E-State: -S-	2D
1691	0	0	RDF145e	Radial distribution function - 145 / weighted by relative Sanderson electronegativities	3D
1692	0	0	RDF150e	Radial distribution function - 150 / weighted by relative Sanderson electronegativities	3D
715	0	0	nsNH3p	Count of atom-type E-State: -NH3+	2D
1663	0	0	RDF155v	Radial distribution function - 155 / weighted by relative van der Waals volumes	3D
1629	0	0	RDF135m	Radial distribution function - 135 / weighted by relative mass	3D
1631	0	0	RDF145m	Radial distribution function - 145 / weighted by relative mass	3D
703	0	0	ndCH2	Count of atom-type E-State: =CH2	2D
1693	0	0	RDF155e	Radial distribution function - 155 / weighted by relative Sanderson electronegativities	3D
586	0	0	VCH-3	Valence chain, order 3	2D
805	0	0	SHdCH2	Sum of atom-type H E-State: =CH2	2D
1337	0	0	n3HeteroRing	Number of 3-membered rings containing heteroatoms (N, O, P, S, or halogens)	2D
1040	0	0	maxHssNH2p	Maximum atom-type H E-State: -NH2-+	2D
672	0	0	nHBint7	Count of E-State descriptors of strength for potential Hydrogen Bonds of path length 7	2D
836	0	0	SssNH2p	Sum of atom-type E-State: -NH2-+	2D
986	0	0	minssS	Minimum atom-type E-State: -S-	2D
18	0	0	nBr	Number of bromine atoms	2D
5	0	0	naAromAtom	Number of aromatic atoms	2D
10	0	0	nB	Number of boron atoms	2D
15	0	0	nP	Number of phosphorus atoms	2D
19	0	0	nI	Number of iodine atoms	2D
6	0	0	nAromBond	Number of aromatic bonds	2D
937	0	0	minssBH	Minimum atom-type E-State: -BH-	2D
472	0	0	nBondsT	Number of triple bonds	2D
1055	0	0	maxsBH2	Maximum atom-type E-State: -BH2	2D
1070	0	0	maxaaaC	Maximum atom-type E-State: ::C:	2D
1069	0	0	maxaasC	Maximum atom-type E-State: :C:-	2D
1066	0	0	maxddC	Maximum atom-type E-State: =C=	2D
1064	0	0	maxaaCH	Maximum atom-type E-State: :CH:	2D
1062	0	0	maxtCH	Maximum atom-type E-State: #CH	2D
1058	0	0	maxssssBm	Maximum atom-type E-State: >B<-	2D
1057	0	0	maxsssB	Maximum atom-type E-State: -B<	2D
1056	0	0	maxssBH	Maximum atom-type E-State: -BH-	2D
1054	0	0	maxssssBem	Maximum atom-type E-State: >Be<-2	2D
1018	0	0	minsssPbH	Minimum atom-type E-State: >PbH-	2D
1053	0	0	maxssBe	Maximum atom-type E-State: -Be-	2D
1052	0	0	maxsLi	Maximum atom-type E-State: -Li	2D
1051	0	0	maxHmisc	Maximum atom-type H E-State: H�bonded to B, Si, P, Ge, As, Se, Sn or Pb	2D
1049	0	0	maxHAvin	Maximum atom-type H E-State: H�on C vinyl bonded to C aromatic	2D
1045	0	0	maxHaaCH	Maximum atom-type H E-State: :CH:	2D
1038	0	0	maxHaaNH	Maximum atom-type H E-State: :NH:	2D
1035	0	0	maxHsSH	Maximum atom-type H E-State: -SH	2D
1034	0	0	maxHdNH	Maximum atom-type H E-State: =NH	2D
1071	0	0	maxssssC	Maximum atom-type E-State: >C<	2D
1075	0	0	maxdNH	Maximum atom-type E-State: =NH	2D
1077	0	0	maxaaNH	Maximum atom-type E-State: :NH:	2D
1078	0	0	maxtN	Maximum atom-type E-State: #N	2D
1103	0	0	maxsSH	Maximum atom-type E-State: -SH	2D
1102	0	0	maxsssssP	Maximum atom-type E-State: ->P<	2D
1101	0	0	maxddsP	Maximum atom-type E-State: -=P=	2D
1100	0	0	maxdsssP	Maximum atom-type E-State: ->P=	2D
1099	0	0	maxsssP	Maximum atom-type E-State: >P-	2D
1098	0	0	maxssPH	Maximum atom-type E-State: -PH-	2D
1097	0	0	maxsPH2	Maximum atom-type E-State: -PH2	2D
1096	0	0	maxssssSi	Maximum atom-type E-State: >Si<	2D
1095	0	0	maxsssSiH	Maximum atom-type E-State: >SiH-	2D
1094	0	0	maxssSiH2	Maximum atom-type E-State: -SiH2-	2D
1093	0	0	maxsSiH3	Maximum atom-type E-State: -SiH3	2D
1090	0	0	maxaOm	Maximum atom-type E-State: :O-0.5	2D
1089	0	0	maxaaO	Maximum atom-type E-State: :O:	2D
1085	0	0	maxssssNp	Maximum atom-type E-State: >N<+	2D
1084	0	0	maxaasN	Maximum atom-type E-State: :N:-	2D
1083	0	0	maxddsN	Maximum atom-type E-State: -N<<	2D
1081	0	0	maxaaN	Maximum atom-type E-State: :N:	2D
1019	0	0	minssssPb	Minimum atom-type E-State: >Pb<	2D
1017	0	0	minssPbH2	Minimum atom-type E-State: -PbH2-	2D
1106	0	0	maxaaS	Maximum atom-type E-State: aSa	2D
983	0	0	minsssssP	Minimum atom-type E-State: ->P<	2D
994	0	0	minssGeH2	Minimum atom-type E-State: -GeH2-	2D
993	0	0	minsGeH3	Minimum atom-type E-State: -GeH3	2D
991	0	0	minSm	Minimum atom-type E-State: -S-	2D
990	0	0	minssssssS	Minimum atom-type E-State: >S<<	2D
988	0	0	mindssS	Minimum atom-type E-State: >S=	2D
987	0	0	minaaS	Minimum atom-type E-State: aSa	2D
985	0	0	mindS	Minimum atom-type E-State: =S	2D
984	0	0	minsSH	Minimum atom-type E-State: -SH	2D
982	0	0	minddsP	Minimum atom-type E-State: -=P=	2D
1016	0	0	minsPbH3	Minimum atom-type E-State: -PbH3	2D
980	0	0	minsssP	Minimum atom-type E-State: >P-	2D
979	0	0	minssPH	Minimum atom-type E-State: -PH-	2D
978	0	0	minsPH2	Minimum atom-type E-State: -PH2	2D
977	0	0	minssssSi	Minimum atom-type E-State: >Si<	2D
976	0	0	minsssSiH	Minimum atom-type E-State: >SiH-	2D
975	0	0	minssSiH2	Minimum atom-type E-State: -SiH2-	2D
974	0	0	minsSiH3	Minimum atom-type E-State: -SiH3	2D
973	0	0	minsF	Minimum atom-type E-State: -F	2D
995	0	0	minsssGeH	Minimum atom-type E-State: >GeH-	2D
996	0	0	minssssGe	Minimum atom-type E-State: >Ge<	2D
997	0	0	minsAsH2	Minimum atom-type E-State: -AsH2	2D
998	0	0	minssAsH	Minimum atom-type E-State: -AsH-	2D
1015	0	0	minsI	Minimum atom-type E-State: -I	2D
1014	0	0	minssssSn	Minimum atom-type E-State: >Sn<	2D
1013	0	0	minsssSnH	Minimum atom-type E-State: >SnH-	2D
1012	0	0	minssSnH2	Minimum atom-type E-State: -SnH2-	2D
1011	0	0	minsSnH3	Minimum atom-type E-State: -SnH3	2D
1010	0	0	minsBr	Minimum atom-type E-State: -Br	2D
1009	0	0	minddssSe	Minimum atom-type E-State: -=Se=-	2D
1008	0	0	minssssssSe	Minimum atom-type E-State: >Se<<	2D
1007	0	0	mindssSe	Minimum atom-type E-State: >Se=	2D
1006	0	0	minaaSe	Minimum atom-type E-State: aSea	2D
1005	0	0	minssSe	Minimum atom-type E-State: -Se-	2D
1004	0	0	mindSe	Minimum atom-type E-State: =Se	2D
1003	0	0	minsSeH	Minimum atom-type E-State: -SeH	2D
1002	0	0	minsssssAs	Minimum atom-type E-State: ->As<	2D
1001	0	0	minddsAs	Minimum atom-type E-State: -=As=	2D
1000	0	0	mindsssAs	Minimum atom-type E-State: ->As=	2D
999	0	0	minsssAs	Minimum atom-type E-State: >As-	2D
1105	0	0	maxssS	Maximum atom-type E-State: -S-	2D
1107	0	0	maxdssS	Maximum atom-type E-State: >S=	2D
970	0	0	minaaO	Minimum atom-type E-State: :O:	2D
1335	0	0	nTG12Ring	Number of >12-membered rings (includes counts from fused rings)	2D
1347	0	0	nG12HeteroRing	Number of >12-membered rings containing heteroatoms (N, O, P, S, or halogens)	2D
1346	0	0	n12HeteroRing	Number of 12-membered rings containing heteroatoms (N, O, P, S, or halogens)	2D
1345	0	0	n11HeteroRing	Number of 11-membered rings containing heteroatoms (N, O, P, S, or halogens)	2D
1344	0	0	n10HeteroRing	Number of 10-membered rings containing heteroatoms (N, O, P, S, or halogens)	2D
1343	0	0	n9HeteroRing	Number of 9-membered rings containing heteroatoms (N, O, P, S, or halogens)	2D
1342	0	0	n8HeteroRing	Number of 8-membered rings containing heteroatoms (N, O, P, S, or halogens)	2D
1341	0	0	n7HeteroRing	Number of 7-membered rings containing heteroatoms (N, O, P, S, or halogens)	2D
1338	0	0	n4HeteroRing	Number of 4-membered rings containing heteroatoms (N, O, P, S, or halogens)	2D
1333	0	0	nT11Ring	Number of 11-membered rings (includes counts from fused rings)	2D
1315	0	0	nF4Ring	Number of 4-membered fused rings	2D
1330	0	0	nT8Ring	Number of 8-membered rings (includes counts from fused rings)	2D
1326	0	0	nT4Ring	Number of 4-membered rings (includes counts from fused rings)	2D
1324	0	0	nFG12Ring	Number of >12-membered fused rings	2D
1323	0	0	nF12Ring	Number of 12-membered fused rings	2D
1322	0	0	nF11Ring	Number of 11-membered fused rings	2D
1319	0	0	nF8Ring	Number of 8-membered fused rings	2D
1318	0	0	nF7Ring	Number of 7-membered fused rings	2D
1317	0	0	nF6Ring	Number of 6-membered fused rings	2D
1348	0	0	nFHeteroRing	Number of fused rings containing heteroatoms (N, O, P, S, or halogens)	2D
1349	0	0	nF4HeteroRing	Number of 4-membered fused rings containing heteroatoms (N, O, P, S, or halogens)	2D
1350	0	0	nF5HeteroRing	Number of 5-membered fused rings containing heteroatoms (N, O, P, S, or halogens)	2D
1351	0	0	nF6HeteroRing	Number of 6-membered fused rings containing heteroatoms (N, O, P, S, or halogens)	2D
1753	0	0	RDF155i	Radial distribution function - 155 / weighted by relative first ionization potential	3D
1748	0	0	RDF130i	Radial distribution function - 130 / weighted by relative first ionization potential	3D
1746	0	0	RDF120i	Radial distribution function - 120 / weighted by relative first ionization potential	3D
1722	0	0	RDF150p	Radial distribution function - 150 / weighted by relative polarizabilities	3D
1690	0	0	RDF140e	Radial distribution function - 140 / weighted by relative Sanderson electronegativities	3D
1662	0	0	RDF150v	Radial distribution function - 150 / weighted by relative van der Waals volumes	3D
1424	0	0	SRW3	Self-returning walk count of order 3 (ln(1+x)	2D
1369	0	0	nTG12HeteroRing	Number of >12-membered rings (includes counts from fused rings) containing heteroatoms (N, O, P, S, or halogens)	2D
1368	0	0	nT12HeteroRing	Number of 12-membered rings (includes counts from fused rings) containing heteroatoms (N, O, P, S, or halogens)	2D
1365	0	0	nT9HeteroRing	Number of 9-membered rings (includes counts from fused rings) containing heteroatoms (N, O, P, S, or halogens)	2D
1364	0	0	nT8HeteroRing	Number of 8-membered rings (includes counts from fused rings) containing heteroatoms (N, O, P, S, or halogens)	2D
1363	0	0	nT7HeteroRing	Number of 7-membered rings (includes counts from fused rings) containing heteroatoms (N, O, P, S, or halogens)	2D
1360	0	0	nT4HeteroRing	Number of 4-membered rings (includes counts from fused rings) containing heteroatoms (N, O, P, S, or halogens)	2D
1359	0	0	nTHeteroRing	Number of rings (includes counts from fused rings) containing heteroatoms (N, O, P, S, or halogens)	2D
1357	0	0	nF12HeteroRing	Number of 12-membered fused rings containing heteroatoms (N, O, P, S, or halogens)	2D
1356	0	0	nF11HeteroRing	Number of 11-membered fused rings containing heteroatoms (N, O, P, S, or halogens)	2D
1352	0	0	nF7HeteroRing	Number of 7-membered fused rings containing heteroatoms (N, O, P, S, or halogens)	2D
1316	0	0	nF5Ring	Number of 5-membered fused rings	2D
1313	0	0	nG12Ring	Number of >12-membered rings	2D
1108	0	0	maxddssS	Maximum atom-type E-State: >S==	2D
1119	0	0	maxdsssAs	Maximum atom-type E-State: ->As=	2D
1127	0	0	maxssssssSe	Maximum atom-type E-State: >Se<<	2D
1126	0	0	maxdssSe	Maximum atom-type E-State: >Se=	2D
1125	0	0	maxaaSe	Maximum atom-type E-State: aSea	2D
1124	0	0	maxssSe	Maximum atom-type E-State: -Se-	2D
1123	0	0	maxdSe	Maximum atom-type E-State: =Se	2D
1122	0	0	maxsSeH	Maximum atom-type E-State: -SeH	2D
1121	0	0	maxsssssAs	Maximum atom-type E-State: ->As<	2D
1120	0	0	maxddsAs	Maximum atom-type E-State: -=As=	2D
1118	0	0	maxsssAs	Maximum atom-type E-State: >As-	2D
1312	0	0	n12Ring	Number of 12-membered rings	2D
1117	0	0	maxssAsH	Maximum atom-type E-State: -AsH-	2D
1116	0	0	maxsAsH2	Maximum atom-type E-State: -AsH2	2D
1115	0	0	maxssssGe	Maximum atom-type E-State: >Ge<	2D
1114	0	0	maxsssGeH	Maximum atom-type E-State: >GeH-	2D
1113	0	0	maxssGeH2	Maximum atom-type E-State: -GeH2-	2D
1112	0	0	maxsGeH3	Maximum atom-type E-State: -GeH3	2D
1110	0	0	maxSm	Maximum atom-type E-State: -S-	2D
1109	0	0	maxssssssS	Maximum atom-type E-State: >S<<	2D
1128	0	0	maxddssSe	Maximum atom-type E-State: -=Se=-	2D
1129	0	0	maxsBr	Maximum atom-type E-State: -Br	2D
1130	0	0	maxsSnH3	Maximum atom-type E-State: -SnH3	2D
1131	0	0	maxssSnH2	Maximum atom-type E-State: -SnH2-	2D
1311	0	0	n11Ring	Number of 11-membered rings	2D
1310	0	0	n10Ring	Number of 10-membered rings	2D
1309	0	0	n9Ring	Number of 9-membered rings	2D
1308	0	0	n8Ring	Number of 8-membered rings	2D
1307	0	0	n7Ring	Number of 7-membered rings	2D
1304	0	0	n4Ring	Number of 4-membered rings	2D
1263	0	0	MDEC-44	Molecular distance edge between all quaternary carbons	2D
1180	0	0	ETA_BetaP_ns_d	A measure of lone electrons entering into resonance relative to molecular size	2D
1179	0	0	ETA_Beta_ns_d	A measure of lone electrons entering into resonance	2D
1167	0	0	ETA_dPsi_B	A measure of hydrogen bonding propensity of the molecules	2D
1138	0	0	maxssssPb	Maximum atom-type E-State: >Pb<	2D
1137	0	0	maxsssPbH	Maximum atom-type E-State: >PbH-	2D
1136	0	0	maxssPbH2	Maximum atom-type E-State: -PbH2-	2D
1135	0	0	maxsPbH3	Maximum atom-type E-State: -PbH3	2D
1134	0	0	maxsI	Maximum atom-type E-State: -I	2D
1133	0	0	maxssssSn	Maximum atom-type E-State: >Sn<	2D
1132	0	0	maxsssSnH	Maximum atom-type E-State: >SnH-	2D
971	0	0	minaOm	Minimum atom-type E-State: :O-0.5	2D
966	0	0	minssssNp	Minimum atom-type E-State: >N<+	2D
473	0	0	nBondsQ	Number of quadruple bonds	2D
760	0	0	nssAsH	Count of atom-type E-State: -AsH-	2D
768	0	0	naaSe	Count of atom-type E-State: aSea	2D
767	0	0	nssSe	Count of atom-type E-State: -Se-	2D
766	0	0	ndSe	Count of atom-type E-State: =Se	2D
765	0	0	nsSeH	Count of atom-type E-State: -SeH	2D
764	0	0	nsssssAs	Count of atom-type E-State: ->As<	2D
763	0	0	nddsAs	Count of atom-type E-State: -=As=	2D
762	0	0	ndsssAs	Count of atom-type E-State: ->As=	2D
761	0	0	nsssAs	Count of atom-type E-State: >As-	2D
759	0	0	nsAsH2	Count of atom-type E-State: -AsH2	2D
747	0	0	ndS	Count of atom-type E-State: =S	2D
758	0	0	nssssGe	Count of atom-type E-State: >Ge<	2D
757	0	0	nsssGeH	Count of atom-type E-State: >GeH-	2D
756	0	0	nssGeH2	Count of atom-type E-State: -GeH2-	2D
755	0	0	nsGeH3	Count of atom-type E-State: -GeH3	2D
753	0	0	nSm	Count of atom-type E-State: -S-	2D
752	0	0	nssssssS	Count of atom-type E-State: >S<<	2D
751	0	0	nddssS	Count of atom-type E-State: >S==	2D
750	0	0	ndssS	Count of atom-type E-State: >S=	2D
769	0	0	ndssSe	Count of atom-type E-State: >Se=	2D
770	0	0	nssssssSe	Count of atom-type E-State: >Se<<	2D
771	0	0	nddssSe	Count of atom-type E-State: -=Se=-	2D
772	0	0	nsBr	Count of atom-type E-State: -Br	2D
815	0	0	SssBe	Sum of atom-type E-State: -Be-	2D
814	0	0	SsLi	Sum of atom-type E-State: -Li	2D
813	0	0	SHmisc	Sum of atom-type H E-State: H�bonded to B, Si, P, Ge, As, Se, Sn or Pb	2D
811	0	0	SHAvin	Sum of atom-type H E-State: H�on C vinyl bonded to C aromatic	2D
807	0	0	SHaaCH	Sum of atom-type H E-State: :CH:	2D
800	0	0	SHaaNH	Sum of atom-type H E-State: :NH:	2D
797	0	0	SHsSH	Sum of atom-type H E-State: -SH	2D
796	0	0	SHdNH	Sum of atom-type H E-State: =NH	2D
781	0	0	nssssPb	Count of atom-type E-State: >Pb<	2D
780	0	0	nsssPbH	Count of atom-type E-State: >PbH-	2D
779	0	0	nssPbH2	Count of atom-type E-State: -PbH2-	2D
778	0	0	nsPbH3	Count of atom-type E-State: -PbH3	2D
777	0	0	nsI	Count of atom-type E-State: -I	2D
776	0	0	nssssSn	Count of atom-type E-State: >Sn<	2D
775	0	0	nsssSnH	Count of atom-type E-State: >SnH-	2D
774	0	0	nssSnH2	Count of atom-type E-State: -SnH2-	2D
773	0	0	nsSnH3	Count of atom-type E-State: -SnH3	2D
749	0	0	naaS	Count of atom-type E-State: aSa	2D
746	0	0	nsSH	Count of atom-type E-State: -SH	2D
817	0	0	SsBH2	Sum of atom-type E-State: -BH2	2D
695	0	0	nsLi	Count of atom-type E-State: -Li	2D
709	0	0	nddC	Count of atom-type E-State: =C=	2D
707	0	0	naaCH	Count of atom-type E-State: :CH:	2D
701	0	0	nssssBm	Count of atom-type E-State: >B<-	2D
700	0	0	nsssB	Count of atom-type E-State: -B<	2D
699	0	0	nssBH	Count of atom-type E-State: -BH-	2D
698	0	0	nsBH2	Count of atom-type E-State: -BH2	2D
697	0	0	nssssBem	Count of atom-type E-State: >Be<-2	2D
696	0	0	nssBe	Count of atom-type E-State: -Be-	2D
694	0	0	nHmisc	Count of atom-type H E-State: H�bonded to B, Si, P, Ge, As, Se, Sn or Pb	2D
745	0	0	nsssssP	Count of atom-type E-State: ->P<	2D
692	0	0	nHAvin	Count of atom-type H E-State: H�on C vinyl bonded to C aromatic	2D
688	0	0	nHaaCH	Count of atom-type H E-State: :CH:	2D
686	0	0	nHdCH2	Count of atom-type H E-State: =CH2	2D
681	0	0	nHaaNH	Count of atom-type H E-State: :NH:	2D
678	0	0	nHsSH	Count of atom-type H E-State: -SH	2D
677	0	0	nHdNH	Count of atom-type H E-State: =NH	2D
581	0	0	SCH-3	Simple chain, order 3	2D
573	0	0	C2SP1	Triply bound carbon bound to two other carbons	2D
710	0	0	ntsC	Count of atom-type E-State: #C-	2D
712	0	0	naasC	Count of atom-type E-State: :C:-	2D
713	0	0	naaaC	Count of atom-type E-State: ::C:	2D
717	0	0	nssNH2p	Count of atom-type E-State: -NH2-+	2D
744	0	0	nddsP	Count of atom-type E-State: -=P=	2D
743	0	0	ndsssP	Count of atom-type E-State: ->P=	2D
742	0	0	nsssP	Count of atom-type E-State: >P-	2D
741	0	0	nssPH	Count of atom-type E-State: -PH-	2D
740	0	0	nsPH2	Count of atom-type E-State: -PH2	2D
739	0	0	nssssSi	Count of atom-type E-State: >Si<	2D
738	0	0	nsssSiH	Count of atom-type E-State: >SiH-	2D
737	0	0	nssSiH2	Count of atom-type E-State: -SiH2-	2D
736	0	0	nsSiH3	Count of atom-type E-State: -SiH3	2D
733	0	0	naOm	Count of atom-type E-State: :O-0.5	2D
732	0	0	naaO	Count of atom-type E-State: :O:	2D
728	0	0	nssssNp	Count of atom-type E-State: >N<+	2D
727	0	0	naasN	Count of atom-type E-State: :N:-	2D
726	0	0	nddsN	Count of atom-type E-State: -N<<	2D
724	0	0	naaN	Count of atom-type E-State: :N:	2D
720	0	0	naaNH	Count of atom-type E-State: :NH:	2D
718	0	0	ndNH	Count of atom-type E-State: =NH	2D
816	0	0	SssssBem	Sum of atom-type E-State: >Be<-2	2D
818	0	0	SssBH	Sum of atom-type E-State: -BH-	2D
965	0	0	minaasN	Minimum atom-type E-State: :N:-	2D
896	0	0	SsI	Sum of atom-type E-State: -I	2D
923	0	0	minHtCH	Minimum atom-type H E-State: #CH	2D
919	0	0	minHaaNH	Minimum atom-type H E-State: :NH:	2D
916	0	0	minHsSH	Minimum atom-type H E-State: -SH	2D
915	0	0	minHdNH	Minimum atom-type H E-State: =NH	2D
900	0	0	SssssPb	Sum of atom-type E-State: >Pb<	2D
899	0	0	SsssPbH	Sum of atom-type E-State: >PbH-	2D
898	0	0	SssPbH2	Sum of atom-type E-State: -PbH2-	2D
897	0	0	SsPbH3	Sum of atom-type E-State: -PbH3	2D
895	0	0	SssssSn	Sum of atom-type E-State: >Sn<	2D
885	0	0	SdSe	Sum of atom-type E-State: =Se	2D
894	0	0	SsssSnH	Sum of atom-type E-State: >SnH-	2D
893	0	0	SssSnH2	Sum of atom-type E-State: -SnH2-	2D
892	0	0	SsSnH3	Sum of atom-type E-State: -SnH3	2D
891	0	0	SsBr	Sum of atom-type E-State: -Br	2D
890	0	0	SddssSe	Sum of atom-type E-State: -=Se=-	2D
889	0	0	SssssssSe	Sum of atom-type E-State: >Se<<	2D
888	0	0	SdssSe	Sum of atom-type E-State: >Se=	2D
887	0	0	SaaSe	Sum of atom-type E-State: aSea	2D
924	0	0	minHdCH2	Minimum atom-type H E-State: =CH2	2D
926	0	0	minHaaCH	Minimum atom-type H E-State: :CH:	2D
930	0	0	minHAvin	Minimum atom-type H E-State: H�on C vinyl bonded to C aromatic	2D
932	0	0	minHmisc	Minimum atom-type H E-State: H�bonded to B, Si, P, Ge, As, Se, Sn or Pb	2D
964	0	0	minddsN	Minimum atom-type E-State: -N<<	2D
962	0	0	minaaN	Minimum atom-type E-State: :N:	2D
959	0	0	mintN	Minimum atom-type E-State: #N	2D
958	0	0	minaaNH	Minimum atom-type E-State: :NH:	2D
956	0	0	mindNH	Minimum atom-type E-State: =NH	2D
951	0	0	minaaaC	Minimum atom-type E-State: ::C:	2D
950	0	0	minaasC	Minimum atom-type E-State: :C:-	2D
948	0	0	mintsC	Minimum atom-type E-State: #C-	2D
947	0	0	minddC	Minimum atom-type E-State: =C=	2D
945	0	0	minaaCH	Minimum atom-type E-State: :CH:	2D
941	0	0	mindCH2	Minimum atom-type E-State: =CH2	2D
939	0	0	minssssBm	Minimum atom-type E-State: >B<-	2D
938	0	0	minsssB	Minimum atom-type E-State: -B<	2D
936	0	0	minsBH2	Minimum atom-type E-State: -BH2	2D
935	0	0	minssssBem	Minimum atom-type E-State: >Be<-2	2D
934	0	0	minssBe	Minimum atom-type E-State: -Be-	2D
933	0	0	minsLi	Minimum atom-type E-State: -Li	2D
886	0	0	SssSe	Sum of atom-type E-State: -Se-	2D
884	0	0	SsSeH	Sum of atom-type E-State: -SeH	2D
819	0	0	SsssB	Sum of atom-type E-State: -B<	2D
840	0	0	StN	Sum of atom-type E-State: #N	2D
856	0	0	SssSiH2	Sum of atom-type E-State: -SiH2-	2D
855	0	0	SsSiH3	Sum of atom-type E-State: -SiH3	2D
852	0	0	SaOm	Sum of atom-type E-State: :O-0.5	2D
851	0	0	SaaO	Sum of atom-type E-State: :O:	2D
847	0	0	SssssNp	Sum of atom-type E-State: >N<+	2D
846	0	0	SaasN	Sum of atom-type E-State: :N:-	2D
845	0	0	SddsN	Sum of atom-type E-State: -N<<	2D
843	0	0	SaaN	Sum of atom-type E-State: :N:	2D
839	0	0	SaaNH	Sum of atom-type E-State: :NH:	2D
883	0	0	SsssssAs	Sum of atom-type E-State: ->As<	2D
838	0	0	SssNH	Sum of atom-type E-State: -NH-	2D
837	0	0	SdNH	Sum of atom-type E-State: =NH	2D
832	0	0	SaaaC	Sum of atom-type E-State: ::C:	2D
831	0	0	SaasC	Sum of atom-type E-State: :C:-	2D
828	0	0	SddC	Sum of atom-type E-State: =C=	2D
826	0	0	SaaCH	Sum of atom-type E-State: :CH:	2D
824	0	0	StCH	Sum of atom-type E-State: #CH	2D
820	0	0	SssssBm	Sum of atom-type E-State: >B<-	2D
857	0	0	SsssSiH	Sum of atom-type E-State: >SiH-	2D
858	0	0	SssssSi	Sum of atom-type E-State: >Si<	2D
859	0	0	SsPH2	Sum of atom-type E-State: -PH2	2D
860	0	0	SssPH	Sum of atom-type E-State: -PH-	2D
882	0	0	SddsAs	Sum of atom-type E-State: -=As=	2D
881	0	0	SdsssAs	Sum of atom-type E-State: ->As=	2D
880	0	0	SsssAs	Sum of atom-type E-State: >As-	2D
879	0	0	SssAsH	Sum of atom-type E-State: -AsH-	2D
878	0	0	SsAsH2	Sum of atom-type E-State: -AsH2	2D
877	0	0	SssssGe	Sum of atom-type E-State: >Ge<	2D
876	0	0	SsssGeH	Sum of atom-type E-State: >GeH-	2D
875	0	0	SssGeH2	Sum of atom-type E-State: -GeH2-	2D
874	0	0	SsGeH3	Sum of atom-type E-State: -GeH3	2D
872	0	0	SSm	Sum of atom-type E-State: -S-	2D
871	0	0	SssssssS	Sum of atom-type E-State: >S<<	2D
869	0	0	SdssS	Sum of atom-type E-State: >S=	2D
868	0	0	SaaS	Sum of atom-type E-State: aSa	2D
865	0	0	SsSH	Sum of atom-type E-State: -SH	2D
864	0	0	SsssssP	Sum of atom-type E-State: ->P<	2D
863	0	0	SddsP	Sum of atom-type E-State: -=P=	2D
861	0	0	SsssP	Sum of atom-type E-State: >P-	2D
0	0	0	nAcid	Number of acidic groups. The list of acidic groups is defined by these SMARTS "$([O;H1]-[C,S,P]=O)", "$([*;-;!$(*~[*;+])])", "$([NH](S(=O)=O)C(F)(F)F)", and "$(n1nnnc1)" originally presented in JOELib	2D
	importance	number of descriptors		percentual contribution to RF model
top 5 descriptors	0.138	-		0.152486
average 5 descriptors	0.00241591	-		0.00241591
descriptor characterizing presence of nitrogen	0.039	6		0.0065
average descriptor	0.905	1873		0.000483182
IP-related descriptor	0.144	134		0.00107463
average descriptor	0.905	1873		0.000483182
