# Supplementary material for: Quantitative structure–activity relationships for primary aerobic biodegradation of organic chemicals in pristine surface waters: starting points for predicting biodegradation under acclimatization
Source: Royal Society of Chemistry journal article supplement (doi:10.1039/c7em00375g), 2017-11-14
Supplement: c7em00375g3.xlsx [file c7em00375g3.xlsx]

## Sheet: Sheet1
compound	valence	smiles	logkb	kb	ref	rygr (radius of gyration)	ASA (Solvent-accessible surface area)	V (molecular volume)	TPSA (molinsp)	PSA	logkow (molinsp)	ASA
2,4-dichlorophenoxyacetic acid (2,4-D)	anionic	[O-]C(=O)COC1=C(Cl)C=C(Cl)C=C1	-11.5	3.16228e-12	Torang (2003)	2.947	391.584	161.16	49.36	50.458	-0.19	391.584	-11.5
acrylic acid	anionic	[O-]C(=O)C=C	-9.6	2.51189e-10	Mackay handbook of physical-chemical properties; Howard: Handbook of Environmental Degradation Rates; Capel and Larson (1995)	1.508	228.486	64.62	40.13	23.471	-2.51	228.486	-9.6
gemfibrozil	anionic	CC1=CC(OCCCC(C)(C)C([O-])=O)=C(C)C=C1	-12	1e-12	Boix et al. (2016); Baena-Nogueras et al. (2017)	3.283	506.688	250.44	49.36	51.928	1.05	506.688	-12
ibuprofen	anionic	CC(C)CC1=CC=C(C=C1)C(C)C([O-])=O	-11.7	1.99526e-12	Boix et al. (2016); Baena-Nogueras et al. (2017)	3.297	463.325	208.44	40.13	57.771	0.75	463.325	-11.7
acetic acid	anionic	CC([O-])=O	-10.2	6.30957e-11	Mackay handbook of physical-chemical properties	1.257	208.1	53.45	40.13	71.429	-2.78	208.1	-10.2
dicamba	anionic	COC1=C(Cl)C=CC(Cl)=C1C([O-])=O	-11.6	2.51189e-12	Scifres et al. (1973)	2.641	370.324	160.92	49.36	58.651	-0.29	370.324	-11.6
endothall	anionic	[O-]C(=O)C1C2CCC(O2)C1C([O-])=O	-10.9	1.25893e-11	Hiltibran (1962)	2.86	401.799	149.37	89.49	238.307	-2.8	401.799	-10.9
candesartan	anionic	CCOC1=NC2=CC=CC(C([O-])=O)=C2N1CC1=CC=C(C=C1)C1=CC=CC=C1C1=NNN=N1	-10.8		AstraZeneca data	4.189	693.942	379.4	121.66		1.47
Phenylbutazone	anionic	CCCCC1=C(N(N(C1=O)C2=CC=CC=C2)C3=CC=CC=C3)[O-]	-10.7	1.99526e-11	Baena-Nogueras et al. (2017)	3.455	579.208	288.82	50	67.255	1.09	579.208	-10.7
Naproxen	anionic	CC(C1=CC2=C(C=C1)C=C(C=C2)OC)C(=O)[O-]	-11.8	1.58489e-12	Baena-Nogueras et al. (2017)	3.434	465.111	211.23	49.36	74.199	0.66	465.111	-11.8
Indomethacin	anionic	CC1=C(C2=C(N1C(=O)C3=CC=C(C=C3)Cl)C=CC(=C2)OC)CC(=O)[O-]	-10.8	1.58489e-11	Baena-Nogueras et al. (2017)	4.013	598.898	300.5	71.37	92.432	1.27	598.898	-10.8
crizotinib	cationic	[H][C@](C)(OC1=CC(=CN=C1N)C1=CN(N=C1)C1CC[NH2+]CC1)C1=C(Cl)C=CC(F)=C1Cl	-12	1e-12	PHIZER CONFIDENTIAL DATA	4.986	703.831	376.15	82.58	63.195	1.34	703.831	-12
sertraline	cationic	C[NH2+][C@H]1CC[C@@H](C2=CC(Cl)=C(Cl)C=C2)C2=CC=CC=C12	-11.9	1.25892e-12	Lam et al. (2004)	3.616	573.216	268.88	16.61	5.027	1.87	573.216	-11.9
venlafaxine	cationic	COC1=CC=C(C=C1)C(C[NH+](C)C)C1(O)CCCCC1	-12	1e-12	Boix et al. (2016); Gasser et al. (2012)	3.314	536.529	289.93	33.9	50.93	0.65	536.529	-12
dimethylamine	cationic	CC[NH2+]CC	-9.6	2.51189e-10	Howard: Handbook of Environmental Fate and Exposure Data For Organic Chemicals, Volume 2	1.599	281.994	92.74	16.61	15.905	-2.17	281.994	-9.6
propranolol	cationic	CC(C)[NH2+]CC(O)COC1=CC=CC2=CC=CC=C12	-11	1e-11	Lin et al. (2010); Baena-Nogueras et al. (2017)	3.882	530.693	258.8	46.07	36.586	0.02	530.693	-11
metoprolol	cationic	COCCC1=CC=C(OCC(O)C[NH2+]C(C)C)C=C1	-11.2	6.30957e-12	Liu et al. (2009); Baena-Nogueras et al. (2017)	4.603	577.72	273.95	55.3	61.83	-0.98	577.72	-11.2
atenolol	cationic	CC(C)[NH2+]CC(O)COC1=CC=C(CC(N)=O)C=C1	-11.5	3.16228e-12	Liu et al. (2009); Baena-Nogueras et al. (2017)	3.976	557.627	261.88	89.16	142.178	-2.23	557.627	-11.5
acebutolol	cationic	CCCC(=O)NC1=CC(C(C)=O)=C(OCC(O)C[NH2+]C(C)C)C=C1	-11.6	2.51189e-12	Lin et al. (2010)	4.761	666.294	331.9	92.24	155.534	-0.7	666.294	-11.6
O-desmethylvenlafaxine	cationic	C[NH+](C)CC(C1=CC=C(O)C=C1)C1(O)CCCCC1	-11.7	1.99526e-12	Gasser et al. (2012)	3.066	503.307	272.4	44.89	92.43	0.12	503.307	-11.7
Timolol	cationic	CC(C)(C)[NH2+]CC(COC1=NSN=C1N2CCOCC2)O	-11.2	6.30957e-12	Baena-Nogueras et al. (2017)	3.251	534.582	291.57	84.32	101.898	-1.91	534.582	-11.2
Nadolol	cationic	CC(C)(C)[NH2+]CC(COC1=CC=CC2=C1CC(C(C2)O)O)O	-10.9	1.25893e-11	Baena-Nogueras et al. (2017)	3.574	566.62	303.5	86.52	154.449	-1.86	566.62	-10.9
Fluoxetine	cationic	C[NH2+]CCC(C1=CC=CC=C1)OC2=CC=C(C=C2)C(F)(F)F	-11.2	6.30957e-12	Baena-Nogueras et al. (2017)	3.681	574.455	276.11	25.84	21.077	1.51	574.455	-11.2
Amitriptiline	cationic	C[NH+](C)CCC=C1C2=CC=CC=C2CCC3=CC=CC=C31	-11.8	1.58489e-12	Baena-Nogueras et al. (2017)	3.515	559.343	288.25	4.44	14.129	1.03	559.343	-11.8
4,6-dinitro-o-cresol	anionic	CC1=CC(=CC(=C1[O-])[N+]([O-])=O)[N+]([O-])=O	-10.9	1.25893e-11	Mackay handbook of physical-chemical properties; Capel and Larson (1995)	2.708	368.899	152.55	114.7	204.624	-1.11	368.899	-10.9
benzoic acid	anionic	[O-]C(=O)C1=CC=CC=C1	-9.6	2.51189e-10	Mackay handbook of physical-chemical properties; Pubchem	2.105	298.036	108.3	40.13	55.902	-1.56	298.036	-9.6
diclofenac	anionic	[O-]C(=O)CC1=CC=CC=C1NC1=C(Cl)C=CC=C1Cl	-11.8	1.58489e-12	Lam et al. (2004); Cormier et al. (2015); Baena-Nogueras et al. (2017)	3.188	485.228	235.99	52.16	59.959	1.85	485.228	-11.8
clofibric acid	anionic	CC(C)(OC1=CC=C(Cl)C=C1)C([O-])=O	-12	1e-12	Araujo et al. (2014)	3.154	408.543	180.45	49.36	62.026	0.01	408.543	-12
atorvastatin	anionic	CC(C)C1=C(C(=O)NC2=CC=CC=C2)C(=C(N1CC[C@@H](O)C[C@@H](O)CC([O-])=O)C1=CC=C(F)C=C1)C1=CC=CC=C1	-11.8	1.58489e-12	Lam et al. (2004)	4.243	806.464	511.06	114.62	105.604	2.63	806.464	-11.8
Ketoprofen	anionic	CC(C1=CC=CC(=C1)C(=O)C2=CC=CC=C2)C(=O)[O-]	-11.8	1.58489e-12	Baena-Nogueras et al. (2017)	3.407	503.277	232.08	57.2	78.034	0.88	503.277	-11.8
Fenoprofen	anionic	CC(C1=CC(=CC=C1)OC2=CC=CC=C2)C(=O)[O-]	-11.8	1.58489e-12	Baena-Nogueras et al. (2017)	3.174	482.705	222.08	49.36	58.247	1.18	482.705	-11.8
Mefenamic acid	anionic	CC1=C(C(=CC=C1)NC2=CC=CC=C2C(=O)[O-])C	-11.4	3.98107e-12	Baena-Nogueras et al. (2017)	3.25	472.113	225.24	52.16	90.52	1.18	472.113	-11.4
Salicylic acid	anionic	C1=CC=C(C(=C1)C(=O)O)[O-]	-9.69	2.03882e-10	Baena-Nogueras et al. (2017), lake water and seawater values; pubchem	2.158	310.442	116.32	60.36	149.38	-1.81	310.442	-9.69062
chloroquine	cationic	CC[NH+](CC)CCCC(C)NC1=C2C=CC(Cl)=CC2=[NH+]C=C1	-11.7	1.99526e-12	Tappin et al. (2016)	3.059	539.751	319.08	30.6	39.915	1.91	539.751	-11.7
fluphenazine	cationic	OCC[NH+]1CCN(CCCN2C3=CC=CC=C3SC3=C2C=C(C=C3)C(F)(F)F)CC1	-11.7	1.99526e-12	Tappin et al. (2016)	4.209	676.501	383.89	32.84	83.154	1.35	676.501	-11.7
quinine	cationic	COC1=CC2=C(C=CN=C2C=C1)[C@@H](O)[C@@H]1C[C@@H]2CC[NH+]1C[C@@H]2C=C	-11.7	1.99526e-12	Tappin et al. (2016)	3.463	583.662	313.9	46.79	83.526	-0.1	583.662	-11.7
diethanolamine	cationic	OCC[NH2+]CCO	-10.5	3.16228e-11	Pubchem	1.819	301.54	109.26	57.06	81.239	-4.17	301.54	-10.5
Albuterol	cationic	CC(C)(C)[NH2+]CC(C1=CC(=C(C=C1)O)CO)O	-11.8	1.58489e-12	Baena-Nogueras et al. (2017)	2.96	490.256	238.09	77.29	111.332	-1.66	490.256	-11.8
formate	anionic	C(=O)[O-]	-9.77815	1.66667e-10	Pubchem	1.003	171.043	36.89	40.13	171.015	-3.23	171.043	-9.77815
carbonmonoxide	zwitterionic(?)	[C-]#[O+]	-9.47712	3.33333e-10	Tolli et al. 2006	0.58	144.966	30.45	17.06		-2.88	144.966	-9.47712
fulvic acid	anionic	O1C(O[H])(C2=CC=C3C(=O)C4C(O)COC(C5C=C(CC([O-])=O)OC6C(C7CC=CC(=O)C7)C=CCC5=6)C=4OC3=C2)CC2=C(C(=O)C3=C(O2)C=C(O[H])C(O[H])=C3C([O-])=O)C1	-12.7086	1.95618e-13	Bastviken et al. (2004)	5.467	947.288	644.78	266.36		0.12	947.288	-12.7086
oxolinic acid	anionic	CCN1C=C(C(=O)C2=CC3=C(C=C21)OCO3)C(=O)[O-]	-12.0869	8.18599e-13	Lai et al. (2008); Kummerer et al. (2009)	3.264	466.929	213.94	80.6	143.434	-2.39	466.929	-12.0869
tartaric acid	anionic	C(C(C(=O)[O-])O)(C(=O)[O-])O	-11.2253	5.95238e-12	Berggren et al. (2010)	3.347	412.486	110.84	120.71	300.039	-4.72	412.486	-11.2253
succinic acid	anionic	C(CC(=O)[O-])C(=O)[O-]	-11.5263	2.97619e-12	Berggren et al. (2010)	2.979	375.392	94.76	80.26	298.205	-3.22	375.392	-11.5263
oxalic acid	anionic	C(=O)(C(=O)[O-])[O-]	-11.5263	2.97619e-12	Berggren et al. (2010)	2.785	281.821	61.15	80.26	306.861	-3.76	281.821	-11.5263
malic acid	anionic	C(C(C(=O)[O-])O)C(=O)[O-]	-11.5263	2.97619e-12	Berggren et al. (2010)	2.845	366.154	102.8	100.48	299.884	-4.13	366.154	-11.5263
lactic acid	anionic	CC(C(=O)[O-])O	-10.2253	5.95238e-11	Berggren et al. (2010)	1.621	251.653	78.3	60.36	107.15	-3.42	251.653	-10.2253
glycolic acid	anionic	C(C(=O)[O-])O	-11.0102	9.76682e-12	Berggren et al. (2010); Wright (1975)	1.491	222.492	61.71	60.36	112.532	-3.79	222.492	-11.0102
citric acid	anionic	C(C(=O)[O-])C(CC(=O)[O-])(C(=O)[O-])O	-10.2253	5.95238e-11	Berggren et al. (2010)	2.424	346.723	143.54	140.61	165.955	-4.33	346.723	-10.2253
lysine	cationic	C(CC[NH3+])CC(C(=O)[O-])[NH3+]	-10.3345	4.62963e-11	Berggren et al. (2010)	2.501	370.008	145.1	95.41	153.952	-3.05	370.008	-10.3345
aspartic acid	anionic	C(C(C(=O)[O-])[NH3+])C(=O)[O-]	-10.2253	5.95238e-11	Berggren et al. (2010)	1.807	297.846	106.87	107.9	186.492	-3.97	297.846	-10.2253
Glutamic acid	anionic	C(CC(=O)[O-])C(C(=O)[O-])[NH3+]	-10.2253	5.95238e-11	Berggren et al. (2010)	2.368	321.405	123.67	107.9	176.729	-3.7	321.405	-10.2253
polyacrylic acid	anionic	C(C(=O)[O-])(CC(C(=O)[O-])CC(C(=O)[O-])CC(C(=O)[O-])CC(C(=O)[O-])CC(C(=O)[O-])CC(C(=O)[O-])CC(CC(C([O-])=O)CC(C([O-])=O)CC(C([O-])=O)CC(C([O-])=O)CC(C([O-])=O)CC(C([O-])=O)C(O)C([O-])=O)C([O-])=O)CO	-12.7146	1.9292e-13	Negewo BB. 2012. Renewable Energy Desalination: An Emerging Solution to Close the Water Gap in the Middle East and North Africa. Chapter 6: 6. Environmental Impacts of CSP Desalination; Ekebafe et al. (2011)	7.1	1297.11	880.19	642.38		-4.18	1297.11	-12.7146
peramivir	zwitterionic	O([H])[C@@]1[C@@](C(=O)[O-])C[C@]([C@]1([H])[C@](C(CC)CC)N([H])C(C)=O)/[N+](/[H])=C(\N([H])[H])/N([H])[H]	-11.8573	1.38889e-12	Azuma et al. (2017)	3.099	577.153	302.72	155.47	216.554	-3.61	577.153	-11.8573
Laninamivir	zwitterionic	O1C(C(=O)[O-])=C[C@@]([C@]([C@]1([H])[C@@]([C@@](CO[H])O[H])OC)N([H])C(C)=O)/[N+](/[H])=C(\N([H])[H])/N([H])[H]	-11.8573	1.38889e-12	Azuma et al. (2017)	3.235	559.021	289.13	194.17	371.68	-5.18	559.021	-11.8573
oseltamivir carboxylate	zwitterionic	CCC(CC)O[C@@H]1C=C(C[C@H]([NH3+])[C@H]1NC(C)=O)C([O-])=O	-11.9187	1.20596e-12	Accinelli et al. (2010); Azuma et al. (2017)	2.874	536.568	273.33	106.1	186.216	-2.2	536.568	-11.9187
Amantadine	cationic	C1C2CC3CC1CC(C2)(C3)[NH3+]	-11.8573	1.38889e-12	Azuma et al. (2017)	1.986	351.126	160	27.64		-0.09	351.126	-11.8573
Zanamivir	zwitterionic	CC(=O)NC1[C@@H](OC(=CC1[NH+]=C(N)N)C(=O)[O-])C(C(CO)O)O	-11.8573	1.38889e-12	Azuma et al. (2017)	3.308	538.842	284.08	205.16	389.53	-5.29	538.842	-11.8573
2-methylaminoethanol	cationic	C[NH2+]CCO	-10.6	2.51189e-11	Booth et al.; Pubchem	1.437	266.041	84.2	36.83	27.757	-3.55	266.041	-10.6
cyclohexane carboxylic acid	anionic	C1CCC(CC1)C(=O)[O-]	-11.6355	2.31481e-12	Wang et al. (2016)	2.138	323.129	126.89	40.13	44.554	-0.87	323.129	-11.6355
n-butanoic acid	anionic	CCCC(=O)[O-]	-9.98227	1.04167e-10	Takemoto et al.; Pubchem	1.738	266.32	87.06	40.13	63.286	-1.72	266.32	-9.98227
benzylamine	cationic	C1=CC=C(C=C1)C[NH3+]	-9.68124	2.08333e-10	Subba-Rao and Alexander (1982); Pubchem	2.044	315.632	112.93	27.64	3.449	-1.42	315.632	-9.68124
4-hydroxybenzoic acid	anionic	C1=CC(=CC=C1C(=O)[O-])[OH]	-11.2253	5.95238e-12	Gerike et al. (1979); Madsen et al. (1991); Pubchem	2.359	311.766	116.32	60.36	127.472	-2.04	311.766	-11.2253
Anthranilic acid	anionic	C1=CC=C(C(=C1)C(=O)[O-])N	-11.2253	5.95238e-12	Shelton et al. (1981); Pubchem	2.157	311.123	119.59	66.15	131.351	-2.13	311.123	-11.2253
Diquat	cationic	C1C[N+]2=CC=CC=C2C3=CC=CC=[N+]31	-11.6362	2.31125e-12	Mackay handbook of physical-chemical properties; Simsiman et al. (1976); Pubchem	2.596	394.459	176.37	7.77	30.075	-5.4	394.459	-11.6362
benzenesulfonate	anionic	C1=CC=C(C=C1)S(=O)(=O)[O-]	-10.9823	1.04167e-11	Urano et al. (1986); Urano et al. (1986); Pubchem	2.333	328.084	120.75	57.2	136.985	-2.13	328.084	-10.9823
allylamine	cationic	C=CC[NH3+]	-10.5761	2.65393e-11	Pubchem	1.527	246.369	69.26	27.64	26.843	-2.37	246.369	-10.5761
desipramine	cationic	C[NH2+]CCCN1C2=CC=CC=C2CCC3=CC=CC=C31	-11.8274	1.4881e-12	Khaleel et al. (2016)	3.303	521.405	271.34	19.84	8.802	0.9	521.405	-11.8274
Amphetamine	cationic	CC(CC1=CC=CC=C1)[NH3+]	-10.3802	4.16667e-11	Bagnall et al. (2013); Pubchem	2.294	356.983	146.32	27.64		-0.85	356.983	-10.3802
Methamphetamine	cationic	CC(CC1=CC=CC=C1)[NH2+]C	-10.6232	2.38095e-11	Bagnall et al. (2013); Pubchem	2.438	374.714	164.17	16.61	6.099	-0.75	374.714	-10.6232
Isopropylamine	cationic	CC(C)[NH3+]	-10.5563	2.77778e-11	IUCLID Dataset on Isopropylamine. European Commission, European Chemicals Bureau (2000); Pubchem	1.451	251.242	74.67	27.64		-2.28	251.242	-10.5563
Methacrylic acid	anionic	CC(=C)C(=O)[O-]	-10.5563	2.77778e-11	Pubchem	1.656	256.549	81.19	40.13	9.239	-1.96	256.549	-10.5563
tylosyn	cationic?	CC[C@H]1OC(=O)C[C@@H](O)C(C)[C@@H](O[C@@H]2O[C@H](C)[C@@H](O[C@H]3C[C@@](C)(O)[C@@H](O)[C@H](C)O3)[C@@H]([C@H]2O)N(C)C)[C@@H](CC=O)C[C@@H](C)C(=O)\C=C\C(\C)=C\C1COC1O[C@H](C)[C@@H](O)[C@@H](OC)[C@H]1OC	-12.7	1.99526e-13	Hu and Coats (2007)	5.576	1235.43	867.39	238.7	389.584	2.36
