# Supplementary material for: Quantitative structure–activity relationships for primary aerobic biodegradation of organic chemicals in pristine surface waters: starting points for predicting biodegradation under acclimatization
Source: Royal Society of Chemistry journal article supplement (doi:10.1039/c7em00375g), 2017-11-14
Supplement: c7em00375g5.xlsx [file c7em00375g5.xlsx]

## Sheet: Sheet1
abbr	cas	name	ID	location	date	influent concentration	effluent concentration	fraction remaining
metfmne	657-24-9	metformine	1008	STADSKANAAL	2010-03-22	93.06	5.26	0.0565227
metfmne	657-24-9	metformine	1008	STADSKANAAL	2010-03-24	100.3	5.47	0.0545364
metfmne	657-24-9	metformine	5002	ENSCHEDE-WEST	2010-09-01	72	1.2	0.0166667
metfmne	657-24-9	metformine	5002	ENSCHEDE-WEST	2010-09-09	98	0.71	0.0072449
metfmne	657-24-9	metformine	5002	ENSCHEDE-WEST	2010-09-18	88	1.8	0.0204545
metfmne	657-24-9	metformine	5002	ENSCHEDE-WEST	2010-10-01	92	1.7	0.0184783
metfmne	657-24-9	metformine	5016	GOOR	2012-05-05	220	1.7	0.00772727
metfmne	657-24-9	metformine	5018	OOTMARSUM	2010-12-06	58	3.6	0.062069
metfmne	657-24-9	metformine	5018	OOTMARSUM	2010-12-07	72	3.9	0.0541667
metfmne	657-24-9	metformine	5018	OOTMARSUM	2010-12-08	89	2	0.0224719
metfmne	657-24-9	metformine	5018	OOTMARSUM	2010-12-09	86	1.8	0.0209302
metfmne	657-24-9	metformine	5018	OOTMARSUM	2010-12-10	67	2.1	0.0313433
metfmne	657-24-9	metformine	5022	RIJSSEN	2012-09-18	200	1.4	0.007
metfmne	657-24-9	metformine	9010	GROESBEEK-BREDEWEG	2009-11-04	37.1	4.5	0.121294
metfmne	657-24-9	metformine	9010	GROESBEEK-BREDEWEG	2009-11-05	30.2	5.2	0.172185
metfmne	657-24-9	metformine	9010	GROESBEEK-BREDEWEG	2014-09-25	29	0.97	0.0334483
metfmne	657-24-9	metformine	9010	GROESBEEK-BREDEWEG	2014-12-15	41	0.39	0.00951219
metfmne	657-24-9	metformine	9025	TIEL	2014-10-01	28	1.8	0.0642857
metfmne	657-24-9	metformine	9025	TIEL	2014-12-11	35	1.3	0.0371429
metfmne	657-24-9	metformine	10001	ZEIST	2010-07-15	824.1	14.8	0.017959
metfmne	657-24-9	metformine	10001	ZEIST	2010-07-19	1151	8.1	0.00703736
metfmne	657-24-9	metformine	10003	DE BILT	2010-07-15	667.1	23.6	0.035377
metfmne	657-24-9	metformine	10003	DE BILT	2010-07-19	12.1	12.9	1.06612
metfmne	657-24-9	metformine	10009	UTRECHT	2010-07-15	302.2	4.8	0.0158835
metfmne	657-24-9	metformine	10009	UTRECHT	2010-07-19	350.6	4.9	0.013976
metfmne	657-24-9	metformine	10027	AMERSFOORT	2009-11-17	102.2	2.8	0.0273973
metfmne	657-24-9	metformine	10027	AMERSFOORT	2009-11-19	101.2	2.5	0.0247036
metfmne	657-24-9	metformine	11006	UITHOORN	2010-07-19	861.7	3.4	0.00394569
metfmne	657-24-9	metformine	11006	UITHOORN	2010-07-21	925.3	3.7	0.0039987
metfmne	657-24-9	metformine	19003	THOLEN	2009-10-20	118	4	0.0338983
metfmne	657-24-9	metformine	19003	THOLEN	2009-10-22	72.1	4.6	0.0638003
metfmne	657-24-9	metformine	27003	EINDHOVEN	2009-11-09	85	1.5	0.0176471
metfmne	657-24-9	metformine	27003	EINDHOVEN	2009-11-10	77.8	1.1	0.0141388
metfmne	657-24-9	metformine	30011	SIMPELVELD	2010-03-16	40.38	27.48	0.680535
metfmne	657-24-9	metformine	30011	SIMPELVELD	2010-03-18	102.7	102.7	1
napxn	22204-53-1	naproxen	1008	STADSKANAAL	2007-01-16	6.6	0.24	0.0363636
napxn	22204-53-1	naproxen	1008	STADSKANAAL	2007-01-31	6.7	0.4	0.0597015
napxn	22204-53-1	naproxen	1008	STADSKANAAL	2007-02-02	6.3	0.31	0.0492063
napxn	22204-53-1	naproxen	1008	STADSKANAAL	2010-03-22	9.3	0.31	0.0333333
napxn	22204-53-1	naproxen	1008	STADSKANAAL	2010-03-24	11	0.31	0.0281818
napxn	22204-53-1	naproxen	3033	ECHTEN (DR)	2008-08-25	4.2	0.07	0.0166667
napxn	22204-53-1	naproxen	5002	ENSCHEDE-WEST	2010-09-18	1.5	0.059	0.0393333
napxn	22204-53-1	naproxen	5002	ENSCHEDE-WEST	2010-10-01	2.5	0.1	0.04
napxn	22204-53-1	naproxen	5018	OOTMARSUM	2010-12-06	1.8	0.099	0.055
napxn	22204-53-1	naproxen	5018	OOTMARSUM	2010-12-07	1.1	0.071	0.0645455
napxn	22204-53-1	naproxen	8019	BENNEKOM	2009-11-17	5.8	0.22	0.037931
napxn	22204-53-1	naproxen	8019	BENNEKOM	2009-11-19	5.4	0.19	0.0351852
napxn	22204-53-1	naproxen	9010	GROESBEEK-BREDEWEG	2009-11-04	2.5	0.23	0.092
napxn	22204-53-1	naproxen	9010	GROESBEEK-BREDEWEG	2009-11-05	2.2	0.29	0.131818
napxn	22204-53-1	naproxen	10027	AMERSFOORT	2009-11-17	5.3	0.17	0.0320755
napxn	22204-53-1	naproxen	10027	AMERSFOORT	2009-11-19	6.6	0.2	0.030303
napxn	22204-53-1	naproxen	10028	NIEUWEGEIN	2008-01-29	7.1	0.52	0.0732394
napxn	22204-53-1	naproxen	10028	NIEUWEGEIN	2008-02-08	5.8	0.66	0.113793
napxn	22204-53-1	naproxen	10028	NIEUWEGEIN	2008-02-13	6.4	1.4	0.21875
napxn	22204-53-1	naproxen	13041	KATWIJK	2008-01-29	3.5	0.13	0.0371429
napxn	22204-53-1	naproxen	13041	KATWIJK	2008-01-30	4	0.13	0.0325
napxn	22204-53-1	naproxen	13041	KATWIJK	2008-01-31	2.9	0.15	0.0517241
napxn	22204-53-1	naproxen	13045	AALSMEER	2010-03-25	3.2	2.1	0.65625
napxn	22204-53-1	naproxen	13045	AALSMEER	2010-04-22	3.9	2.2	0.564103
napxn	22204-53-1	naproxen	13045	AALSMEER	2010-05-20	3.3	0.91	0.275758
napxn	22204-53-1	naproxen	13045	AALSMEER	2010-06-14	3.1	0.58	0.187097
napxn	22204-53-1	naproxen	13045	AALSMEER	2010-07-12	1.3	0.07	0.0538462
napxn	22204-53-1	naproxen	13045	AALSMEER	2010-07-15	1.2	0.13	0.108333
napxn	22204-53-1	naproxen	19003	THOLEN	2009-10-20	9.2	0.14	0.0152174
napxn	22204-53-1	naproxen	19003	THOLEN	2009-10-22	4.4	0.13	0.0295455
napxn	22204-53-1	naproxen	27003	EINDHOVEN	2009-11-09	9.2	0.24	0.026087
napxn	22204-53-1	naproxen	27003	EINDHOVEN	2009-11-10	9.5	0.25	0.0263158
napxn	22204-53-1	naproxen	27008	'S HERTOGENBOSCH	2005-08-24	4.4	0.42	0.0954545
napxn	22204-53-1	naproxen	28003	AARLE RIXTEL	2005-08-24	4.6	0.33	0.0717391
napxn	22204-53-1	naproxen	28003	AARLE RIXTEL	2005-10-26	5.6	0.13	0.0232143
napxn	22204-53-1	naproxen	28005	DINTHER	2005-08-24	5.3	0.14	0.0264151
napxn	22204-53-1	naproxen	28005	DINTHER	2005-10-26	5.7	0.15	0.0263158
napxn	22204-53-1	naproxen	28006	VINKEL	2005-08-24	5.2	0.13	0.025
napxn	22204-53-1	naproxen	29002	OIJEN	2005-08-24	5	0.17	0.034
napxn	22204-53-1	naproxen	29002	OIJEN	2005-10-26	4.2	0.18	0.0428571
napxn	22204-53-1	naproxen	29003	LAND VAN CUIJK (HAPS)	2005-08-24	6.2	0.24	0.0387097
napxn	22204-53-1	naproxen	29003	LAND VAN CUIJK (HAPS)	2009-11-09	8.8	0.16	0.0181818
napxn	22204-53-1	naproxen	29003	LAND VAN CUIJK (HAPS)	2009-11-10	8.4	0.17	0.0202381
napxn	22204-53-1	naproxen	30011	SIMPELVELD	2010-03-16	1.6	1.7	1.0625
napxn	22204-53-1	naproxen	30011	SIMPELVELD	2010-03-18	5.7	1.6	0.280702
Naf	91-20-3	naftaleen	4027	NOORDOOSTPOLDER (TOLLEBEEK)	2014-07-11	0.03	33	0.666667
Naf	91-20-3	naftaleen	6003	DRONTEN	2014-07-03	0.04	75	0.25
Naf	91-20-3	naftaleen	6004	LELYSTAD	2011-04-18	0.087	7	0.931034
Naf	91-20-3	naftaleen	6004	LELYSTAD	2012-12-11	0.11	91	0.0909091
Naf	91-20-3	naftaleen	6004	LELYSTAD	2013-06-13	0.11	91	0.0909091
Naf	91-20-3	naftaleen	7017	VARSSEVELD	2005-09-22	0.76	99	0.0123684
Naf	91-20-3	naftaleen	7017	VARSSEVELD	2006-01-13	0.5	98	0.024
Naf	91-20-3	naftaleen	7017	VARSSEVELD	2006-04-04	0.38	-58	1.57895
Naf	91-20-3	naftaleen	13033	LEIDEN-ZUIDWEST	2002-07-31	0.11	69	0.309091
Naf	91-20-3	naftaleen	13033	LEIDEN-ZUIDWEST	2002-12-16	0.17	42	0.576471
Naf	91-20-3	naftaleen	13033	LEIDEN-ZUIDWEST	2006-03-07	0.13	88	0.123077
Naf	91-20-3	naftaleen	13033	LEIDEN-ZUIDWEST	2006-06-29	0.11	86	0.136364
Naf	91-20-3	naftaleen	13034	LISSE	2002-03-19	0.094	86	0.138298
Naf	91-20-3	naftaleen	13034	LISSE	2002-04-23	0.048	69	0.3125
Naf	91-20-3	naftaleen	13034	LISSE	2002-06-25	0.11	72	0.281818
Naf	91-20-3	naftaleen	13034	LISSE	2003-02-11	0.1	88	0.12
Naf	91-20-3	naftaleen	13034	LISSE	2003-11-21	0.14	91	0.0857143
Naf	91-20-3	naftaleen	13034	LISSE	2006-02-21	0.11	80	0.2
Naf	91-20-3	naftaleen	13034	LISSE	2006-03-06	0.15	89	0.113333
Naf	91-20-3	naftaleen	13034	LISSE	2006-08-10	0.12	85	0.15
Naf	91-20-3	naftaleen	13034	LISSE	2006-08-22	0.15	67	0.333333
Naf	91-20-3	naftaleen	13041	KATWIJK	2002-04-25	0.233	94	0.055794
Naf	91-20-3	naftaleen	13041	KATWIJK	2003-11-19	0.129	23	0.767442
Naf	91-20-3	naftaleen	13041	KATWIJK	2006-03-07	0.14	91	0.0857143
Naf	91-20-3	naftaleen	13042	BODEGRAVEN	2002-07-23	0.13	86	0.138461
Naf	91-20-3	naftaleen	13042	BODEGRAVEN	2002-10-01	0.12	85	0.15
Naf	91-20-3	naftaleen	13042	BODEGRAVEN	2003-06-26	0.1	87	0.13
Naf	91-20-3	naftaleen	18009	DE VERSEPUT (KERKWERVE)	2011-04-02	0.13	88	0.115385
Naf	91-20-3	naftaleen	18009	DE VERSEPUT (KERKWERVE)	2011-07-02	0.094	51	0.489362
Naf	91-20-3	naftaleen	18009	DE VERSEPUT (KERKWERVE)	2012-10-09	0.2	94	0.065
Naf	91-20-3	naftaleen	18009	DE VERSEPUT (KERKWERVE)	2013-01-12	0.17	92	0.0823529
Naf	91-20-3	naftaleen	18009	DE VERSEPUT (KERKWERVE)	2013-10-11	0.075	56	0.44
Naf	91-20-3	naftaleen	19001	ST MAARTENSDIJK-SCHERPENISSE	2011-01-06	0.58	74	0.258621
Naf	91-20-3	naftaleen	19001	ST MAARTENSDIJK-SCHERPENISSE	2013-04-10	0.3	91	0.0933333
Naf	91-20-3	naftaleen	20010	CAMPERLAND POLDER	2011-01-04	0.16	75	0.25
Naf	91-20-3	naftaleen	20010	CAMPERLAND POLDER	2011-07-03	0.3	72	0.28
Naf	91-20-3	naftaleen	20010	CAMPERLAND POLDER	2011-10-11	0.038	71	0.289474
Naf	91-20-3	naftaleen	20010	CAMPERLAND POLDER	2012-01-11	0.087	53	0.471264
Naf	91-20-3	naftaleen	20010	CAMPERLAND POLDER	2012-04-08	0.2	80	0.205
Naf	91-20-3	naftaleen	20010	CAMPERLAND POLDER	2012-07-05	0.11	75	0.254545
Naf	91-20-3	naftaleen	20010	CAMPERLAND POLDER	2012-10-09	0.053	77	0.226415
Naf	91-20-3	naftaleen	20010	CAMPERLAND POLDER	2013-01-13	0.085	85	0.152941
Naf	91-20-3	naftaleen	20011	WILLEM ANNAPOLDER	2011-07-04	0.27	88	0.118518
Naf	91-20-3	naftaleen	20011	WILLEM ANNAPOLDER	2013-10-08	0.36	97	0.0333333
Naf	91-20-3	naftaleen	21001	WALCHEREN	2011-01-04	1.1	87	0.127273
Naf	91-20-3	naftaleen	21001	WALCHEREN	2011-02-02	1.3	89	0.107692
Naf	91-20-3	naftaleen	21001	WALCHEREN	2011-03-02	0.64	91	0.0859375
Naf	91-20-3	naftaleen	21001	WALCHEREN	2011-04-03	0.45	97	0.0266667
Naf	91-20-3	naftaleen	21001	WALCHEREN	2011-06-16	0.52	98	0.0230769
Naf	91-20-3	naftaleen	21001	WALCHEREN	2011-07-02	0.15	87	0.126667
Naf	91-20-3	naftaleen	21001	WALCHEREN	2011-11-02	0.79	96	0.0417722
Naf	91-20-3	naftaleen	21001	WALCHEREN	2011-12-05	0.26	90	0.103846
Naf	91-20-3	naftaleen	21001	WALCHEREN	2012-01-04	0.37	92	0.0756757
Naf	91-20-3	naftaleen	21001	WALCHEREN	2012-04-08	1.5	96	0.0386667
Naf	91-20-3	naftaleen	21001	WALCHEREN	2012-05-03	0.9	91	0.0888889
Naf	91-20-3	naftaleen	21001	WALCHEREN	2012-06-02	0.32	87	0.128125
Naf	91-20-3	naftaleen	21001	WALCHEREN	2012-07-07	0.17	86	0.135294
Naf	91-20-3	naftaleen	21001	WALCHEREN	2012-08-02	0.17	70	0.3
Naf	91-20-3	naftaleen	21001	WALCHEREN	2012-09-05	0.32	95	0.053125
Naf	91-20-3	naftaleen	21001	WALCHEREN	2012-10-05	0.13	90	0.1
Naf	91-20-3	naftaleen	21001	WALCHEREN	2012-11-04	0.16	93	0.06875
Naf	91-20-3	naftaleen	21001	WALCHEREN	2013-02-06	0.28	94	0.0571429
Naf	91-20-3	naftaleen	21001	WALCHEREN	2013-05-05	0.9	97	0.0266667
Naf	91-20-3	naftaleen	21001	WALCHEREN	2013-07-05	0.23	70	0.304348
Naf	91-20-3	naftaleen	21001	WALCHEREN	2013-08-03	0.2	79	0.215
Naf	91-20-3	naftaleen	21001	WALCHEREN	2013-09-04	0.42	97	0.0333333
Naf	91-20-3	naftaleen	21001	WALCHEREN	2013-10-04	0.32	92	0.078125
Naf	91-20-3	naftaleen	21001	WALCHEREN	2013-12-04	1.8	96	0.0377778
Naf	91-20-3	naftaleen	21001	WALCHEREN	2014-01-09	0.35	93	0.0742857
Naf	91-20-3	naftaleen	23002	DE DRIE AMBACHTEN (TERNEUZEN)	2011-10-04	0.2	50	0.5
Naf	91-20-3	naftaleen	23002	DE DRIE AMBACHTEN (TERNEUZEN)	2012-07-13	0.058	55	0.448276
Naf	91-20-3	naftaleen	23002	DE DRIE AMBACHTEN (TERNEUZEN)	2013-01-22	0.096	83	0.166667
